# Supplementary material for: Electronic nature of zwitterionic alkali metal methanides, silanides and germanides – a combined experimental and computational approach
Source: PubMed Central journal article supplement (PMC5360169; doi:10.1039/c6sc02390h), 2016-10-07
Supplement: SC-008-C6SC02390H-s001.pdf [file SC-008-C6SC02390H-s001.pdf]

# Supporting Information

## **Electronic Nature of Zwitterionic Group 14 Anions of the Alkali Metals - A Combined Experimental and Computational Approach**

Hui Li, Adelia J. A. Aquino, David B. Cordes, William L. Hase, Clemens Krempner\*.

Texas Tech University, Department of Chemistry & Biochemistry, Box 41061, Lubbock, Texas,  
79409-1061.

|                                                                                                                                                                    |      |
|--------------------------------------------------------------------------------------------------------------------------------------------------------------------|------|
| <b>1. General Remarks</b> .....                                                                                                                                    | S3   |
| <b>2. Synthetic Procedures</b> .....                                                                                                                               | S4   |
| 2.1. Synthesis of [C(SiMe <sub>2</sub> OCH <sub>2</sub> CH <sub>2</sub> OMe) <sub>3</sub> Li] (Li-1).....                                                          | S4   |
| 2.2. Synthesis of [C(SiMe <sub>2</sub> OCH <sub>2</sub> CH <sub>2</sub> OMe) <sub>3</sub> K] (K-1).....                                                            | S5   |
| 2.3. Synthesis of Ge(SiMe <sub>2</sub> Cl) <sub>4</sub> .....                                                                                                      | S5   |
| 2.4. Synthesis of Ge(SiMe <sub>2</sub> OCH <sub>2</sub> CH <sub>2</sub> OMe) <sub>4</sub> (3).....                                                                 | S6   |
| 2.5. Synthesis of [Ge(SiMe <sub>2</sub> OCH <sub>2</sub> CH <sub>2</sub> OMe) <sub>3</sub> Li] (Li-3).....                                                         | S7   |
| 2.6. Synthesis of [Ge(SiMe <sub>2</sub> OCH <sub>2</sub> CH <sub>2</sub> OMe) <sub>3</sub> Na] (Na-3).....                                                         | S8   |
| 2.7. Synthesis of [Ge(SiMe <sub>2</sub> OCH <sub>2</sub> CH <sub>2</sub> OMe) <sub>3</sub> K] (K-3).....                                                           | S9   |
| 2.8. Synthesis of [HC(SiMe <sub>2</sub> OCH <sub>2</sub> CH <sub>2</sub> OMe) <sub>3</sub> Na][9-SiMe <sub>2</sub> Ph-C <sub>13</sub> H <sub>8</sub> ] (Na-4)..... | S10  |
| 2.9. Synthesis of [HC(SiMe <sub>2</sub> OCH <sub>2</sub> CH <sub>2</sub> OMe) <sub>3</sub> Li][BH <sub>4</sub> ] (Li-5).....                                       | S11  |
| 2.10. Synthesis of [HC(SiMe <sub>2</sub> OCH <sub>2</sub> CH <sub>2</sub> OMe) <sub>3</sub> Na][BPh <sub>4</sub> ] (Na-6).....                                     | S12  |
| <b>3. Estimation of the Basicities of M-1 – M-3</b> .....                                                                                                          | S13  |
| <b>4. X-ray crystallography</b> .....                                                                                                                              | S16  |
| <b>5. DFT Calculations</b> .....                                                                                                                                   | S24  |
| 5.1. Results of calculations for M-1 and [M-1-H] <sup>+</sup> (M = Li, Na, K).....                                                                                 | S25  |
| 5.2. Results of calculations for M-2 and [M-2-H] <sup>+</sup> (M = Li, Na, K).....                                                                                 | S29  |
| 5.3. Results of calculations for M-3 and [M-3-H] <sup>+</sup> (M = Li, Na, K).....                                                                                 | S32  |
| 5.4. Results of calculations for the metal free anions 1 <sup>-</sup> , 2 <sup>-</sup> , 3 <sup>-</sup> , 1, 2-H and 3-H.....                                      | S35  |
| 5.5. Results of calculations for the metal free anions 7 <sup>-</sup> , 8 <sup>-</sup> , 9 <sup>-</sup> , 7-H, 8-H and 9-H.....                                    | S44  |
| 5.6. B3-LYP/TZVP Cartesian coordinates [Å].....                                                                                                                    | S46  |
| <b>6. References</b> .....                                                                                                                                         | S128 |

## 1. General Remarks

All air- and moisture-sensitive manipulations were carried out using standard vacuum line, Schlenk or cannula techniques or in a Vacuum Atmospheres OMNI inert atmosphere drybox containing an atmosphere of purified nitrogen. THF, THF-D<sub>8</sub>, toluene, diethyl ether and hexanes were distilled under nitrogen from alkali metals and stored over 4 Å molecular sieves prior to use. C<sub>6</sub>D<sub>6</sub>, THF-D<sub>8</sub>, toluene-D<sub>8</sub>, CD<sub>2</sub>Cl<sub>2</sub> and MeOCH<sub>2</sub>CH<sub>2</sub>OH were dried and stored over 4 Å molecular sieves prior to use. NEt<sub>3</sub> and CH<sub>2</sub>Cl<sub>2</sub> were dried over CaH<sub>2</sub>, distilled under nitrogen and stored over 4 Å molecular sieves. All deuterated solvents were purchased from Cambridge Isotope Labs. Ph<sub>2</sub>PCH<sub>2</sub>PPh<sub>2</sub> (Alfa Aesar), Bu<sup>t</sup>Li (Acros), Bu<sup>t</sup>OK (Alfa Aesar), Bu<sup>t</sup>ONa (TCI), Bu<sup>t</sup>OLi (Aldrich), fluorene (Aldrich), LiBH<sub>4</sub> (Alfa Aesar), NaBPh<sub>4</sub> (Alfa Aesar) and 4,7,13,16,21,24-Hexaoxa-1,10-diazabicyclo[8.8.8]hexacosane [denoted as 2.2.2-cryptand] (Aldrich) were purchased from commercial sources and used without further purification. The compounds Ge(SiMe<sub>3</sub>)<sub>4</sub> [1], Si(SiMe<sub>2</sub>Cl)<sub>4</sub> [2], Si(SiMe<sub>2</sub>OCH<sub>2</sub>CH<sub>2</sub>OMe)<sub>4</sub> (**2**) [3], Si(SiMe<sub>2</sub>OCH<sub>2</sub>CH<sub>2</sub>OMe)<sub>3</sub>Li (Li-**2**) [3], Si(SiMe<sub>2</sub>OCH<sub>2</sub>CH<sub>2</sub>OMe)<sub>3</sub>Li (Na-**2**) [3], Si(SiMe<sub>2</sub>OCH<sub>2</sub>CH<sub>2</sub>OMe)<sub>3</sub>Li (K-**2**), [3], HC(SiMe<sub>3</sub>)<sub>3</sub> [4], HC(SiMe<sub>2</sub>Cl)<sub>3</sub> [4], HC(SiMe<sub>2</sub>OCH<sub>2</sub>CH<sub>2</sub>OMe)<sub>3</sub> (**1**) [4], C(SiMe<sub>2</sub>OCH<sub>2</sub>CH<sub>2</sub>OMe)<sub>3</sub>Na (Na-**1**) [4], Na-benzyl [4], K-benzyl [5], 9-Bu<sup>t</sup>-fluorene [4], 9-Pr<sup>i</sup>-fluorene [4], 9-Bu<sup>n</sup>-fluorene [4], 9-Ph-fluorene [6], 9-Me<sub>3</sub>Si-fluorene [7], 9-PhMe<sub>2</sub>Si-fluorene [8] and 9-Ph<sub>3</sub>Si-fluorene [8] were synthesized according to the literature procedures. The <sup>1</sup>H, <sup>23</sup>Na, <sup>7</sup>Li, <sup>13</sup>C, <sup>31</sup>P and <sup>29</sup>Si NMR spectra were obtained from a Varian Unity Inova 500 and JOEL ECS 400. All measurements, unless noted otherwise, were carried out at 298 K and NMR chemical shifts were given in ppm. The <sup>23</sup>Na NMR spectra were referenced to a 0.1 M solution of NaCl in D<sub>2</sub>O (δ = 0), <sup>7</sup>Li NMR spectra were referenced to a 0.1 M solution of LiCl in D<sub>2</sub>O (δ = 0) and the <sup>29</sup>Si NMR spectra to TMS (δ = 0 ppm). <sup>29</sup>Si NMR spectra were obtained by using the INEPT pulse sequence. The <sup>1</sup>H-NMR spectra were referenced to the residual protonated solvent for <sup>1</sup>H and the <sup>13</sup>C NMR spectra were referenced to the deuterated solvent peaks. The following abbreviations were used to describe peak multiplicities in the reported NMR spectroscopic data: ‘s’ for singlet, “d” for doublet, “t” for triplet, “quart.” for quartet, “sept” for septet, “m” for multiplet and “br” for broadened resonances. Elemental analyses were performed using a Perkin Elmer 2400 Series II CHNS/O Analyzer.

## 2. Synthetic Procedures

### 2.1. Synthesis of $C(Si(CH_3)_2OCH_2CH_2OCH_3)_3Li$ (Li-1)

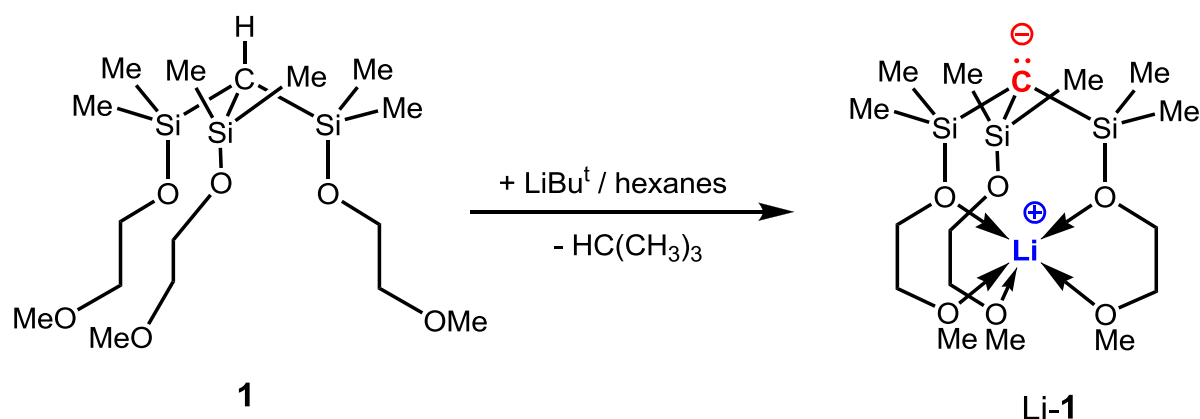

In a Glove box a 25 mL Schlenk flask equipped with a magnetic stir bar was charged with  $HC(SiMe_2OCH_2CH_2OCH_3)_3$  (**1**) (120 mg, 0.29 mmol) and 1 mL of hexane. The resulting solution was pre-cooled in a freezer and then a hexane solution of  $LiBu^+$  (0.2 mL, 1.5 M, 0.30 mmol) was added with stirring. After stirring the resulting solution for 2 hours at room temperature, the solvent was removed under vacuum to give raw **Li-1** as a colorless crystalline material. Recrystallization from hexanes gave an analytically pure sample of **Li-1** (92 mg, 76%).  $^1H$  NMR ( $C_6D_6$ , 400 MHz):  $\delta$  0.53 (s,  $Si(CH_3)_2$ , 18 H), 2.95 (s,  $OCH_3$ , 9 H), 3.10 (t,  $^3J_{H-H} = 4.8$  Hz,  $CH_2O$ , 6 H), 3.51 (t,  $^3J_{H-H} = 4.8$  Hz,  $SiOCH_2$ , 6 H) ppm.  $^{13}C\{H\}$  NMR ( $C_6D_6$ , 125.7 MHz):  $\delta$  4.3 ( $Si(CH_3)_2$ ), 60.2 ( $OCH_3$ ), 61.9 ( $OCH_2$ ), 74.4 ( $CH_2OCH_3$ ) ppm, signal from  $CSi_3$  was not observed.  $^{29}Si\{H\}$  NMR ( $C_6D_6$ , 99.3 MHz):  $\delta$  12.2 ( $Si(CH_3)_2O$ ) ppm.  $^7Li\{H\}$  NMR ( $C_6D_6$ , 194.2 MHz):  $\delta$  -0.58 ppm. Anal. calc. for  $C_{16}H_{39}O_6Si_3Li$  (418.67): C, 45.90; H, 9.39. Found: C, 46.20; H, 9.35%.

## 2.2. Synthesis of [C(SiMe<sub>2</sub>OCH<sub>2</sub>CH<sub>2</sub>OMe)<sub>3</sub>K] (K-1)

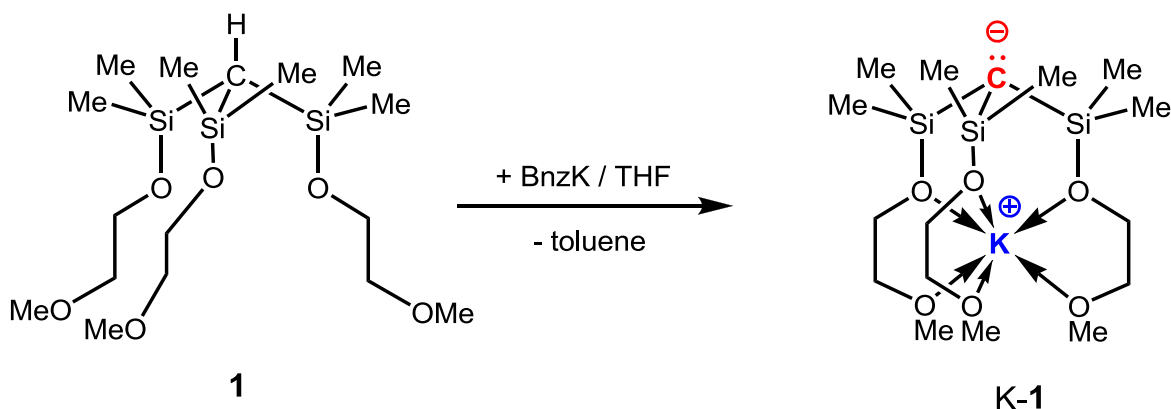

In a Glove box a 25 mL Schlenk flask equipped with a magnetic stir bar was charged with benzyl potassium (30mg, 0.26 mmol), HC(Si(CH<sub>3</sub>)<sub>2</sub>OCH<sub>2</sub>CH<sub>2</sub>OCH<sub>3</sub>)<sub>4</sub> (**1**) (100 mg, 0.24 mmol) and 1 mL of THF. After stirring the resulting solution for 3 hours, the solvent was removed under vacuum. The solid residue recrystallized from hexanes to give K-**1** (46 mg, 42%). <sup>1</sup>H NMR (C<sub>6</sub>D<sub>6</sub>, 300 MHz): δ 0.54 (s, Si(CH<sub>3</sub>)<sub>2</sub>, 18 H), 2.87 (s, OCH<sub>3</sub>, 9 H), 3.04 (t, <sup>3</sup>J<sub>H-H</sub> = 4.5 Hz, CH<sub>2</sub>O, 6 H), 3.47 (t, <sup>3</sup>J<sub>H-H</sub> = 4.5 Hz, SiOCH<sub>2</sub>, 6 H) ppm. <sup>13</sup>C{H} NMR (C<sub>6</sub>D<sub>6</sub>, 125.7 MHz): δ 3.6 (Si(CH<sub>3</sub>)<sub>2</sub>), 57.3(OCH<sub>3</sub>), 60.1 (OCH<sub>2</sub>), 75.0 (CH<sub>2</sub>OCH<sub>3</sub>) ppm, signal from CSi<sub>3</sub> was not observed. <sup>29</sup>Si{H} NMR (C<sub>6</sub>D<sub>6</sub>, 99.3 MHz): δ 8.7 (Si(CH<sub>3</sub>)<sub>2</sub>O) ppm. Anal. calc. for C<sub>16</sub>H<sub>39</sub>O<sub>6</sub>Si<sub>3</sub>K (450.83): C, 42.63; H, 8.72. Found: C, 42.79; H, 8.84%.

## 2.3. Synthesis of Ge(SiMe<sub>2</sub>Cl)<sub>4</sub>

A 100 mL three-neck round bottom flask equipped with a reflux condenser, addition funnel and large magnetic stir bar was charged with Ge(SiMe<sub>3</sub>)<sub>4</sub> (3 g, 8.2 mmol), AlCl<sub>3</sub> (6 g, 45 mmol) and 20 mL of dry hexanes. After the vigorously stirred suspension was heated (ca. 55-60°C), acetyl chloride (3 mL) dissolved in 10 mL of dry hexanes was slowly added via addition funnel within an hour. After the resulting emulsion (two liquid phases) was vigorously stirred with heating (ca. 55-60°C) overnight, 100 mL hexanes were added and the mixture was cooled to room temperature.

Then the upper phase was carefully separated from the viscous lower phase by decantation via cannula and the lower phase was extracted twice with hexanes. The solvent and other volatiles of the combined extracts were removed under vacuum to leave a solid. Vacuum distillation of the semi-solid using a Kugelrohrföfen gave 2.6 g (71 %) of the title compound as a crystalline material.  $^1\text{H}$  NMR ( $\text{C}_6\text{D}_6$ , 400 MHz):  $\delta$  0.63 (s,  $\text{Si}(\text{CH}_3)_2$ , 24 H) ppm.  $^{13}\text{C}\{\text{H}\}$  NMR ( $\text{C}_6\text{D}_6$ , 125.7 MHz):  $\delta$  7.1 ( $\text{Si}(\text{CH}_3)_2$ ) ppm.  $^{29}\text{Si}\{\text{H}\}$  NMR ( $\text{C}_6\text{D}_6$ , 99.3 MHz):  $\delta$  30.1 ( $\text{Si}(\text{CH}_3)_2$ ) ppm. Anal. calc. for  $\text{C}_{12}\text{H}_{36}\text{Si}_4\text{Ge}$  (366.11): C, 39.44; H, 9.93. Found: C, 39.28; H, 9.89%.

#### 2.4. Synthesis of $\text{Ge}(\text{SiMe}_2\text{OCH}_2\text{CH}_2\text{OMe})_4$ (**3**)

A 50 mL Schlenk flask equipped with a magnetic stir bar was charged with  $\text{NEt}_3$  (10.8 ml, 5.72 mmol)  $\text{Ge}(\text{Si}(\text{CH}_3)_2\text{Cl})_4$  (600 mg, 1.34 mmol) and hexanes (30 mL) and cooled to 0–5°C. Upon adding dropwise  $\text{HOCH}_2\text{CH}_2\text{SCH}_3$  (2 ml, 25.4 mmol) via syringe a white suspension immediately formed, which was allowed to stir overnight at room temperature (the progress of the reaction was monitored by  $^1\text{H}$ -NMR spectroscopy). Then the suspension was centrifuged, the liquid phase decanted and the solid phase washed two times with ca. 5 mL of hexanes. The organic phases were combined and solvent and excess  $\text{HOCH}_2\text{CH}_2\text{OCH}_3$  were removed under high vacuum (ca.  $10^{-1}$  mbar). Then 5 mL of hexanes were added to the residue, the mixture was centrifuged, the liquid phase decanted and the solvent evaporated under vacuum. Distillation of the liquid residue using a Kugelrohrföfen afforded 470 mg (58%) of **3** as a colorless liquid.  $^1\text{H}$  NMR ( $\text{C}_6\text{D}_6$ , 400 MHz):  $\delta$  0.60 (s,  $\text{Si}(\text{CH}_3)_2$ , 24 H), 3.15 (s,  $\text{OCH}_3$ , 12 H), 3.39 (t,  $^3J_{\text{H-H}} = 5.5$  Hz,  $\text{CH}_2\text{O}$ , 8 H) 3.80 (t,  $^3J_{\text{H-H}} = 5.5$  Hz,  $\text{SiOCH}_2$ , 8 H) ppm.  $^{13}\text{C}\{\text{H}\}$  NMR ( $\text{C}_6\text{D}_6$ , 125.7 MHz):  $\delta$  4.6 ( $\text{Si}(\text{CH}_3)_2$ ), 58.6 ( $\text{OCH}_3$ ), 63.0 ( $\text{OCH}_2$ ), 74.3 ( $\text{CH}_2\text{OCH}_3$ ) ppm.  $^{29}\text{Si}\{\text{H}\}$  NMR ( $\text{C}_6\text{D}_6$ , 99.3 MHz):  $\delta$  25.1 ( $\text{Si}(\text{CH}_3)_2\text{O}$ ) ppm. Anal. calc. for  $\text{C}_{20}\text{H}_{52}\text{O}_8\text{Si}_4\text{Ge}$  (605.56): C, 39.67; H, 8.65. Found: C, 39.26; H, 8.77%.

## 2.5. Synthesis of [Ge(SiMe<sub>2</sub>OCH<sub>2</sub>CH<sub>2</sub>OMe)<sub>3</sub>Li] (Li-3)

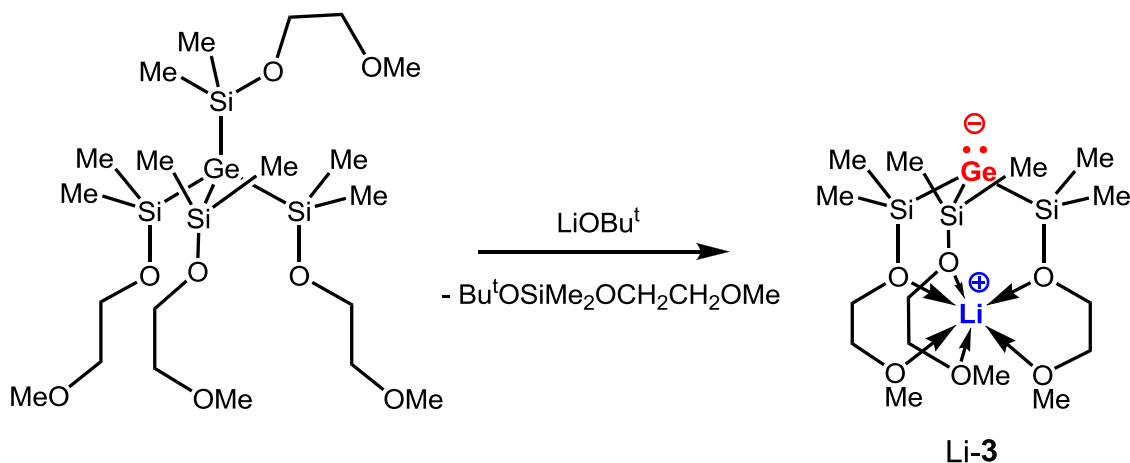

In a Glove box a 25 mL Schlenk flask equipped with a magnetic stir bar was charged with Bu<sup>t</sup>OLi (14 mg, 0.17 mmol), Ge(Si(CH<sub>3</sub>)<sub>2</sub>OCH<sub>2</sub>CH<sub>2</sub>OCH<sub>3</sub>)<sub>4</sub> (**3**) (100 mg, 0.17 mmol) and 1 mL of THF. After stirring the resulting solution for 1.5 hours, the solvent was removed under vacuum to give Li-**3** a yellow crystalline material nearly quantitatively (by <sup>1</sup>H and <sup>13</sup>C NMR). Recrystallization from toluene gave an analytically pure sample of Li-**3** (64 mg, 81%). <sup>1</sup>H NMR (C<sub>6</sub>D<sub>6</sub>, 400 MHz): δ 0.66 (s, Si(CH<sub>3</sub>)<sub>2</sub>, 18 H), 2.94 (s, OCH<sub>3</sub>, 9 H), 2.99 (t, <sup>3</sup>J<sub>H-H</sub> = 4.8 Hz, CH<sub>2</sub>O, 6 H), 3.39 (t, <sup>3</sup>J<sub>H-H</sub> = 4.8 Hz, SiOCH<sub>2</sub>, 6 H) ppm. <sup>13</sup>C{H} NMR (C<sub>6</sub>D<sub>6</sub>, 125.7 MHz): δ 5.8 (Si(CH<sub>3</sub>)<sub>2</sub>), 58.5 (OCH<sub>3</sub>), 61.1 (OCH<sub>2</sub>), 73.6 (CH<sub>2</sub>OCH<sub>3</sub>) ppm. <sup>29</sup>Si{H} NMR (C<sub>6</sub>D<sub>6</sub>, 99.3 MHz): δ 47.9 (Si(CH<sub>3</sub>)<sub>2</sub>(CH<sub>3</sub>)<sub>2</sub>O) ppm. <sup>7</sup>Li{H} NMR (C<sub>6</sub>D<sub>6</sub>, 194.2 MHz): δ -1.1 ppm. Anal. calc. for C<sub>15</sub>H<sub>39</sub>O<sub>6</sub>Si<sub>3</sub>GeLi (479.30): C, 37.59; H, 8.20. Found: C, 38.11; H, 8.09 %.

## 2.6. Synthesis of [Ge(SiMe<sub>2</sub>OCH<sub>2</sub>CH<sub>2</sub>OMe)<sub>3</sub>Na] (Na-3)

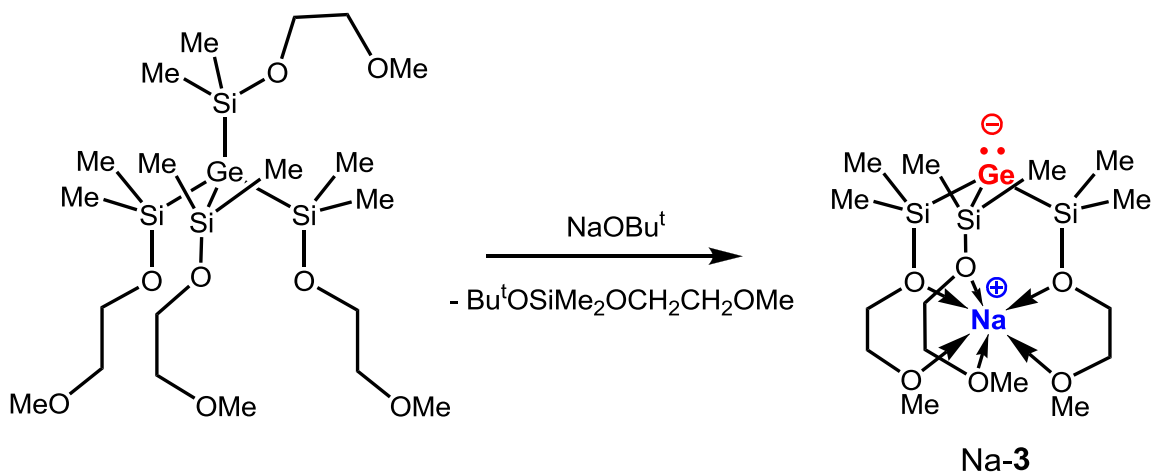

In a Glove box a 25 mL Schlenk flask equipped with a magnetic stir bar was charged with Bu<sup>t</sup>ONa (17 mg, 0.18 mmol), Ge(Si(CH<sub>3</sub>)<sub>2</sub>OCH<sub>2</sub>CH<sub>2</sub>OCH<sub>3</sub>)<sub>4</sub> (**3**) (100 mg, 0.17 mmol) and 1 mL of THF. After stirring the resulting solution for 1.5 hours, the solvent was removed under vacuum to give raw Na-**3** as a red crystalline material nearly quantitatively (by <sup>1</sup>H and <sup>13</sup>C NMR). Recrystallization from hexanes gave an analytically pure sample of Na-**3** (68 mg, 83%). <sup>1</sup>H NMR (C<sub>6</sub>D<sub>6</sub>, 400 MHz): δ 0.70 (s, Si(CH<sub>3</sub>)<sub>2</sub>, 18 H), 2.88 (s, OCH<sub>3</sub>, 9 H), 2.93 (t, <sup>3</sup>J<sub>H-H</sub> = 4.4 Hz, CH<sub>2</sub>O, 6 H), 3.38 (t, <sup>3</sup>J<sub>H-H</sub> = 4.4 Hz, SiOCH<sub>2</sub>, 6 H) ppm. <sup>13</sup>C{H} NMR (C<sub>6</sub>D<sub>6</sub>, 125.7 MHz): δ 5.7 (Si(CH<sub>3</sub>)<sub>2</sub>), 58.1 (OCH<sub>3</sub>), 60.8(OCH<sub>2</sub>), 74.4 (CH<sub>2</sub>OCH<sub>3</sub>) ppm. <sup>29</sup>Si{H} NMR (C<sub>6</sub>D<sub>6</sub>, 99.3 MHz): δ 45.4 (Si(CH<sub>3</sub>)<sub>2</sub>O) ppm. <sup>23</sup>Na{H} NMR (C<sub>6</sub>D<sub>6</sub>, 132.2 MHz): δ 0.4 ppm. Anal. calc. for C<sub>15</sub>H<sub>39</sub>O<sub>6</sub>Si<sub>3</sub>GeNa (495.39): C, 36.37; H, 7.94. Found: C, 36.59; H, 7.99%.



## 2.7. Synthesis of [Ge(SiMe<sub>2</sub>OCH<sub>2</sub>CH<sub>2</sub>OMe)<sub>3</sub>K] (K-3)

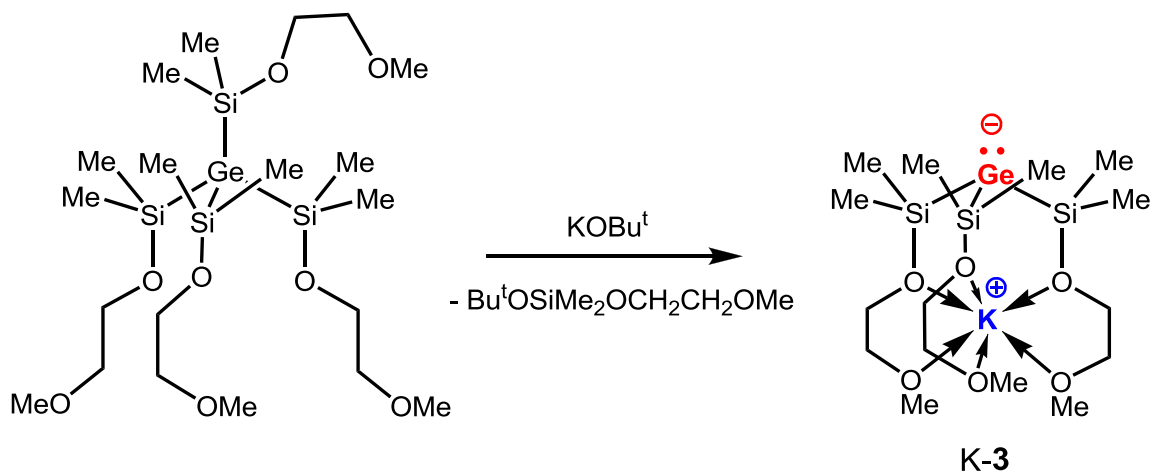

In a Glove box a 25 mL Schlenk flask equipped with a magnetic stir bar was charged with Bu<sup>t</sup>OK (20 mg, 0.18 mmol), Ge(Si(CH<sub>3</sub>)<sub>2</sub>OCH<sub>2</sub>CH<sub>2</sub>OCH<sub>3</sub>)<sub>4</sub> (**3**) (100 mg, 0.17 mmol) and 1 mL of THF. After stirring the resulting solution for 1.5 hours, the solvent was removed under vacuum to give K-**3** as a brown crystalline material nearly quantitatively (by <sup>1</sup>H and <sup>13</sup>C NMR). Recrystallization from hexanes gave an analytically pure sample of K-**3** (67 mg, 79%). <sup>1</sup>H NMR (C<sub>6</sub>D<sub>6</sub>, 400 MHz): δ 0.73 (s, Si(CH<sub>3</sub>)<sub>2</sub>, 18 H), 2.86 (s, OCH<sub>3</sub>, 9 H), 2.97 (t, <sup>3</sup>J<sub>H-H</sub> = 4.4 Hz, CH<sub>2</sub>O, 6 H), 3.44 (t, <sup>3</sup>J<sub>H-H</sub> = 4.4 Hz, SiOCH<sub>2</sub>, 6 H) ppm. <sup>13</sup>C{H} NMR (C<sub>6</sub>D<sub>6</sub>, 125.7 MHz): δ 5.7 (Si(CH<sub>3</sub>)<sub>2</sub>), 57.6 (OCH<sub>3</sub>), 60.9 (OCH<sub>2</sub>), 74.9 (CH<sub>2</sub>OCH<sub>3</sub>) ppm. <sup>29</sup>Si{H} NMR (C<sub>6</sub>D<sub>6</sub>, 99.3 MHz): δ 41.1 (Si(CH<sub>3</sub>)<sub>2</sub>) ppm. Anal. calc. for C<sub>15</sub>H<sub>39</sub>O<sub>6</sub>Si<sub>3</sub>GeK (511.46): C, 35.22; H, 7.69. Found: C, 35.67; H, 8.08 %.

## 2.8. Synthesis of $[\text{HC}(\text{SiMe}_2\text{OCH}_2\text{CH}_2\text{OMe})_3\text{Na}][9\text{-SiMe}_2\text{Ph-C}_{13}\text{H}_8]$ (Na-4)

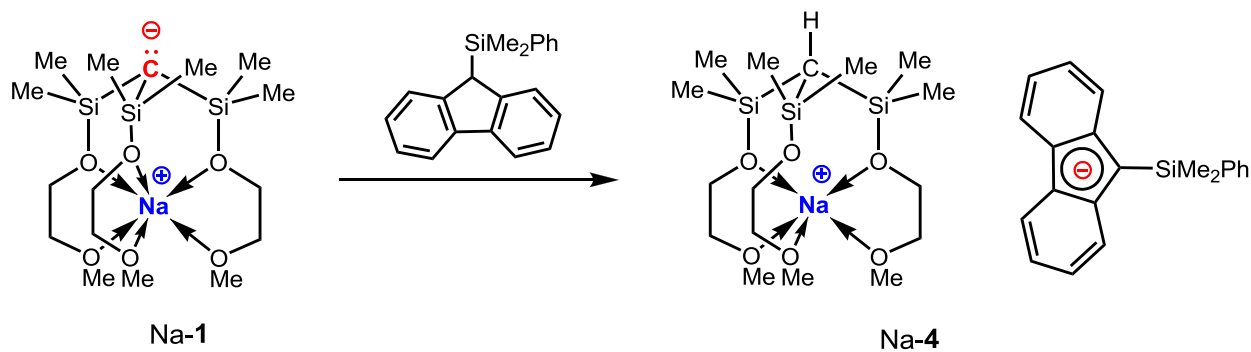

In a Glove box a 25 mL Schlenk flask equipped with a magnetic stir bar was charged with 9-SiMe<sub>2</sub>Ph-fluorene (55 mg, 0.18 mmol), Na-1 (80 mg, 0.18 mmol) and 1 mL of THF. After stirring the resulting solution for 3 hours, the solvent was removed under vacuum and the solid residue was washed twice with hexanes to give 123 mg of Na-4 as a pale yellow powder (91%). The compound is thermally labile and slowly decomposes upon storage in the box. <sup>1</sup>H NMR (THF-D<sub>8</sub>, 400 MHz): δ -0.25 (b, HCSi<sub>3</sub>, 1 H) 0.26 (s, Si(CH<sub>3</sub>)<sub>2</sub>O, 18 H), 0.90 (s, Si(CH<sub>3</sub>)<sub>2</sub>Ph, 6 H) 3.15 (m, CH<sub>2</sub>O and OCH<sub>3</sub>, 15 H), 3.43 (t, <sup>3</sup>J<sub>H-H</sub> = 4.6 Hz, SiOCH<sub>2</sub>, 6 H), 6.85, 7.11, 7.29, 7.38, 7.81, 7.82, 8.22 (arom. H, 13 H) ppm. <sup>13</sup>C{H} NMR (THF-D<sub>8</sub>, 125.7 MHz): δ 1.6 (Si(CH<sub>3</sub>)<sub>2</sub>O), 2.2 (Si(CH<sub>3</sub>)<sub>2</sub>Ph), 10.1 (CSi<sub>3</sub>), 58.9 (OCH<sub>3</sub>), 62.1 (OCH<sub>2</sub>), 74.2 (CH<sub>2</sub>OCH<sub>3</sub>), 81.1 (C from CSi(CH<sub>3</sub>)<sub>2</sub>Ph) 111.1, 119.2, 119.4, 120.8, 126.8, 127.8, 127.9, 135.3, 144.8, 146.2 (arom. C) ppm. <sup>29</sup>Si{H} NMR (THF-D<sub>8</sub>, 99.3 MHz): δ 17.5 (Si(CH<sub>3</sub>)<sub>2</sub>O), -16.4 (Si(CH<sub>3</sub>)<sub>2</sub>Ph) ppm. <sup>23</sup>Na{H} NMR (THF-D<sub>8</sub>, 132.2 MHz): δ -9.0 ppm.

## 2.9. Synthesis of $[\text{HC}(\text{SiMe}_2\text{OCH}_2\text{CH}_2\text{OMe})_3\text{Li}][\text{BH}_4]$ (Li-5)

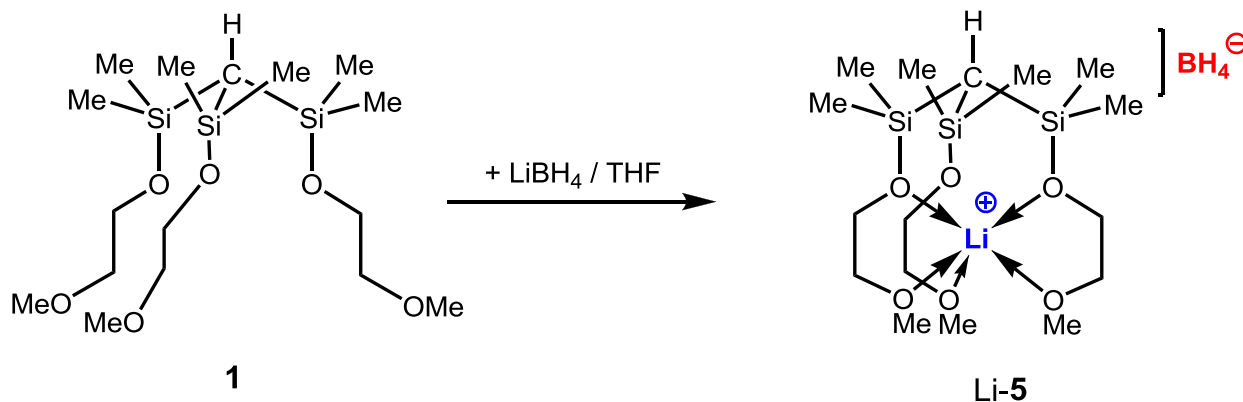

In a Glove box a 25 mL Schlenk flask equipped with a magnetic stir bar was charged with  $\text{LiBH}_4$  (5 mg, 0.23 mmol),  $\text{HC}(\text{Si}(\text{CH}_3)_2\text{OCH}_2\text{CH}_2\text{OCH}_3)_3$  (**1**) (100 mg, 0.24 mmol) and 1 mL of THF. The resulting suspension was stirred until it became a clear solution (approximately after a week). Then, the solvent was removed under vacuum to leave a crystalline residue, which was washed twice with hexanes and dried under vacuum. Yield (90 mg, 86%).  $^1\text{H}$  NMR ( $\text{C}_6\text{D}_6$ , 400 MHz):  $\delta$  0.31 (b,  $\text{HCSi}_3$ , 1 H) 0.56 (quart.,  $^1J_{\text{H-B}} = 81.2$  Hz,  $\text{BH}_4$ , 4 H), 1.16 (s,  $\text{SiMe}_2\text{O}$ , 18 H), 3.10 (t,  $^3J_{\text{H-H}} = 4.6$  Hz,  $\text{CH}_2\text{O}$ , 6 H), 3.19 (s,  $\text{OCH}_3$ , 9 H), 3.35 (t,  $^3J_{\text{H-H}} = 4.6$  Hz,  $\text{SiOCH}_2$ , 6 H), ppm.  $^{13}\text{C}\{\text{H}\}$  NMR ( $\text{C}_6\text{D}_6$ , 100.6 MHz):  $\delta$  0.6 ( $\text{SiMe}_2\text{O}$ ), 9.4 ( $\text{CSi}_3$ ), 58.6 ( $\text{OMe}$ ), 60.9 ( $\text{OCH}_2$ ), 72.5 ( $\text{CH}_2\text{OMe}$ ) ppm.  $^{29}\text{Si}\{\text{H}\}$  NMR ( $\text{C}_6\text{D}_6$ , 79.5 MHz):  $\delta$  18.6 ppm.  $^7\text{Li}\{\text{H}\}$  NMR ( $\text{C}_6\text{D}_6$ , 155.5 MHz):  $\delta$  2.5 ppm.  $^{11}\text{B}\{\text{H}\}$  NMR ( $\text{C}_6\text{D}_6$ , 128.3 MHz): -40.2 (quintet,  $^1J_{\text{H-B}} = 81.2$  Hz) ppm. Anal. calc. for  $\text{C}_{16}\text{H}_{44}\text{O}_6\text{Si}_3\text{BLi}$  (434.525): C, 44.23; H, 10.21. Found: C, 43.97; H, 10.08 %.

## 2.10. Synthesis of [HC(SiMe<sub>2</sub>OCH<sub>2</sub>CH<sub>2</sub>OMe)<sub>3</sub>Na][BPh<sub>4</sub>] (Na-6)

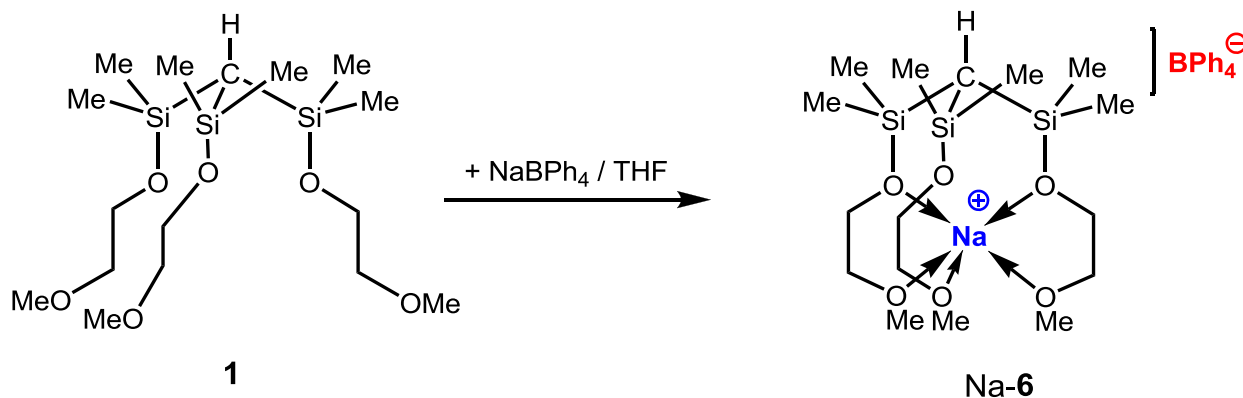

In a Glove box a 25 mL Schlenk flask equipped with a magnetic stir bar was charged with NaBPh<sub>4</sub> (50 mg, 0.15 mmol), HC(Si(CH<sub>3</sub>)<sub>2</sub>OCH<sub>2</sub>CH<sub>2</sub>OCH<sub>3</sub>)<sub>3</sub> (**1**) (60 mg, 0.15 mmol) and 2 mL of CH<sub>2</sub>Cl<sub>2</sub>. The resulting suspension was stirred overnight until it became a clear solution. Then, the solvent was removed under vacuum to leave crystalline residue, which was washed twice with small amounts of benzene and dried under vacuum. Yield (98 mg, 89%). <sup>1</sup>H NMR (C<sub>6</sub>D<sub>6</sub>, 400 MHz): δ -1.38 (b, HCSi<sub>3</sub>, 1 H) -0.11 (s, SiMe<sub>2</sub>O, 18 H), 2.69 (t, <sup>3</sup>J<sub>H-H</sub> = 4.6 Hz, CH<sub>2</sub>O, 6 H), 2.78 (s, OCH<sub>3</sub>, 9 H), 2.89 (t, <sup>3</sup>J<sub>H-H</sub> = 4.6 Hz, SiOCH<sub>2</sub>, 6 H), 7.27 (t, *p*-H 4 H), 7.44 (t, *m*-H, 8 H), 8.16 (b, *o*-H, 8 H) ppm. <sup>1</sup>H NMR (CDCl<sub>3</sub>, 400 MHz): δ -0.72 (b, HCSi<sub>3</sub>, 1 H) 0.22 (s, SiMe<sub>2</sub>O, 18 H), 3.29 (s, OCH<sub>3</sub>, 9 H), 3.33 (t, <sup>3</sup>J<sub>H-H</sub> = 4.6 Hz, CH<sub>2</sub>O, 6 H), 3.55 (t, <sup>3</sup>J<sub>H-H</sub> = 4.6 Hz, SiOCH<sub>2</sub>, 6 H), 6.89 (m, *p*-H, 4 H), 7.04 (m, *m*-H, 8 H), 7.40 (b, *o*-H, 8 H) ppm. <sup>13</sup>C{H} NMR (CDCl<sub>3</sub>, 100.6 MHz): δ 1.8 (SiMe<sub>2</sub>O), 7.9 (CSi<sub>3</sub>), 51.2 (OMe), 61.4 (OCH<sub>2</sub>), 73.1 (CH<sub>2</sub>OMe), 121.6, 125.5, 136.4, 163.6, 164.1, 164.6, 165.1 (aromatic C) ppm. <sup>29</sup>Si{H} NMR (CDCl<sub>3</sub>, 79.5 MHz): δ 21.2 (SiMe<sub>2</sub>O), ppm. <sup>23</sup>Na{H} NMR (CDCl<sub>3</sub>, 105.8 MHz): δ 0.1 ppm. <sup>11</sup>B{H} NMR (CDCl<sub>3</sub>, 128.3 MHz): δ -7.5 ppm. Anal. calc. for C<sub>40</sub>H<sub>60</sub>O<sub>6</sub>Si<sub>3</sub>BNa (754.958): C, 63.64; H, 8.01. Found: C, 63.61; H, 7.96 %.

### 3. Estimation of the Basicities of M-1 – M-3

**General procedure:** In the glove box, a J-Young NMR tube was charged with one equiv. (ca. 0.02 mmol) of the respective zwitterion M-1, M-2 or M-3, one equivalent (ca. 0.02 mmol) of the hydrocarbon acid (Ind-H) and ca. 0.4 mL of solvent (THF-D<sub>8</sub> or C<sub>6</sub>D<sub>6</sub>). For some experiments (see Tables S1 and S2) one equivalent of 2.2.2-cryptand was added as well. <sup>1</sup>H NMR spectra of the resulting solutions were taken immediately and after ca. 3 hours if not mentioned otherwise. The ratios product to starting material were estimated from integrating the respective signals in <sup>1</sup>H-NMR spectrum. The relative pK<sub>a</sub>-values were calculated according to the following equation:

$$\text{pK}_a(\text{acid}) = \text{pK}_a(\text{IndH}) + \lg \frac{[\text{acid}][\text{Ind}^-]}{[\text{base}][\text{IndH}]}$$

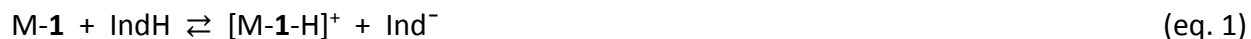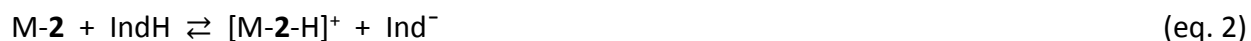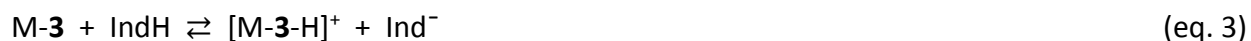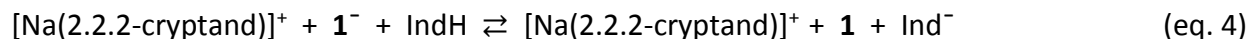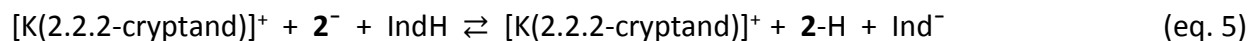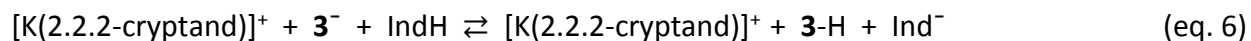

**Table S1.** Estimated  $pK_a$  values of M-1 - M-3 (M = Li, Na, K) derived from acid-base measurements by  $^1\text{H-NMR}$  spectroscopy in THF- $\text{D}_8$ .

| Acid<br>[IndH]                        | $pK_a$<br>[DMSO] <sup>a</sup> | Base<br>[M-1 – M-3]   | conv.<br>[%] | $pK_a$<br>[calc.] <sup>a</sup> |
|---------------------------------------|-------------------------------|-----------------------|--------------|--------------------------------|
| $\text{Ph}_3\text{PCH}_2\text{PPh}_3$ | 29.9                          | Na-1/(2.2.2-cryptand) | 30           | 29.2                           |
| 9-Bu <sup>t</sup> -fluorene           | 24.4                          | K-1                   | 10           | -                              |
| 9-Pr <sup>i</sup> -fluorene           | 23.2                          | K-1                   | 82           | 24.5                           |
| 9-Bu <sup>t</sup> -fluorene           | 24.4                          | Na-1                  | 0            | -                              |
| 9-Pr <sup>i</sup> -fluorene           | 23.2                          | Na-1                  | 62           | 23.6                           |
| 9-Bu <sup>n</sup> -fluorene           | 22.2                          | Na-1                  | 86           | 23.8                           |
| 9-Bu <sup>t</sup> -fluorene           | 24.4                          | Li-1                  | 0            | -                              |
| 9-Pr <sup>i</sup> -fluorene           | 23.2                          | Li-1                  | 62           | 23.6                           |
| 9-Bu <sup>n</sup> -fluorene           | 22.2                          | K-2                   | 53           | 22.3                           |
| 9-Me <sub>3</sub> Si-fluorene         | 21.5                          | K-2                   | 70           | 22.2                           |
| 9-Ph <sub>3</sub> Si-fluorene         | 18.6                          | Li-2                  | 80           | 19.8                           |
| 9-Ph-fluorene                         | 17.9                          | Li-2                  | 100          | -                              |
| 9-Ph <sub>3</sub> Si-fluorene         | 18.6                          | Na-2                  | 56           | 18.8                           |
| 9-Ph <sub>3</sub> Si-fluorene         | 18.6                          | K-3                   | 33           | 18.0                           |
| 9-Ph-fluorene                         | 17.9                          | Li-3                  | 9            | "15.9"                         |
| 9-Ph-fluorene                         | 17.9                          | Na-3                  | 0            | -                              |

<sup>a</sup> It is customary among chemists to use the term " $pK_a$  of base" with the actual meaning of the  $pK_a$  of the conjugate acid of the respective base.

**Table S2.** Estimated pK<sub>a</sub> values of M-1 - M-3 (M = Li, Na, K) derived from acid-base measurements by <sup>1</sup>H-NMR spectroscopy in C<sub>6</sub>D<sub>6</sub>.

| Acid<br>[Ind-H]                                   | pK <sub>a</sub><br>[DMSO] | Base<br>[M-1 – M-3]  | Conv.<br>[%] | pK <sub>a</sub><br>[calc.] <sup>a</sup> |
|---------------------------------------------------|---------------------------|----------------------|--------------|-----------------------------------------|
| Ph <sub>3</sub> PCH <sub>2</sub> PPh <sub>3</sub> | 29.9                      | K-2/(2.2.2-cryptand) | 0            | -                                       |
| 9-Bu <sup>t</sup> -fluorene                       | 24.2                      | K-2/(2.2.2-cryptand) | 100          | -                                       |
| 9-Pr <sup>i</sup> -fluorene                       | 23.2                      | K-3/(2.2.2-cryptand) | 42           | 22.9                                    |
| 9-Pr <sup>i</sup> -fluorene                       | 23.2                      | Li-1                 | 45           | 23.0                                    |
| 9-Bu <sup>n</sup> -fluorene                       | 22.2                      | Li-1                 | 69           | 22.9                                    |
| 9-Bu <sup>t</sup> -fluorene                       | 24.2                      | Na-1                 | 0            | -                                       |
| 9-Pr <sup>i</sup> -fluorene                       | 23.2                      | Na-1                 | 0            | -                                       |
| 9-Bu <sup>n</sup> -fluorene                       | 22.2                      | Na-1                 | 59           | 22.5                                    |
| 9-Bu <sup>n</sup> -fluorene                       | 22.2                      | K-1                  | 50           | 22.2                                    |
| 9-Ph <sub>3</sub> Si-fluorene                     | 18.6                      | K-2                  | 53           | 18.7                                    |
| 9-Ph <sub>3</sub> Si-fluorene                     | 18.6                      | Li-2                 | 33           | 18.0                                    |
| 9-Ph <sub>3</sub> Si-fluorene                     | 18.6                      | Na-2                 | 0            | -                                       |
| 9-Ph-fluorene                                     | 17.9                      | Na-2                 | 10           | "16.0"                                  |
| 9-Ph-fluorene                                     | 17.9                      | Li-3                 | 0            | -                                       |
| 9-Ph-fluorene                                     | 17.9                      | Na-3                 | 0            | -                                       |
| 9-Ph-fluorene                                     | 17.9                      | K-3                  | 0            | -                                       |

<sup>a</sup> It is customary among chemists to use the term "pK<sub>a</sub> of base" with the actual meaning of the pK<sub>a</sub> of the conjugate acid of the respective base.

## 4. X-ray crystallography

X-ray diffraction data for all compounds were obtained on a Bruker Smart Apex II CCD diffractometer, using graphite-monochromated Mo-K $\alpha$  radiation ( $\lambda = 0.71073 \text{ \AA}$ ) at low temperature (150 K for Li-**1**, Na-**3**, and Na-**4**; 100 K for K-**1** and K-**3**). Intensity data were collected using  $\omega$ -steps accumulating area detector images spanning at least a hemisphere of reciprocal space. All the data were corrected for Lorentz polarization effects. A multi-scan absorption correction was applied using SADABS [9]. Structures were solved by direct methods and refined by full-matrix least-squares against  $F^2$  (SHELXTL) [10]. All hydrogen atoms were assigned riding isotropic displacement parameters and constrained to idealized geometries.

The flack parameter in Li-**1** was found to be meaningless, due to weak anomalous scattering by the crystals. In K-**1**, as refined as a pseudo-merohedral twin with a twin law of  $-1\ 0\ 0\ 0\ -1\ 0\ 0\ 0\ 1$  and a refined twin fraction of 0.44. The RIGU command was also used as a general constraint to the ellipsoids of the structure.

Crystallographic data for the five structures are listed in Tables S3 and S4. CCDC-1000501 (Li-**1**), CCDC-1013011 (K-**1**), CCDC-1000506 (Na-**3**), 1000507 (K-**3**) and CCDC-926164 (Na-**4**) contain the supplementary crystallographic data for this paper. These data can be obtained free of charge from the Cambridge Crystallographic Data Centre via [http://www.ccdc.cam.ac.uk/data\\_request/cif](http://www.ccdc.cam.ac.uk/data_request/cif), or from the Cambridge Crystallographic Data Centre, 12 Union Road, Cambridge CB2 1EZ, UK; fax: (+44) 1223-336-033; e-mail: [deposit@ccdc.cam.ac.uk](mailto:deposit@ccdc.cam.ac.uk).



**Table S3.** Crystallographic data for complexes Li-1 and K-1.

|                                                | Li-1                                                             | K-1                                                             |
|------------------------------------------------|------------------------------------------------------------------|-----------------------------------------------------------------|
| Formula                                        | C <sub>16</sub> H <sub>39</sub> LiO <sub>6</sub> Si <sub>3</sub> | C <sub>16</sub> H <sub>39</sub> KO <sub>6</sub> Si <sub>3</sub> |
| Molecular weight                               | 418.68                                                           | 450.84                                                          |
| Crystal size (mm <sup>3</sup> )                | 0.27 × 0.20 × 0.08                                               | 0.48 × 0.39 × 0.15                                              |
| Crystal appearance                             | Colorless chunk                                                  | Colorless block                                                 |
| Crystal system                                 | Monoclinic                                                       | Monoclinic                                                      |
| Space group                                    | <i>Cc</i> (No. 9)                                                | <i>P2<sub>1</sub>/n</i> (No. 14)                                |
| a (Å)                                          | 9.531(5)                                                         | 8.698(6)                                                        |
| b (Å)                                          | 17.403(8)                                                        | 18.417(12)                                                      |
| c (Å)                                          | 15.039(7)                                                        | 16.289(11)                                                      |
| α                                              |                                                                  |                                                                 |
| β (°)                                          | 90.873(6)                                                        | 90.200(10)                                                      |
| γ                                              |                                                                  |                                                                 |
| Volume (Å <sup>3</sup> )                       | 2494(2)                                                          | 2609(3)                                                         |
| Z                                              | 4                                                                | 4                                                               |
| Temperature (K)                                | 150(2)                                                           | 100(2)                                                          |
| μ (mm <sup>-1</sup> )                          | 0.214                                                            | 0.365                                                           |
| θ range (°)                                    | 2.34 to 27.78                                                    | 1.106 to 25.816                                                 |
| Reflections collected                          | 14494                                                            | 26816                                                           |
| Unique reflections ( <i>R</i> <sub>int</sub> ) | 5737 (0.1480)                                                    | 4942 (0.1401)                                                   |
| R1 [ <i>I</i> > 2σ( <i>I</i> )]                | 0.0762                                                           | 0.0699                                                          |
| wR2 indices (all data)                         | 0.1585                                                           | 0.1863                                                          |
| GOF                                            | 0.949                                                            | 0.936                                                           |
| Data/restraints/parameters                     | 5737 / 2 / 244                                                   | 4942 / 369 / 237                                                |

**Table S4.** Crystallographic data for complexes Na-3 and K-3 and Na-4

|                                                | Na-3                                                               | K-3                                                               | Na-4                                                             |
|------------------------------------------------|--------------------------------------------------------------------|-------------------------------------------------------------------|------------------------------------------------------------------|
| Formula                                        | C <sub>15</sub> H <sub>39</sub> GeNaO <sub>6</sub> Si <sub>3</sub> | C <sub>15</sub> H <sub>39</sub> GeKO <sub>6</sub> Si <sub>3</sub> | C <sub>37</sub> H <sub>59</sub> NaO <sub>6</sub> Si <sub>4</sub> |
| Molecular weight                               | 495.31                                                             | 511.42                                                            | 735.19                                                           |
| Crystal size (mm <sup>3</sup> )                | 0.36 × 0.21 × 0.15                                                 | 0.34 × 0.28 × 0.25                                                | 0.37 × 0.21 × 0.07                                               |
| Crystal appearance                             | Yellow prism                                                       | Yellow chunk                                                      | Orange prism                                                     |
| Crystal system                                 | Monoclinic                                                         | Monoclinic                                                        | Monoclinic                                                       |
| Space group                                    | <i>P</i> 2 <sub>1</sub> / <i>c</i> (No. 14)                        | <i>P</i> 2 <sub>1</sub> / <i>n</i> (No. 14)                       | <i>C</i> 2/ <i>c</i> (No. 15)                                    |
| a (Å)                                          | 15.729(2)                                                          | 8.141(2)                                                          | 23.272(4)                                                        |
| b (Å)                                          | 9.9209(13)                                                         | 19.245(6)                                                         | 9.7485(17)                                                       |
| c (Å)                                          | 17.212(2)                                                          | 16.727(5)                                                         | 37.173(6)                                                        |
| α                                              |                                                                    |                                                                   |                                                                  |
| β (°)                                          | 90.3515(14)                                                        | 90.528(4)                                                         | 94.149(2)                                                        |
| γ                                              |                                                                    |                                                                   |                                                                  |
| Volume (Å <sup>3</sup> )                       | 2685.8(6)                                                          | 2620.5(13)                                                        | 8411(3)                                                          |
| Z                                              | 4                                                                  | 4                                                                 | 8                                                                |
| Temperature (K)                                | 150(2)                                                             | 100(2)                                                            | 150(2)                                                           |
| μ (mm <sup>-1</sup> )                          | 1.313                                                              | 1.489                                                             | 0.191                                                            |
| θ range (°)                                    | 2.37 to 27.88                                                      | 1.06 to 27.91                                                     | 1.10 to 27.92                                                    |
| Reflections collected                          | 31353                                                              | 27981                                                             | 49332                                                            |
| Unique reflections ( <i>R</i> <sub>int</sub> ) | 6374 (0.0292)                                                      | 6104 (0.0539)                                                     | 9999 (0.0613)                                                    |
| R1 [ <i>I</i> > 2σ( <i>I</i> )]                | 0.0266                                                             | 0.0960                                                            | 0.0779                                                           |
| wR2 indices (all data)                         | 0.0682                                                             | 0.2175                                                            | 0.1178                                                           |
| GOF                                            | 1.035                                                              | 1.279                                                             | 1.035                                                            |
| Data/restraints/parameters                     | 6374 / 0 / 244                                                     | 6104 / 0 / 245                                                    | 9999 / 0 / 444                                                   |

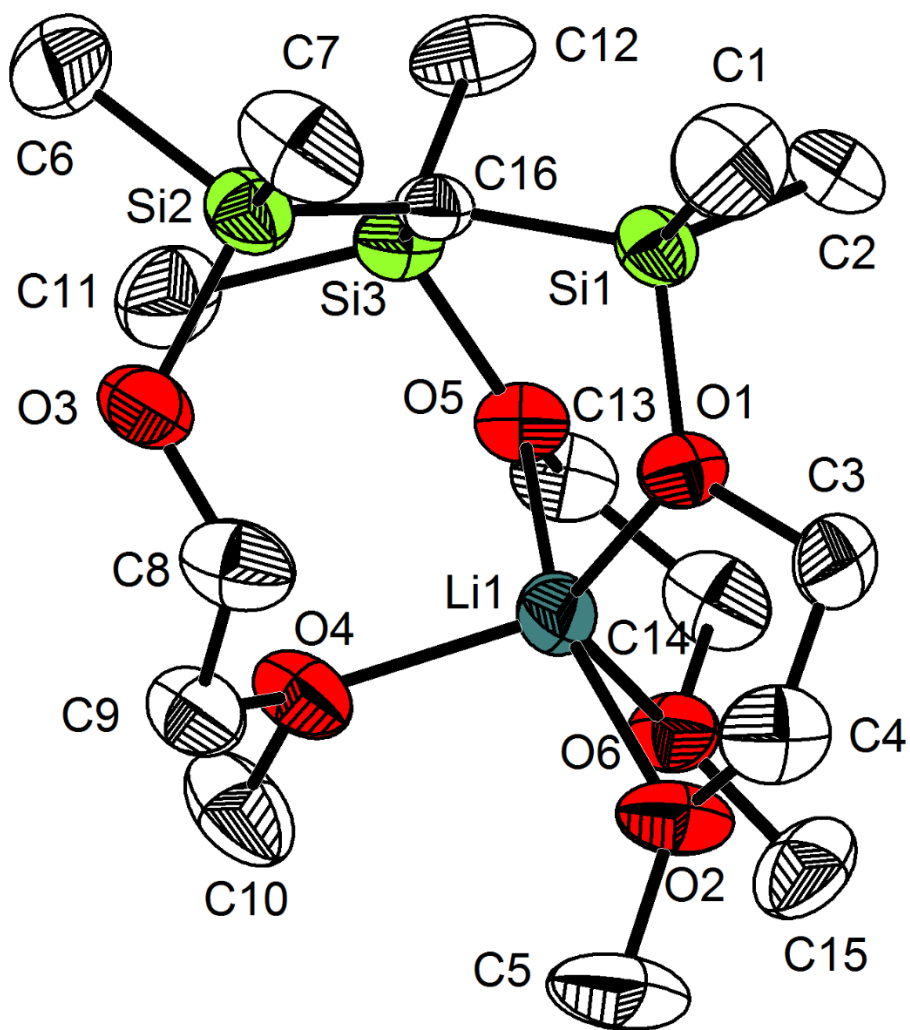

**Figure S1.** Solid-state structure of Li-1.

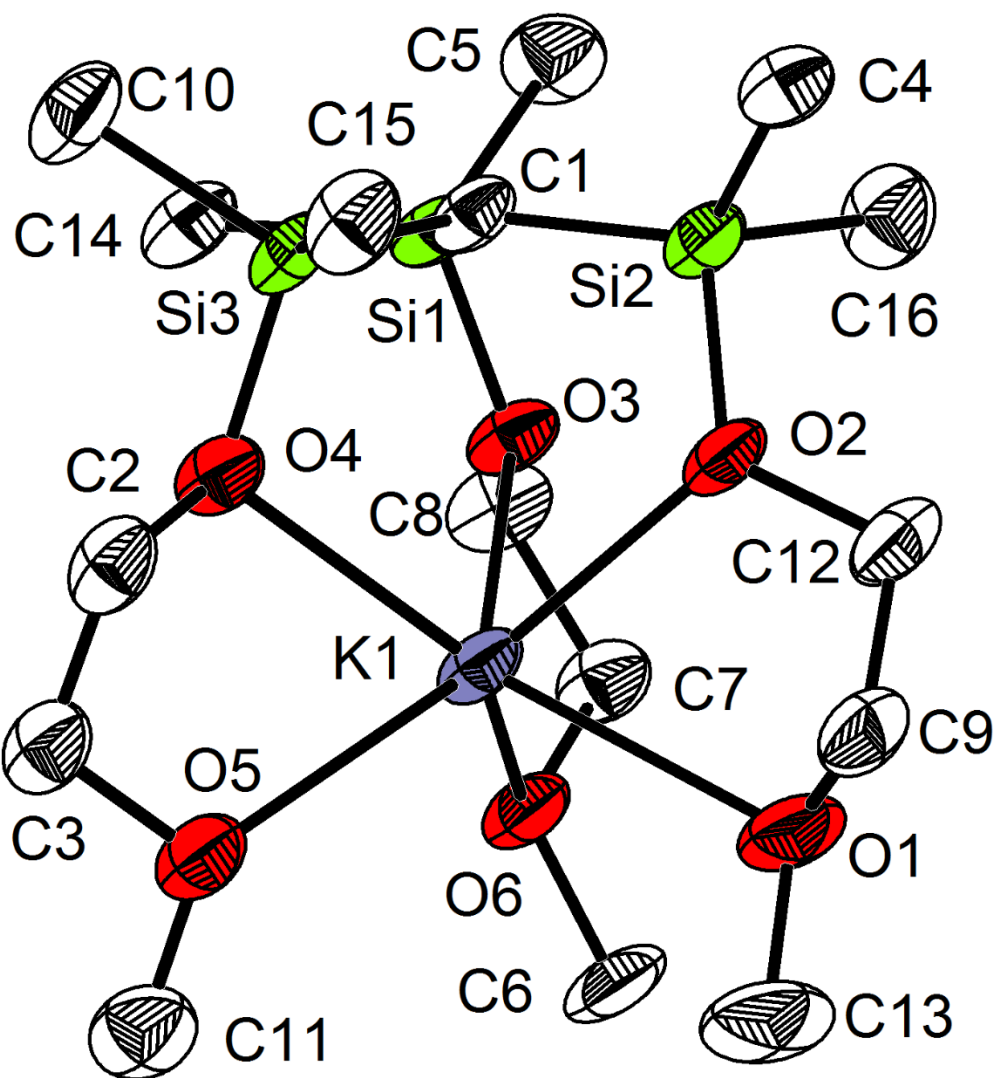

**Figure S2.** Solid-state structure of K-1.

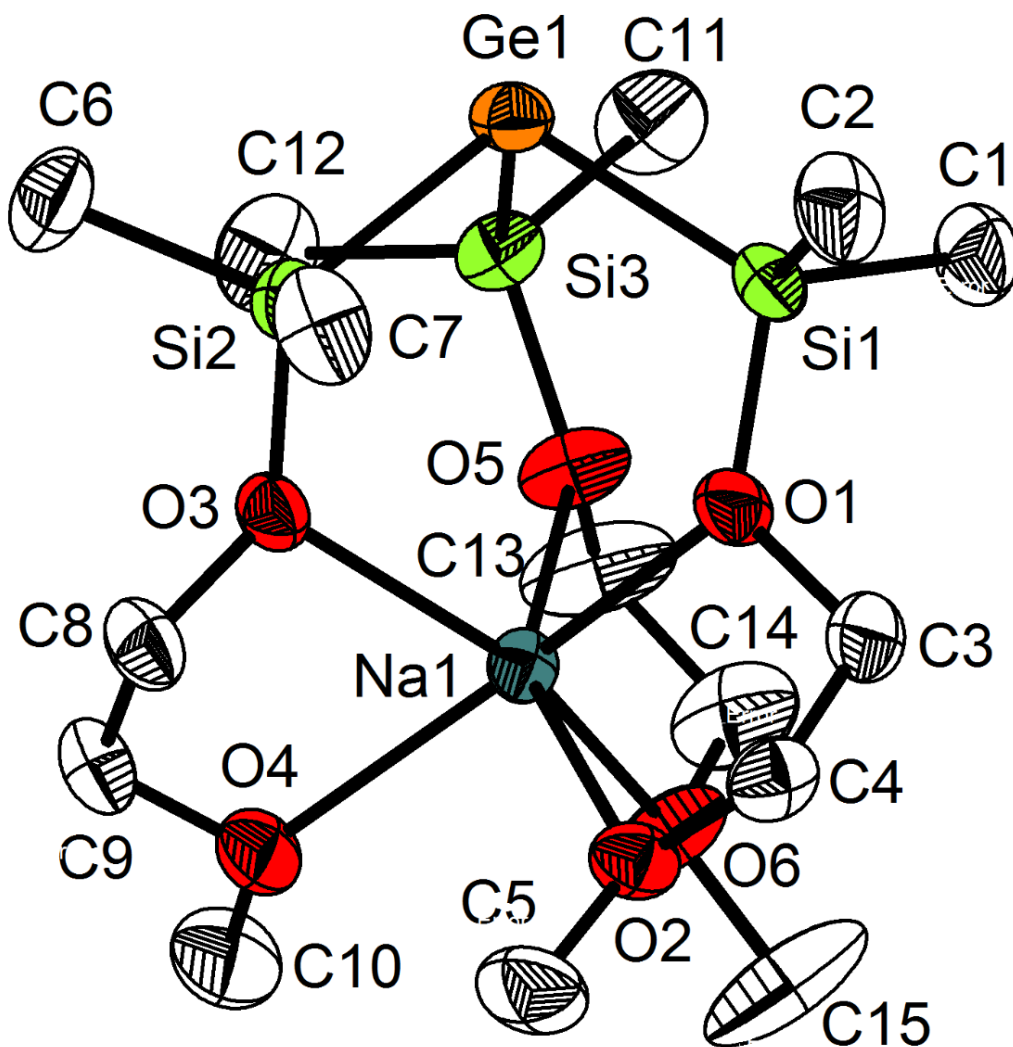

Figure S3. Solid-state structure of Na-3.

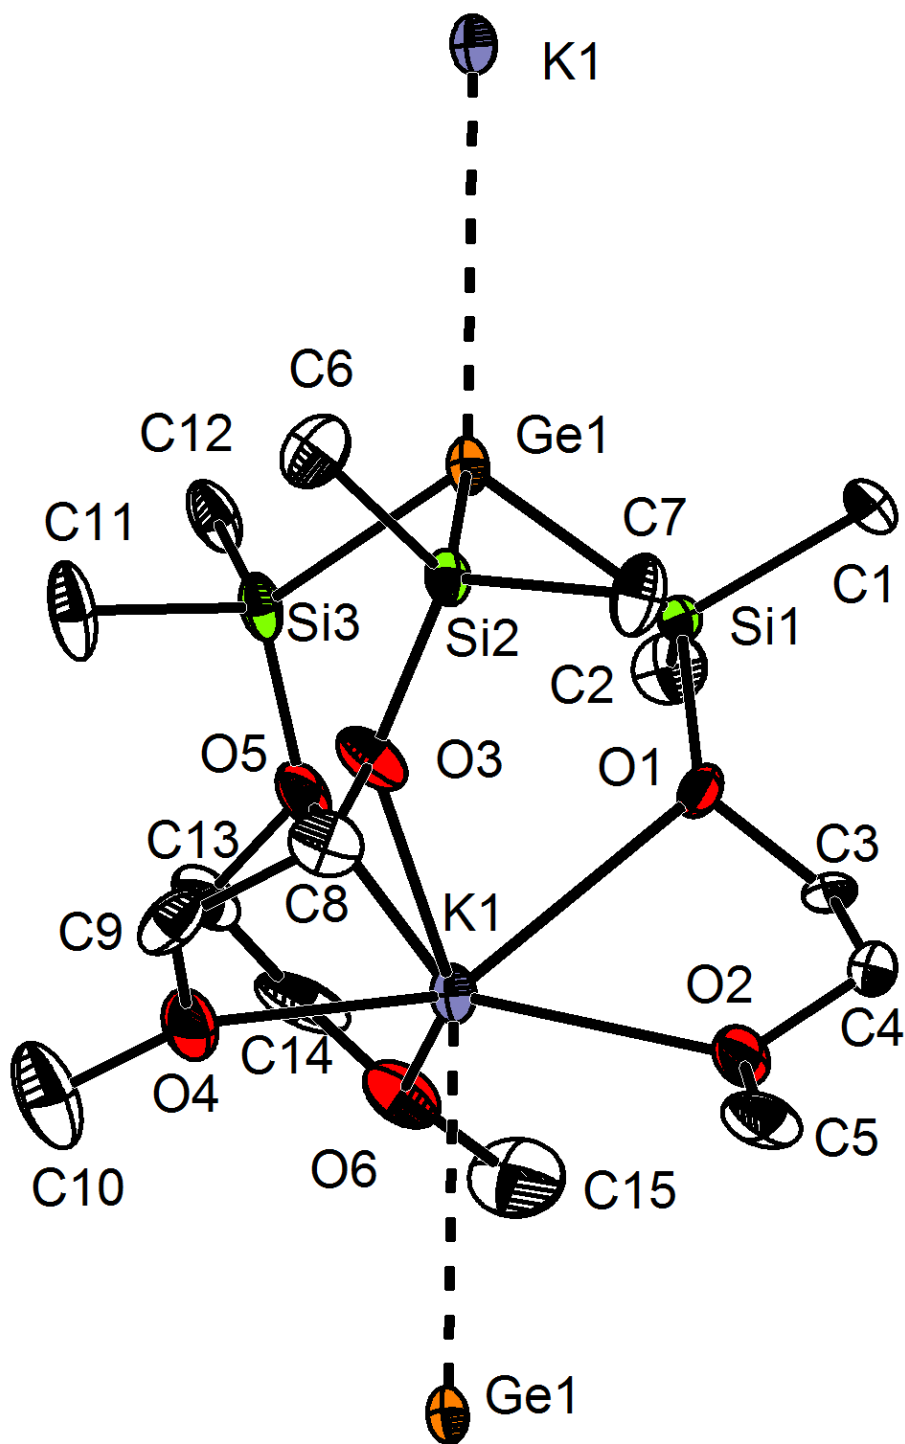

Figure S4. Solid-state structure of K-3.

**Table S5.** Selected average distances [Å] and angles [°] of M-1 –M-3.

| M-1 <sup>b</sup> | Li-1 | Na-1 | K-1  | M-2 <sup>b</sup> | Li-2 | Na-2 | K-2  | M-3 <sup>b</sup> | Na-3 | K-3  |
|------------------|------|------|------|------------------|------|------|------|------------------|------|------|
| CN <sup>a</sup>  | 5    | 6    | 6    | CN               | 6    | 6    | 7    | CN               | 6    | 7    |
| C-Si             | 1.78 | 1.79 | 1.80 | Si-Si            | 2.32 | 2.32 | 2.32 | Ge-Si            | 2.37 | 2.37 |
| Si-O             | 1.71 | 1.70 | 1.70 | Si-O             | 1.69 | 1.68 | 1.68 | Si-O             | 1.68 | 1.67 |
| O-M              | 2.01 | 2.37 | 2.69 | O-M              | 2.08 | 2.32 | 2.74 | O-M              | 2.32 | 2.75 |
| C··M             | 3.30 | 3.23 | 3.32 | Si··M            | 3.92 | 4.00 | 4.50 | Ge··M            | 4.05 | 4.53 |
| Si-C-Si          | 119  | 116  | 119  | Si-Si-Si         | 96   | 99   | 100  | Si-Ge-Si         | 97   | 98   |
| C-Si-O           | 106  | 107  | 108  | Si-Si-O          | 113  | 113  | 113  | Ge-Si-O          | 113  | 114  |
| Si-O-M           | 118  | 110  | 107  | Si-O-M           | 126  | 122  | 125  | Si-O-M           | 123  | 125  |

<sup>a</sup> CN = coordination number; <sup>b</sup> M = metal.

## 5. DFT Calculations

The calculations were performed at density functional theory level through the functional B3-LYP [11] and the TZVP [12, 13] basis set. Geometry optimizations were performed for all systems studied in this work. Gas-phase basicity (GB) and proton affinity (PA) computations were carried out at the same level of theory by means of harmonic vibrational frequency calculations to get corresponding enthalpies and Gibbs free energies. The atomic charges were calculated using natural population analysis [14]. All calculations were performed using the Turbomole [15] suite program. The natural bond orbital (NBO) analysis [16] was performed with the optimized structures of the zwitterions Na-**1**, Na-**2** and Na-**3** (Table 3) at the B3-LYP/def2-TZVP [17, 18] level of theory using Gaussian 9 code [19].



### 5.1. Results of calculations for M-1 and [M-1-H]<sup>+</sup> (M = Li, Na, K)

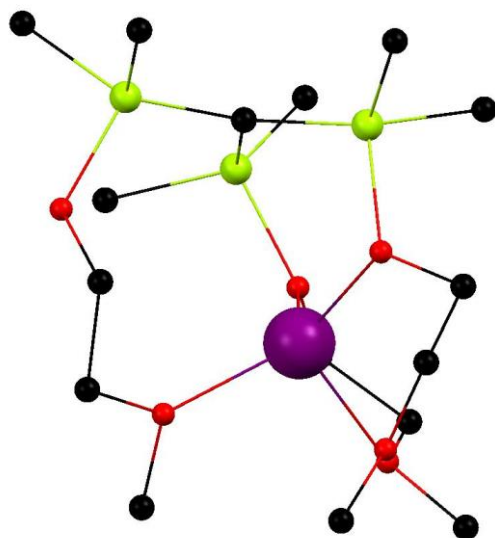

**Figure S5.** Calculated gas-phase structure of Li-1-A (purple = lithium; green = silicon; black = carbon; red = oxygen).

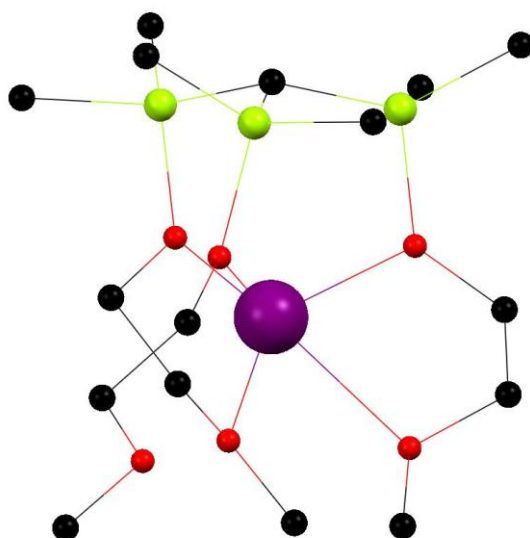

**Figure S6.** Calculated gas-phase structure of Li-1-B (purple = lithium; green = silicon; black = carbon; red = oxygen).

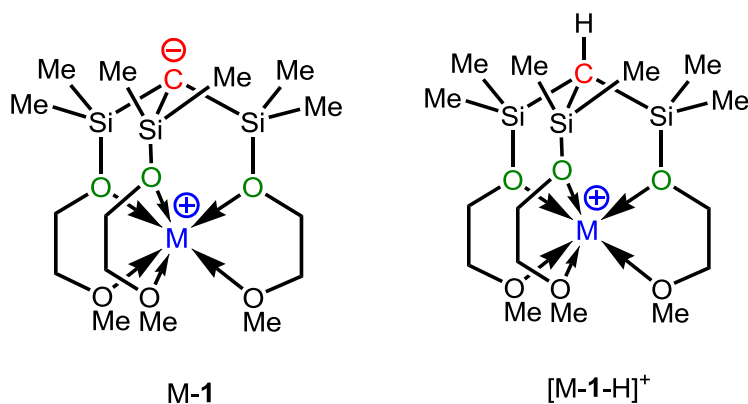

**Table S6.** Calculated average distances [Å] and angles [°] of M-1 and [M-1-H]<sup>+</sup> (M = Li, Na, K).

|          | Li-1-A | Li-1-B | Na-1  | K-1   | [Li-1-H] <sup>+</sup> | [Na-1-H] <sup>+</sup> | [K-1-H] <sup>+</sup> |
|----------|--------|--------|-------|-------|-----------------------|-----------------------|----------------------|
| CN       | 4      | 5      | 6     | 6     | 6                     | 6                     | 6                    |
| C-Si     | 1.81   | 1.81   | 1.81  | 1.81  | 1.90                  | 1.91                  | 1.91                 |
| Si-O     | 1.76   | 1.76   | 1.75  | 1.75  | 1.71                  | 1.71                  | 1.71                 |
| O-M      | 1.98   | 2.07   | 2.38  | 2.75  | 2.19                  | 2.42                  | 2.81                 |
| C··M     | 3.03   | 2.99   | 3.18  | 3.34  | 3.43                  | 3.56                  | 3.88                 |
| Si-C-Si  | 119.5  | 115.6  | 117.4 | 119.2 | 112.5                 | 114.1                 | 115.5                |
| C-Si-O   | -      | 103.9  | 105.1 | 106.6 | 101.6                 | 103.1                 | 105.1                |
| Si-O-M   | -      | 110.2  | 109.7 | 106.8 | 122.1                 | 120.0                 | 119.6                |
| C-Si-O-M | -      | 20.8   | 24.7  | 27.1  | 33.5                  | 34.3                  | 37.2                 |
| C-H      | -      | -      | -     | -     | 1.10                  | 1.10                  | 1.10                 |

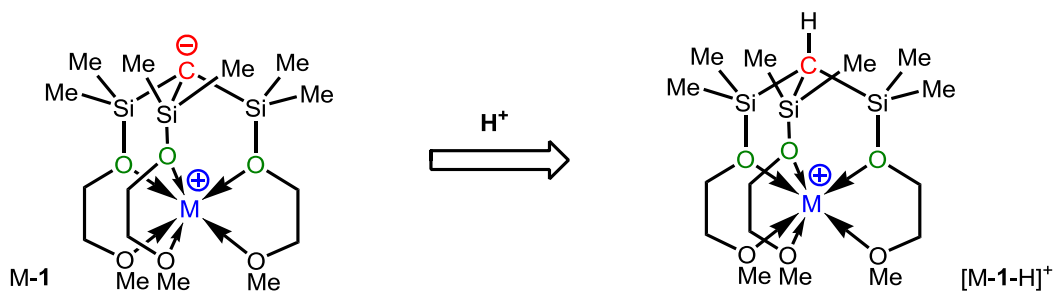

**Table S7.** Calculated absolute energies [au], HOMO energies [eV], gas-phase basicities [GPB in kcal/mol] and proton affinities [PA in kcal/mol] of M-1 and [M-1-H]<sup>+</sup> (M = Li, Na, K).

| Comp.             | Li-1-A                | Li-1-B       | Na-1                  | K-1                  |
|-------------------|-----------------------|--------------|-----------------------|----------------------|
| E                 | -1960.381346          | -1960.381167 | -2115.12458           | -2552.719709         |
| E <sub>HOMO</sub> | -4.402                | -4.469       | -4.335                | -4.256               |
| G                 | -1229864.646          | -1229865.514 | -1326969.934          | -1601567.854         |
| H                 | -1229795.277          | -1229795.459 | -1326898.947          | -1601494.632         |
| GPB               | -282.9                | -282.0       | -282.3                | -280.6               |
| PA                | -291.9                | -291.8       | -290.7                | -289.2               |
| Comp.             | [Li-1-H] <sup>+</sup> | -            | [Na-1-H] <sup>+</sup> | [K-1-H] <sup>+</sup> |
| E                 | -1960.857087          | -            | -2115.598906          | -2553.191823         |
| G                 | -1230153.848          | -            | -1327258.551          | -1601854.708         |
| H                 | -1230085.719          | -            | -1327188.14           | -1601782.359         |

**Table S8.** Calculated NPA charges [e] of M-1 and [M-1-H]<sup>+</sup> (M = Li, Na, K).

| Comp.  | Li-1-A                | Li-1-B                | Na-1                 | K-1    |
|--------|-----------------------|-----------------------|----------------------|--------|
| e (M)  | +0.900                | +0.894                | +0.917               | +0.949 |
| e (C)  | -2.195                | -2.155                | -2.168               | -2.189 |
| e (Si) | +2.087                | +2.081                | +2.082               | +2.089 |
| e (C)  | -1.085                | -1.084                | -1.086               | -1.088 |
| e (O)  | -0.977                | -0.991                | -0.974               | -0.966 |
| Comp.  | [Li-1-H] <sup>+</sup> | [Na-1-H] <sup>+</sup> | [K-1-H] <sup>+</sup> |        |
| e (M)  | +0.896                | +0.918                | +0.953               |        |
| e (C)  | -1.774                | -1.769                | -1.769               |        |
| e (H)  | +0.265                | +0.263                | +0.261               |        |
| e (Si) | +2.085                | +2.080                | +2.082               |        |
| e (C)  | -1.103                | -1.103                | -1.103               |        |
| e (O)  | -0.980                | -0.975                | -0.968               |        |

## 5.2. Results of calculations for M-2 and [M-2-H]<sup>+</sup> (M = Li, Na, K)

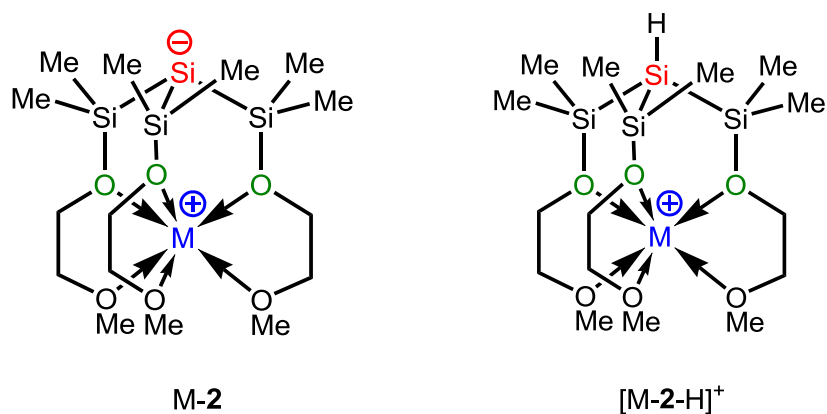

**Table S9.** Calculated average distances [Å] and angles [°] of M-2 and [M-2-H]<sup>+</sup> (M = Li, Na, K).

| Comp.     | Li-2  | Na-2  | K-2   | [Li-2-H] <sup>+</sup> | [Na-2-H] <sup>+</sup> | [K-2-H] <sup>+</sup> |
|-----------|-------|-------|-------|-----------------------|-----------------------|----------------------|
| CN (M)    | 6     | 6     | 6     | 6                     | 6                     | 6                    |
| Si-Si     | 2.35  | 2.35  | 2.35  | 2.36                  | 2.37                  | 2.38                 |
| Si-O      | 1.76  | 1.75  | 1.75  | 1.72                  | 1.72                  | 1.71                 |
| O-M       | 2.07  | 2.35  | 2.71  | 2.27                  | 2.45                  | 2.82                 |
| Si...M    | 3.79  | 3.94  | 4.07  | 3.72                  | 3.74                  | 3.94                 |
| Si-Si-Si  | 97.5  | 101.2 | 105.8 | 107.4                 | 110.0                 | 112.9                |
| Si-Si-O   | 112.3 | 113.6 | 115.7 | 99.9                  | 101.5                 | 104.1                |
| Si-O-M    | 120.5 | 119.9 | 114.4 | 128.3                 | 125.6                 | 122.6                |
| Si-Si-O-M | 21.9  | 21.0  | 21.0  | 29.2                  | 23.7                  | 24.7                 |
| Si-H      | -     | -     | -     | 1.49                  | 1.50                  | 1.50                 |

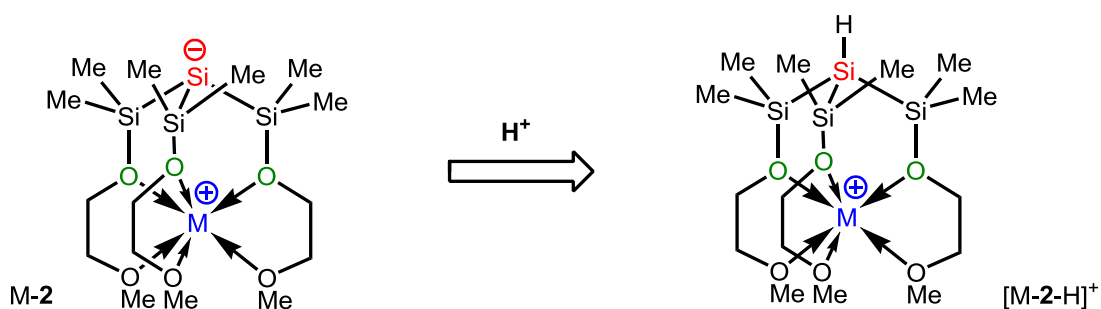

**Table S10.** Calculated absolute energies [au], HOMO energies [eV], gas-phase basicities [GPB in kcal/mol] and proton affinities [PA in kcal/mol] of M-2, and [M-2-H]<sup>+</sup> (M = Li, Na, K).

| Comp.             | Li-2                  | Na-2                  | K-2                  |
|-------------------|-----------------------|-----------------------|----------------------|
| E                 | -2211.745006          | -2366.486518          | -2804.077403         |
| E <sub>HOMO</sub> | -4.200                | -4.013                | -3.837               |
| G                 | -1387602.653          | -1484706.84           | -1759302.046         |
| H                 | -1387530.78           | -1484633.075          | -1759225.98          |
| GPB               | -274.0                | -276.3                | -278.9               |
| PA                | -281.4                | -283.8                | -286.3               |
| Comp.             | [Li-2-H] <sup>+</sup> | [Na-2-H] <sup>+</sup> | [K-2-H] <sup>+</sup> |
| E                 | -2212.201368          | -2366.946799          | -2804.541748         |
| G                 | -1387882.999          | -1484989.394          | -1759587.22          |
| H                 | -1387810.643          | -1484915.362          | -1759510.76          |

**Table S11.** Calculated NPA charges [e] of M-2, and [M-2-H]<sup>+</sup> (M = Li, Na, K).

| Comp.  | Li-2                  | Na-2                  | K-2                  |
|--------|-----------------------|-----------------------|----------------------|
| e (M)  | +0.891                | +0.913                | +0.945               |
| e (E)  | -0.683                | -0.709                | -0.738               |
| e (Si) | +1.584                | +1.581                | +1.581               |
| e (C)  | -1.084                | -1.081                | -1.080               |
| e (O)  | -0.992                | -0.978                | -0.970               |
| Comp.  | [Li-2-H] <sup>+</sup> | [Na-2-H] <sup>+</sup> | [K-2-H] <sup>+</sup> |
| e (M)  | +0.898                | +0.917                | +0.950               |
| e (E)  | -0.139                | -0.153                | -0.171               |
| e (H)  | -0.131                | -0.136                | -0.139               |
| e (Si) | +1.643                | +1.640                | +1.643               |
| e (C)  | -1.085                | -1.084                | -1.085               |
| e (O)  | -0.976                | -0.974                | -0.968               |

### 5.3. Results of calculations for M-3 and [M-3-H]<sup>+</sup> (M = Li, Na, K)

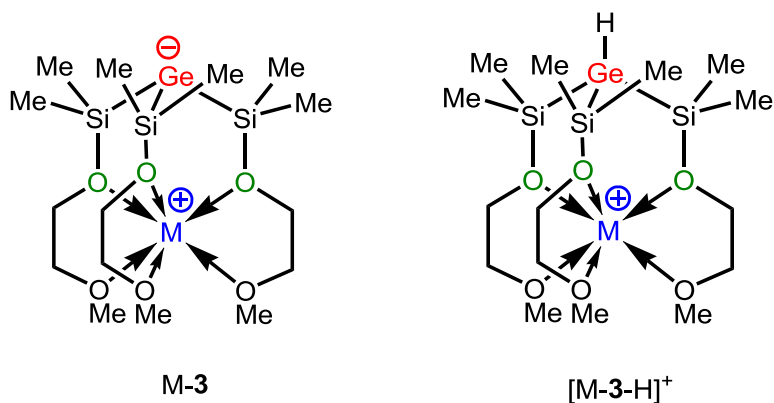

**Table S12.** Calculated average distances [Å] and angles [°] of M-3 and [M-3-H]<sup>+</sup> (M = Li, Na, K).

| Comp.     | Li-3  | Na-3  | K-3   | [Li-3-H] <sup>+</sup> | [Na-3-H] <sup>+</sup> | [K-3-H] <sup>+</sup> |
|-----------|-------|-------|-------|-----------------------|-----------------------|----------------------|
| CN (M)    | 6     | 6     | 6     | 6                     | 6                     | 6                    |
| Ge-Si     | 2.42  | 2.42  | 2.42  | 2.41                  | 2.41                  | 2.42                 |
| Si-O      | 1.76  | 1.75  | 1.75  | 1.72                  | 1.72                  | 1.71                 |
| O-M       | 2.08  | 2.35  | 2.71  | 2.28                  | 2.46                  | 2.82                 |
| Ge...M    | 3.88  | 4.01  | 4.14  | 3.74                  | 3.74                  | 3.93                 |
| Si-Ge-Si  | 95.3  | 99.1  | 103.9 | 107.1                 | 109.7                 | 112.8                |
| Ge-Si-O   | 112.5 | 114.0 | 116.7 | 99.7                  | 101.1                 | 103.6                |
| Si-O-M    | 120.5 | 119.7 | 115.5 | 129.0                 | 125.4                 | 122.2                |
| Ge-Si-O-M | 27.5  | 24.8  | 20.9  | 27.4                  | 24.8                  | 25.0                 |
| Ge-H      | -     | -     | -     | 1.54                  | 1.55                  | 1.55                 |



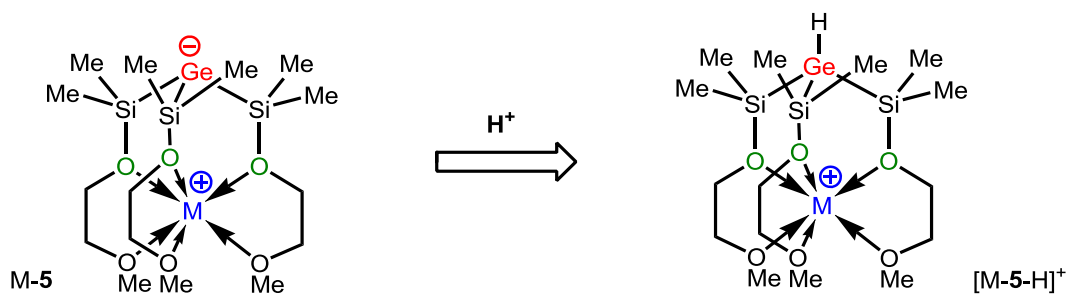

**Table S13.** Calculated absolute energies [au], HOMO energies [eV], gas-phase basicities [GPB in kcal/mol] and proton affinities [PA in kcal/mol] of M-**3** and [M-**3**-H]<sup>+</sup> (M = Li, Na, K).

| Comp.               | Li- <b>3</b>                   | Na- <b>3</b>                   | K- <b>3</b>                   |
|---------------------|--------------------------------|--------------------------------|-------------------------------|
| E                   | -3999.227947                   | -4153.969879                   | -4591.560881                  |
| E <sub>HOMO</sub>   | -4.260                         | -4.082                         | -3.914                        |
| E <sub>HOMO-1</sub> | -5.523                         | -5.506                         | -5.504                        |
| G                   | -2509267.985                   | -2606372.612                   | -2880967.572                  |
| H                   | -2509194.52                    | -2606297.148                   | -2880890.103                  |
| GPB                 | -267.5                         | -269.1                         | -272.7                        |
| PA                  | -276.4                         | -277.8                         | -280.5                        |
| Comp.               | [Li- <b>3</b> -H] <sup>+</sup> | [Na- <b>3</b> -H] <sup>+</sup> | [K- <b>3</b> -H] <sup>+</sup> |
| E                   | -3999.674531                   | -4154.420523                   | -4592.015832                  |
| G                   | -2509541.831                   | -2606648.037                   | -2881246.567                  |
| H                   | -2509468.379                   | -2606573.441                   | -2881169.138                  |

**Table S14.** Calculated NPA charges [e] of M-**3**, and [M-**3**-H]<sup>+</sup> (M = Li, Na, K).

| Comp.  | Li- <b>3</b>                   | Na- <b>3</b>                   | K- <b>3</b>                   |
|--------|--------------------------------|--------------------------------|-------------------------------|
| e (M)  | +0.890                         | +0.912                         | +0.945                        |
| e (E)  | -0.634                         | -0.665                         | -0.698                        |
| e (Si) | +1.578                         | +1.574                         | +1.574                        |
| e (C)  | -1.088                         | -1.085                         | -1.083                        |
| e (O)  | -0.993                         | -0.979                         | -0.971                        |
| Comp.  | [Li- <b>3</b> -H] <sup>+</sup> | [Na- <b>3</b> -H] <sup>+</sup> | [K- <b>3</b> -H] <sup>+</sup> |
| e (M)  | +0.899                         | +0.917                         | +0.949                        |
| e (E)  | -0.141                         | -0.158                         | -0.179                        |
| e (H)  | -0.125                         | -0.127                         | -0.130                        |
| e (Si) | +1.647                         | +1.647                         | +1.651                        |
| e (C)  | -1.088                         | -1.089                         | -1.088                        |
| e (O)  | -0.978                         | -0.977                         | -0.971                        |

#### 5.4. Results of calculations for the metal free anions $1^-$ , $2^-$ , $3^-$ , $1$ , $2$ -H and $3$ -H

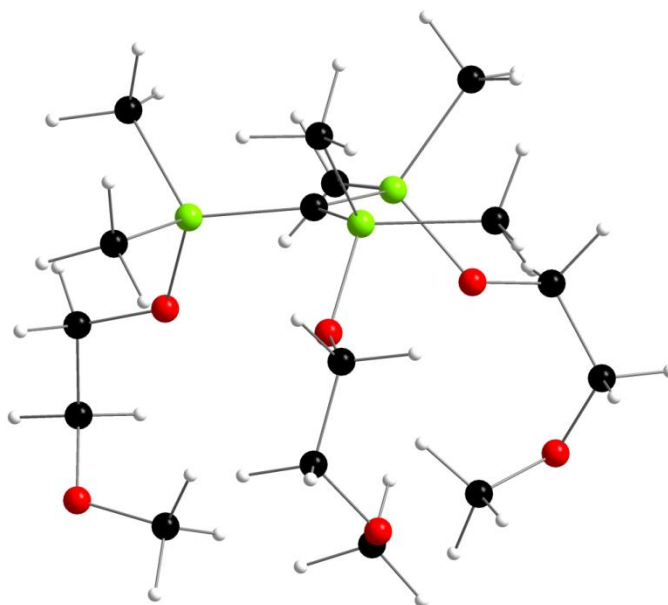

**Figure S7.** Calculated gas-phase structures of  $1^-$ -A (white = hydrogen; green = silicon; black = carbon; red = oxygen).

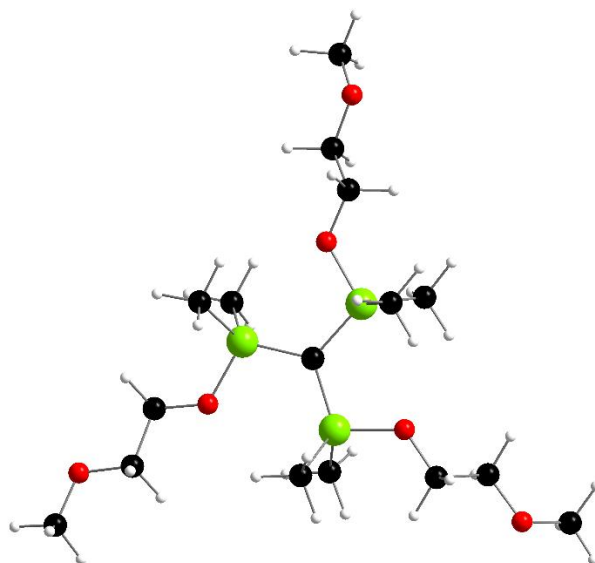

**Figure S8.** Calculated gas-phase structures of  $1^-$ -B (white = hydrogen; green = silicon; black = carbon; red = oxygen).

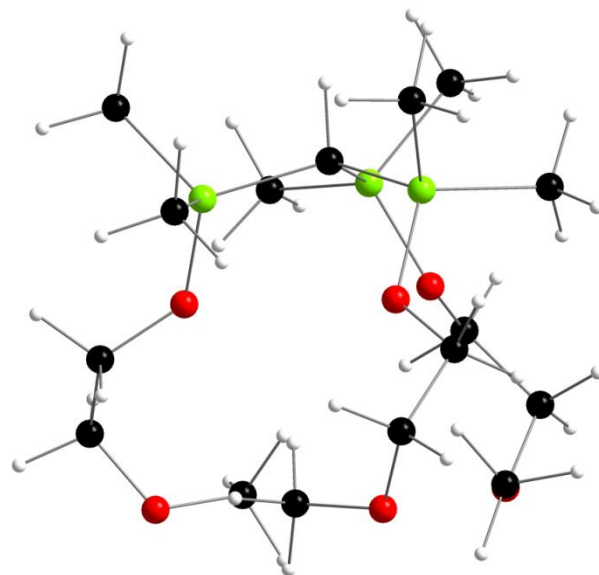

**Figure S9.** Calculated gas-phase structures of **1-A** (white = hydrogen; green = silicon; black = carbon; red = oxygen).

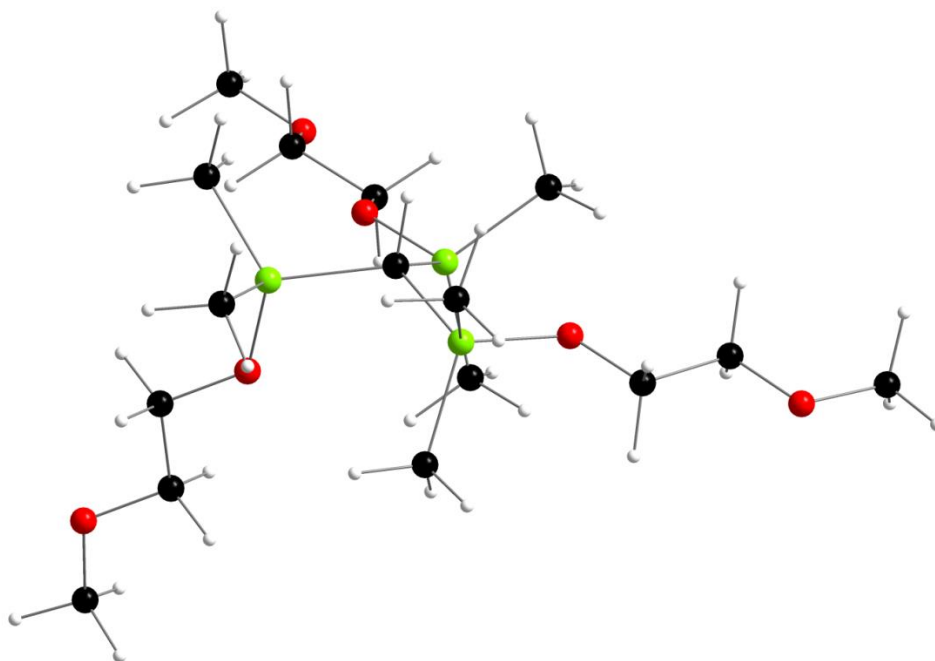

**Figure S10.** Calculated gas-phase structures of **1-B** (white = hydrogen; green = silicon; black = carbon; red = oxygen).

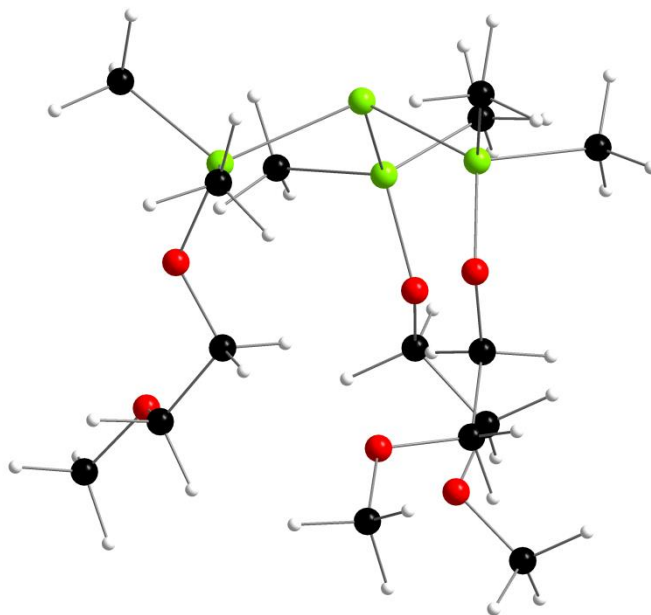

**Figure S11.** Calculated gas-phase structures of  $2^-$ -A (white = hydrogen; green = silicon; black = carbon; red = oxygen).

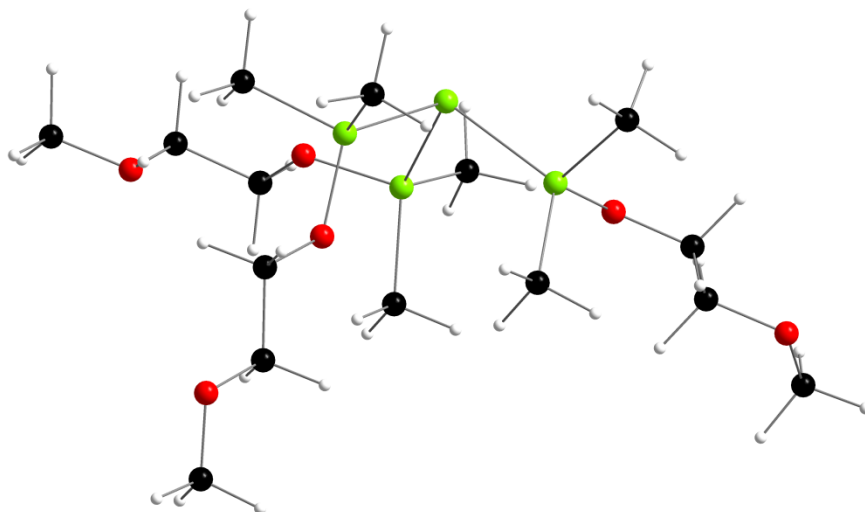

**Figure S12.** Calculated gas-phase structures of  $2^-$ -B (white = hydrogen; green = silicon; black = carbon; red = oxygen).

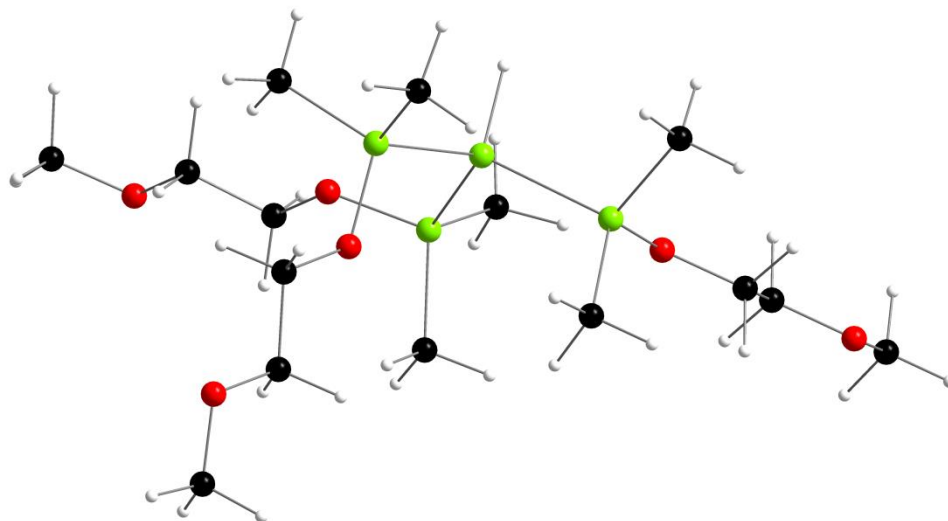

**Figure S13.** Calculated gas-phase structures of **2-H-B** (white = hydrogen; green = silicon; black = carbon; red = oxygen).

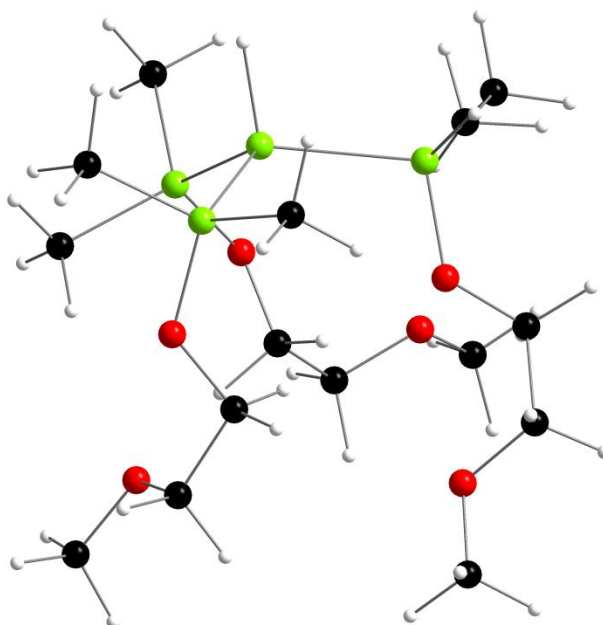

**Figure S14.** Calculated gas-phase structures of **2-H-A** (white = hydrogen; green = silicon; black = carbon; red = oxygen).

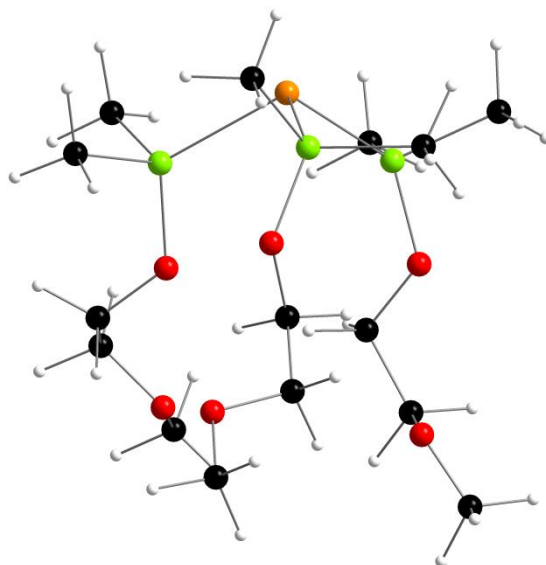

**Figure S15.** Calculated gas-phase structures of  $3^-$ -A (white = hydrogen; green = silicon; black = carbon; red = oxygen; orange = germanium).

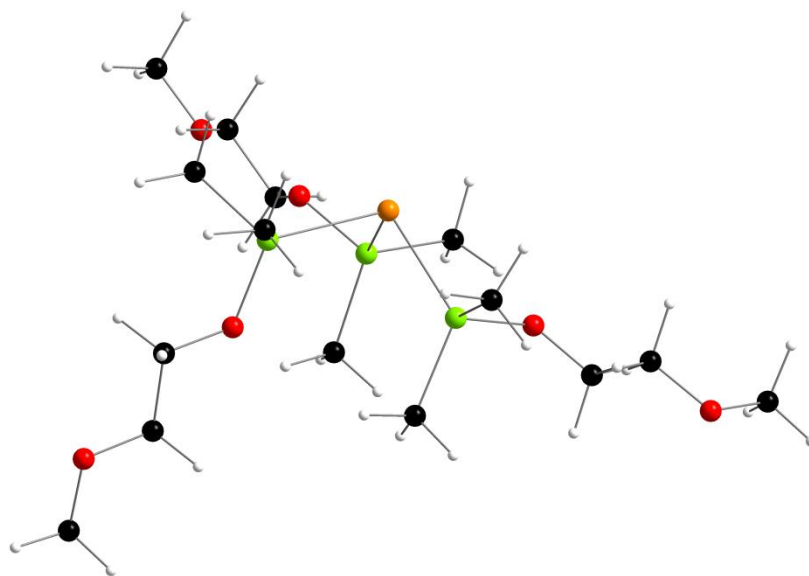

**Figure S16.** Calculated gas-phase structures of  $3^-$ -B (white = hydrogen; green = silicon; black = carbon; red = oxygen; orange = germanium).

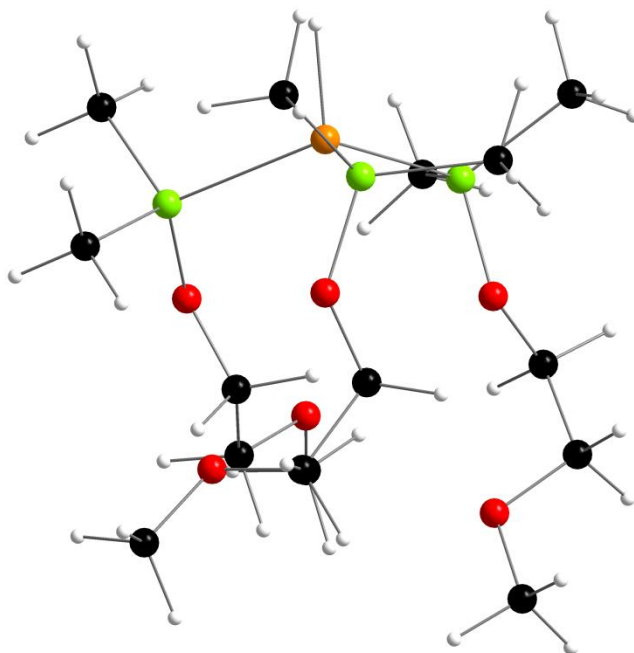

**Figure S17.** Calculated gas-phase structures of **3-H-A** (white = hydrogen; green = silicon; black = carbon; red = oxygen; orange = germanium).

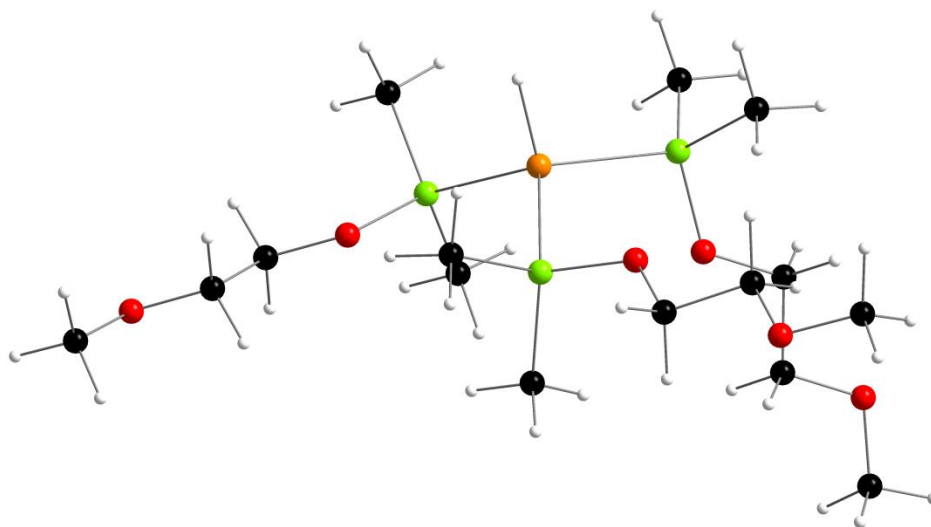

**Figure S18.** Calculated gas-phase structures of **3-H-B** (white = hydrogen; green = silicon; black = carbon; red = oxygen; orange = germanium).



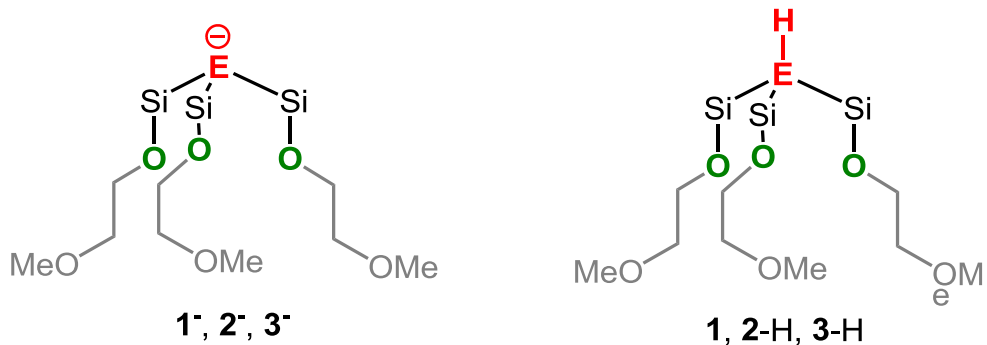

**Table S15.** Calculated average distances [Å] and angles [°] of the metal-free anions, **1<sup>-</sup>**, **2<sup>-</sup>** and **3<sup>-</sup>**, and their conjugated acids **1**, **2-H** and **3-H**.

| Comp.   | <b>1<sup>-</sup>-A</b> | <b>1<sup>-</sup>-B</b> | <b>2<sup>-</sup>-A</b> | <b>2<sup>-</sup>-B</b> | <b>3<sup>-</sup>-A</b> | <b>3<sup>-</sup>-B</b> |
|---------|------------------------|------------------------|------------------------|------------------------|------------------------|------------------------|
| E-Si    | 1.81                   | 1.80                   | 2.36                   | 2.36                   | 2.43                   | 2.43                   |
| Si-O    | 1.73                   | 1.73                   | 1.72                   | 1.73                   | 1.72                   | 1.73                   |
| Si-E-Si | 119.8                  | 120.0                  | 104.9                  | 99.3                   | 103.1                  | 98.2                   |
| E-Si-O  | 110.6                  | 106.9                  | 120.2                  | 110.0                  | 121.6                  | 109.7                  |
| Comp.   | <b>1-A</b>             | <b>1-B</b>             | <b>2-H-A</b>           | <b>2-H-B</b>           | <b>3-H-A</b>           | <b>3-H-B</b>           |
| E-H     | 1.10                   | 1.10                   | 1.51                   | 1.50                   | 1.56                   | 1.55                   |
| E-Si    | 1.91                   | 1.90                   | 2.38                   | 2.37                   | 2.43                   | 2.41                   |
| Si-O    | 1.69                   | 1.69                   | 1.69                   | 1.70                   | 1.69                   | 1.69                   |
| Si-E-Si | 115.4                  | 114.1                  | 113.3                  | 111.7                  | 114.4                  | 112.1                  |
| E-Si-O  | 106.9                  | 105.3                  | 108.9                  | 104.3                  | 108.5                  | 104.1                  |

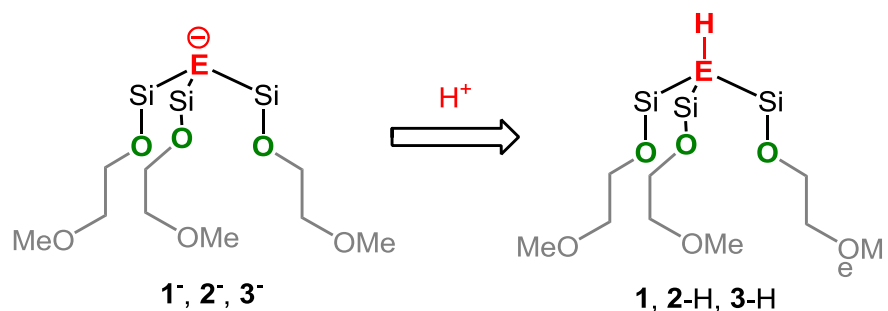

**Table S16.** Calculated absolute energies [au], HOMO energies [eV], gas-phase basicities [GPB in kcal/mol] and proton affinities [PA in kcal/mol] of **1<sup>-</sup>**, **2<sup>-</sup>**, **3<sup>-</sup>**, **1, 2-H** and **3-H**.

| Comp.             | <b>1<sup>-</sup>-B</b> | <b>1<sup>-</sup>-A</b> | <b>2<sup>-</sup>-A</b> | <b>2<sup>-</sup>-B</b> | <b>3<sup>-</sup>-A</b> | <b>3<sup>-</sup>-B</b> |
|-------------------|------------------------|------------------------|------------------------|------------------------|------------------------|------------------------|
| E                 | -1952.81871            | -1952.81745            | -2204.17386            | -2204.17820            | -3991.65716            | -3991.66274            |
| E <sub>HOMO</sub> | -0.9176                | -1.439                 | -0.861                 | -1.111                 | -0.993                 | -1.202                 |
| G                 | -1225128.66            | -1225125.09            | -1382859.48            | -1382864.55            | -2504523.30            | -2504530.00            |
| H                 | -1225055.01            | -1225052.56            | -1382783.23            | -1382785.84            | -2504447.88            | -2504450.58            |
| GPB               | -348.8                 | -                      | -                      | -339.7                 | -                      | -334.9                 |
| PA                | -352.3                 | -                      | -                      | -351.6                 | -                      | -344.3                 |
| Comp.             | <b>1-B</b>             | <b>1-A</b>             | <b>2-H-B</b>           | <b>2-H-A</b>           | <b>3-H-B</b>           | <b>3-H-A</b>           |
| E                 | -1953.39895            | -1953.38706            | -2204.74599            | -2204.74685            | -3992.21956            | -3992.22140            |
| G                 | -1225483.69            | -1225472.96            | -1383214.47            | -1383210.52            | -2504874.93            | -2504871.25            |
| H                 | -1225408.76            | -1225401.41            | -1383135.30            | -1383135.96            | -2504793.36            | -2504793.36            |

**Table S17.** Calculated NPA charges [e] of **1<sup>-</sup>**, **2<sup>-</sup>**, **3<sup>-</sup>**, **1**, **2-H** and **3-H**.

| Comp.  | <b>1<sup>-</sup>-A</b> | <b>1<sup>-</sup>-B</b> | <b>2<sup>-</sup>-A</b> | <b>2<sup>-</sup>-B</b> | <b>3<sup>-</sup>-A</b> | <b>3<sup>-</sup>-B</b> |
|--------|------------------------|------------------------|------------------------|------------------------|------------------------|------------------------|
| e (E)  | -2.188                 | -2.061                 | -0.807                 | -0.709                 | -0.770                 | -0.660                 |
| e (Si) | +2.106                 | +1.984                 | +1.610                 | +1.596                 | +1.603                 | +1.583                 |
| e (C)  | -1.086                 | -1.130                 | -1.084                 | -1.085                 | -1.079                 | -1.084                 |
| e (O)  | -0.943                 | -0.871                 | -0.948                 | -0.944                 | -0.949                 | -0.945                 |
| Comp.  | <b>1-A</b>             | <b>1-B</b>             | <b>2-H-A</b>           | <b>2-H-B</b>           | <b>3-H-A</b>           | <b>3-H-B</b>           |
| e (E)  | -1.766                 | -1.762                 | -0.206                 | -0.141                 | -0.220                 | -0.146                 |
| e (H)  | +0.249                 | +0.256                 | -0.161                 | -0.156                 | -0.153                 | -0.149                 |
| e (Si) | +2.096                 | +2.089                 | +1.664                 | +1.650                 | +1.672                 | +1.657                 |
| e (C)  | -1.101                 | -1.099                 | -1.082                 | -1.081                 | -1.088                 | -1.085                 |
| e (O)  | -0.953                 | -0.950                 | -0.945                 | -0.946                 | -0.946                 | -0.949                 |

## 5.5. Results of calculations for the metal free anions $7^-$ , $8^-$ , $9^-$ , 7-H, 8-H and 9-H

**Table S18.** Calculated av. distances [Å] and angles [°] of  $\bar{E}(\text{SiMe}_3)_3$  and  $\text{HE}(\text{SiMe}_3)_3$  (E = C, Si, Ge).

| Compound           | $\bar{\text{C}}(\text{SiMe}_3)_3$ ( <b>7<sup>-</sup></b> ) | $\bar{\text{Si}}(\text{SiMe}_3)_3$ ( <b>8<sup>-</sup></b> ) | $\bar{\text{Ge}}(\text{SiMe}_3)_3$ ( <b>9<sup>-</sup></b> ) |
|--------------------|------------------------------------------------------------|-------------------------------------------------------------|-------------------------------------------------------------|
| E-Si               | 1.83                                                       | 2.38                                                        | 2.45                                                        |
| Si-CH <sub>3</sub> | 1.93                                                       | 1.93                                                        | 1.93                                                        |
| Si-E-Si            | 119.7                                                      | 102.0                                                       | 100.3                                                       |
| Comp.              | $\text{HC}(\text{SiMe}_3)_3$ ( <b>7-H</b> )                | $\text{HSi}(\text{SiMe}_3)_3$ ( <b>8-H</b> )                | $\text{HGe}(\text{SiMe}_3)_3$ ( <b>9-H</b> )                |
| E-Si               | 1.92                                                       | 2.38                                                        | 2.43                                                        |
| Si-CH <sub>3</sub> | 1.90                                                       | 1.90                                                        | 1.90                                                        |
| Si-E-Si            | 114.8                                                      | 113.0                                                       | 113.5                                                       |

**Table S19.** Calculated NPA charges [e] of  $\bar{E}(\text{SiMe}_3)_3$  and  $\text{HE}(\text{SiMe}_3)_3$  (E = C, Si, Ge).

| Compound | $\bar{\text{C}}(\text{SiMe}_3)_3$ ( <b>6<sup>-</sup></b> ) | $\bar{\text{Si}}(\text{SiMe}_3)_3$ ( <b>7<sup>-</sup></b> ) | $\bar{\text{Ge}}(\text{SiMe}_3)_3$ ( <b>8<sup>-</sup></b> ) |
|----------|------------------------------------------------------------|-------------------------------------------------------------|-------------------------------------------------------------|
| e (E)    | -2.124                                                     | -0.678                                                      | -0.654                                                      |
| e (Si)   | +1.867                                                     | +1.325                                                      | +1.322                                                      |
| e (C)    | -1.052                                                     | -1.042                                                      | -1.044                                                      |
| Comp.    | $\text{HC}(\text{SiMe}_3)_3$ ( <b>6-H</b> )                | $\text{HSi}(\text{SiMe}_3)_3$ ( <b>7-H</b> )                | $\text{HGe}(\text{SiMe}_3)_3$ ( <b>8-H</b> )                |
| e (E)    | -1.691                                                     | -0.105                                                      | -0.128                                                      |
| e (H)    | +0.248                                                     | -0.160                                                      | -0.152                                                      |
| e (Si)   | +1.813                                                     | +1.359                                                      | +1.373                                                      |
| e (C)    | -1.061                                                     | -1.041                                                      | -1.044                                                      |

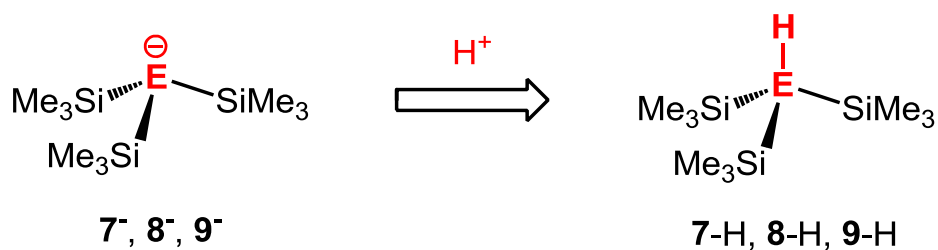

**Table S20.** Calculated absolute energies [au], HOMO energies [eV], gas-phase basicities [ $\Delta G_B$  in kcal/mol] and proton affinities [ $\Delta H_{PA}$  in kcal/mol] of  $\text{E}^-(\text{SiMe}_3)_3$  and  $\text{HE}(\text{SiMe}_3)_3$  (E = C, Si, Ge).

| Comp.             | $\text{C}^-(\text{SiMe}_3)_3$ ( <b>7<sup>-</sup></b> ) | $\text{Si}^-(\text{SiMe}_3)_3$ ( <b>8<sup>-</sup></b> ) | $\text{Ge}^-(\text{SiMe}_3)_3$ ( <b>9<sup>-</sup></b> ) |
|-------------------|--------------------------------------------------------|---------------------------------------------------------|---------------------------------------------------------|
| E                 | -1265.672843                                           | -1517.049041                                            | -3304.533534                                            |
| $E_{\text{HOMO}}$ | -0.590                                                 | -0.682                                                  | -0.778                                                  |
| G                 | -794044.9347                                           | -951790.7426                                            | -2073457.08                                             |
| H                 | -793996.7535                                           | -951739.3945                                            | -2073404.219                                            |
| GPB               | -355.1                                                 | -349.3                                                  | -342.8                                                  |
| PA                | -364.1                                                 | -356.7                                                  | -350.4                                                  |
| Comp.             | $\text{HC}(\text{SiMe}_3)_3$ ( <b>7-H</b> )            | $\text{HSi}(\text{SiMe}_3)_3$ ( <b>8-H</b> )            | $\text{HGe}(\text{SiMe}_3)_3$ ( <b>9-H</b> )            |
| E                 | -1266.265089                                           | -1517.625792                                            | -3305.100080                                            |
| G                 | -794406.2862                                           | -952146.3907                                            | -2073806.2220                                           |
| H                 | -794359.3980                                           | -952094.5646                                            | -2073753.1050                                           |

## 5.6. B3-LYP/TZVP Cartesian coordinates [Å]

[Li(MeOCH<sub>2</sub>CH<sub>2</sub>OSiMe<sub>2</sub>)<sub>3</sub>C] (Li-1-B)

|    |            |            |            |
|----|------------|------------|------------|
| C  | 2.8044057  | -2.9873036 | -0.7144778 |
| Si | 1.5040104  | -2.0489628 | 0.3100591  |
| C  | 1.9498073  | -2.4685070 | 2.1123918  |
| C  | -0.2290699 | -2.1462751 | -0.2051599 |
| Si | -0.5962621 | -1.4952465 | -1.8539048 |
| C  | 0.7413739  | -1.6200041 | -3.2043720 |
| O  | 1.8835582  | -0.3412097 | 0.1563348  |
| C  | 3.1307590  | 0.3073851  | 0.2636071  |
| C  | 3.1848193  | 1.4325389  | -0.7524372 |
| O  | 2.0393972  | 2.2578648  | -0.5686030 |
| C  | 1.9561665  | 3.3101221  | -1.5169777 |
| O  | -0.7974054 | 0.2370680  | -1.6104520 |
| C  | -1.2228323 | 1.1688204  | -2.5843193 |
| C  | -2.1063653 | 2.2201460  | -1.9446328 |
| O  | -1.3690893 | 2.8836072  | -0.9272248 |
| C  | -2.1495381 | 3.8045418  | -0.1878972 |
| C  | -2.1781274 | -2.1059342 | -2.7193539 |
| Si | -1.4500194 | -1.7527944 | 1.0725542  |
| C  | -1.5044644 | -2.8336606 | 2.6365332  |
| O  | -0.9900669 | -0.1417067 | 1.5974935  |
| C  | -1.5857254 | 0.6560065  | 2.5948484  |
| C  | -0.5364795 | 1.5971406  | 3.1512199  |
| O  | 0.0594667  | 2.2972898  | 2.0638474  |
| C  | 1.0740926  | 3.1967605  | 2.4800905  |
| C  | -3.2796994 | -1.5830867 | 0.5708823  |
| Li | 0.1686381  | 0.7924400  | 0.1525829  |

|   |            |            |            |
|---|------------|------------|------------|
| H | -2.5156563 | 4.6211925  | -0.8245945 |
| H | -1.5125681 | 4.2108718  | 0.5951933  |
| H | -3.0125962 | 3.3121729  | 0.2781088  |
| H | 1.8561065  | 2.6770540  | 3.0480323  |
| H | 0.6597738  | 3.9968350  | 3.1070415  |
| H | 1.5154855  | 3.6205257  | 1.5815604  |
| H | 2.7837782  | 4.0205555  | -1.3935809 |
| H | 1.0050261  | 3.8123502  | -1.3544239 |
| H | 1.9803533  | 2.9201905  | -2.5421826 |
| H | -1.9841297 | 0.0551348  | 3.4223250  |
| H | -2.4178199 | 1.2366359  | 2.1747318  |
| H | -0.9965253 | 2.3046462  | 3.8563496  |
| H | 0.2339054  | 1.0257341  | 3.6861260  |
| H | 2.7679031  | -2.7629186 | -1.7796538 |
| H | 2.6272037  | -4.0602117 | -0.5971306 |
| H | 3.8196438  | -2.7884072 | -0.3572513 |
| H | 3.0234960  | -2.3217367 | 2.2651116  |
| H | 1.7258331  | -3.5112240 | 2.3488522  |
| H | 1.4221509  | -1.8342856 | 2.8263229  |
| H | -3.0818937 | -1.9627216 | -2.1282218 |
| H | -2.0741594 | -3.1784386 | -2.9064514 |
| H | -2.3246204 | -1.6226753 | -3.6902384 |
| H | -3.8774453 | -1.3154412 | 1.4478824  |
| H | -3.6732295 | -2.5260312 | 0.1847066  |
| H | -3.4358077 | -0.8128787 | -0.1860273 |
| H | -1.7985421 | 0.6861230  | -3.3832239 |
| H | -0.3555900 | 1.6540900  | -3.0497866 |
| H | 3.9692854  | -0.3726462 | 0.0707883  |
| H | 3.2598782  | 0.7152071  | 1.2748262  |

|   |            |            |            |
|---|------------|------------|------------|
| H | -2.4422426 | 2.9395464  | -2.7070918 |
| H | -2.9936298 | 1.7410305  | -1.5090455 |
| H | -0.5315665 | -2.9658453 | 3.1073469  |
| H | -1.8768936 | -3.8249484 | 2.3630009  |
| H | -2.1931337 | -2.4251564 | 3.3829016  |
| H | 4.1061471  | 2.0189195  | -0.6225386 |
| H | 3.1787349  | 1.0181167  | -1.7694576 |
| H | 0.3784439  | -1.1493102 | -4.1232477 |
| H | 0.9737864  | -2.6608451 | -3.4411306 |
| H | 1.6682625  | -1.1202211 | -2.9183602 |

[Li(MeOCH<sub>2</sub>CH<sub>2</sub>OSiMe<sub>2</sub>)<sub>3</sub>C] (Li-1-A)

|    |           |           |            |
|----|-----------|-----------|------------|
| Si | 5.0819167 | 2.4672337 | 0.4727102  |
| Si | 4.5038025 | 2.0419805 | -2.6379024 |
| Si | 2.3654294 | 3.2673071 | -0.7177749 |
| O  | 5.8743148 | 4.0589987 | 0.4585579  |
| O  | 7.2751430 | 6.5166738 | 0.1817138  |
| O  | 4.8271404 | 3.4520900 | -3.5908931 |
| O  | 4.7790507 | 6.2081760 | -2.2544933 |
| O  | 2.7854033 | 4.8167354 | -0.0018584 |
| O  | 3.9155643 | 7.0362011 | 0.9226983  |
| C  | 6.5215031 | 1.2222707 | 0.5507478  |
| H  | 6.1368076 | 0.2091841 | 0.4113266  |
| H  | 7.0091267 | 1.2487756 | 1.5292930  |
| H  | 7.2826141 | 1.3909077 | -0.2113676 |
| C  | 4.2961936 | 2.3995938 | 2.2071859  |
| H  | 3.8181932 | 1.4318776 | 2.3785745  |
| H  | 3.5446841 | 3.1775325 | 2.3498670  |



|   |           |           |            |
|---|-----------|-----------|------------|
| H | 5.0621315 | 2.5285648 | 2.9782798  |
| C | 6.9226019 | 4.4429932 | 1.3302160  |
| H | 7.4634555 | 3.5698925 | 1.7122998  |
| H | 6.5204624 | 4.9855707 | 2.1955333  |
| C | 7.9210056 | 5.3220981 | 0.6060360  |
| H | 8.7580824 | 5.5623699 | 1.2785707  |
| H | 8.3214337 | 4.7845983 | -0.2641969 |
| C | 8.1105013 | 7.3451245 | -0.6053667 |
| H | 8.9984196 | 7.6685650 | -0.0463965 |
| H | 7.5297034 | 8.2238470 | -0.8849203 |
| H | 8.4406529 | 6.8314360 | -1.5171963 |
| C | 3.2339917 | 1.1574813 | -3.7337408 |
| H | 2.3314890 | 1.7461229 | -3.8963764 |
| H | 2.9395606 | 0.2069228 | -3.2809731 |
| H | 3.6723112 | 0.9467235 | -4.7128399 |
| C | 6.0958814 | 1.0020447 | -2.7789875 |
| H | 6.9847917 | 1.5200050 | -2.4133959 |
| H | 6.2632351 | 0.7691399 | -3.8345058 |
| H | 6.0171855 | 0.0580949 | -2.2358920 |
| C | 5.8973619 | 4.3149151 | -3.3103970 |
| H | 6.7105000 | 4.1523729 | -4.0333882 |
| H | 6.3205407 | 4.1509155 | -2.3086239 |
| C | 5.4926414 | 5.7711421 | -3.4208085 |
| H | 6.3862025 | 6.4004914 | -3.5398139 |
| H | 4.8552048 | 5.9005055 | -4.3026782 |
| C | 4.1891786 | 7.4899623 | -2.4378169 |
| H | 3.4224328 | 7.4562284 | -3.2198147 |
| H | 4.9462726 | 8.2331519 | -2.7172626 |
| H | 3.7376700 | 7.7797247 | -1.4914150 |

|    |           |           |            |
|----|-----------|-----------|------------|
| C  | 1.3512940 | 3.7225264 | -2.2599282 |
| H  | 1.9778095 | 4.1225200 | -3.0588257 |
| H  | 0.6069636 | 4.4805199 | -1.9959691 |
| H  | 0.8049884 | 2.8619015 | -2.6515652 |
| C  | 1.1087265 | 2.4968452 | 0.4880474  |
| H  | 1.5279495 | 2.3168396 | 1.4788794  |
| H  | 0.7908000 | 1.5300048 | 0.0880195  |
| H  | 0.2096329 | 3.1111565 | 0.6006801  |
| C  | 1.9153995 | 5.8242073 | 0.4619173  |
| H  | 1.0154108 | 5.4097724 | 0.9318180  |
| H  | 1.5915460 | 6.4643608 | -0.3691848 |
| C  | 2.6615732 | 6.6514441 | 1.4898715  |
| H  | 2.0790666 | 7.5414812 | 1.7640292  |
| H  | 2.8414913 | 6.0593433 | 2.3962686  |
| C  | 4.6848334 | 7.8577509 | 1.7934400  |
| H  | 4.1940241 | 8.8253751 | 1.9510927  |
| H  | 5.6563876 | 7.9979543 | 1.3270762  |
| H  | 4.8258306 | 7.3708347 | 2.7659600  |
| C  | 3.9686704 | 2.4574034 | -0.9439292 |
| Li | 4.6501675 | 5.3529370 | -0.3914053 |

[Li(MeOCH<sub>2</sub>CH<sub>2</sub>OSiMe<sub>2</sub>)<sub>3</sub>CH]<sup>+</sup> [Li-1-H]<sup>+</sup>

|    |            |           |            |
|----|------------|-----------|------------|
| C  | -0.2624048 | 2.7352742 | -3.1100635 |
| Si | -0.8472632 | 1.7225967 | -1.6289982 |
| C  | -2.7338026 | 1.7421197 | -1.6785278 |
| C  | -0.0164466 | 2.2707721 | -0.0067111 |
| Si | 1.8122772  | 1.7494118 | 0.0863716  |
| C  | 2.7950545  | 1.7796066 | -1.5240891 |

O -0.3176996 0.1014013 -1.7544471  
C -0.5254708 -0.7379649 -2.8869115  
C 0.6018431 -1.7446409 -2.9582959  
O 0.6953715 -2.4029239 -1.6971590  
C 1.6767941 -3.4382485 -1.6884902  
O 1.6812258 0.1274845 0.6124201  
C 2.7760765 -0.6947870 1.0059333  
C 2.2807053 -1.7149841 2.0076189  
O 1.1592172 -2.3901726 1.4430258  
C 0.6777048 -3.4467564 2.2721245  
C 2.7854233 2.7806223 1.3313709  
Si -1.0042653 1.7401334 1.5314437  
C -2.5891405 2.7419154 1.7442662  
O -1.3647196 0.1105675 1.1593403  
C -2.2434283 -0.7261828 1.9055714  
C -2.8529266 -1.7469823 0.9696672  
O -1.7969121 -2.4054683 0.2735347  
C -2.2651389 -3.4626904 -0.5624235  
C -0.1036097 1.7936870 3.1883266  
Li 0.0102470 -1.1589131 0.0073910  
H 1.4389875 -4.2248553 2.3911627  
H -0.2003535 -3.8611497 1.7843777  
H 0.3978286 -3.0716072 3.2628307  
H -2.9907788 -3.0921688 -1.2953082  
H -2.7373811 -4.2499420 0.0344414  
H -1.4005981 -3.8641408 -1.0843439  
H 1.4119702 -4.2308880 -2.3959536  
H 1.7083110 -3.8401677 -0.6794749  
H 2.6648807 -3.0448364 -1.9525510

H -3.0526536 -0.1544914 2.3720595  
H -1.6836262 -1.2303559 2.7002561  
H -3.4411879 -2.4705589 1.5479178  
H -3.5202275 -1.2582683 0.2485207  
H 0.8150463 2.7043076 -3.2666598  
H -0.5481722 3.7813557 -2.9654914  
H -0.7493888 2.4034400 -4.0307660  
H -3.0693280 1.3841857 -2.6562240  
H -3.1254553 2.7554643 -1.5615693  
H -3.1856736 1.1079426 -0.9162576  
H 2.3829287 2.7429381 2.3427082  
H 2.7839558 3.8265546 1.0110046  
H 3.8317678 2.4670642 1.3693002  
H -0.7800829 1.4461164 3.9745611  
H 0.1876503 2.8135576 3.4506475  
H 0.7855485 1.1648051 3.2071915  
H 3.5772071 -0.1107029 1.4712819  
H 3.1909376 -1.2000536 0.1276820  
H -0.5408224 -0.1655136 -3.8204153  
H -1.4862353 -1.2540576 -2.7902306  
H 3.0835064 -2.4275060 2.2341496  
H 1.9820657 -1.2232185 2.9418764  
H -3.2619286 2.6825184 0.8898014  
H -2.3339964 3.7950200 1.8946205  
H -3.1400930 2.4246005 2.6334633  
H 0.3977717 -2.4695230 -3.7562110  
H 1.5515785 -1.2431230 -3.1831890  
H 3.8152931 1.4374603 -1.3277615  
H 2.8726770 2.7932837 -1.9244803

H 2.3674073 1.1365556 -2.2927176  
H -0.0220404 3.3694421 -0.0134378

[Na(MeOCH<sub>2</sub>CH<sub>2</sub>OSiMe<sub>2</sub>)<sub>3</sub>C] (Na-1)

C 2.7202967 -2.8437979 -1.5066044  
Si 1.7799162 -1.8251656 -0.2020030  
C 2.8908534 -1.9005479 1.3441689  
C 0.0084393 -2.1345868 0.0126983  
Si -1.0659571 -1.8549662 -1.4182682  
C -0.2819299 -1.9562483 -3.1521224  
O 1.8929297 -0.1585814 -0.7344601  
C 3.0535719 0.5926642 -0.9949760  
C 2.6993035 1.7625645 -1.8912078  
O 1.6760402 2.5443118 -1.2733080  
C 1.2815097 3.6469868 -2.0738111  
O -1.5927230 -0.1889447 -1.2777327  
C -2.3711331 0.5547435 -2.1831728  
C -2.9850395 1.7357902 -1.4573366  
O -1.9493328 2.5193417 -0.8613058  
C -2.4588930 3.6330792 -0.1449575  
C -2.6595338 -2.8859180 -1.5602031  
Si -0.6950180 -1.8459198 1.6564766  
C -0.0184468 -2.8644308 3.1151682  
O -0.3144786 -0.1761850 2.0258220  
C -0.6777516 0.5684543 3.1622468  
C 0.2658204 1.7459378 3.3070822  
O 0.2323297 2.5316150 2.1142019  
C 1.1168688 3.6393985 2.1712266

|    |            |            |            |
|----|------------|------------|------------|
| C  | -2.5880432 | -1.9498752 | 1.8474981  |
| Na | -0.0157671 | 1.0457949  | 0.0055890  |
| H  | -2.9781069 | 4.3312690  | -0.8137418 |
| H  | -1.6141902 | 4.1387919  | 0.3197739  |
| H  | -3.1536655 | 3.3159008  | 0.6419146  |
| H  | 2.1497802  | 3.3153951  | 2.3479028  |
| H  | 0.8256111  | 4.3388295  | 2.9649116  |
| H  | 1.0715182  | 4.1456647  | 1.2085306  |
| H  | 2.1128569  | 4.3481612  | -2.2206383 |
| H  | 0.4687627  | 4.1537854  | -1.5566017 |
| H  | 0.9201970  | 3.3174192  | -3.0555937 |
| H  | -0.6164856 | -0.0237635 | 4.0857289  |
| H  | -1.7099087 | 0.9356828  | 3.0749959  |
| H  | -0.0310174 | 2.3610861  | 4.1685070  |
| H  | 1.2884561  | 1.3831214  | 3.4741586  |
| H  | 2.2651691  | -2.7963080 | -2.4955889 |
| H  | 2.7323554  | -3.8927522 | -1.1981260 |
| H  | 3.7619791  | -2.5192264 | -1.5956336 |
| H  | 3.9075853  | -1.5906453 | 1.0834309  |
| H  | 2.9541762  | -2.9174349 | 1.7385053  |
| H  | 2.5350259  | -1.2464564 | 2.1424348  |
| H  | -3.2798829 | -2.8357666 | -0.6658863 |
| H  | -2.3932538 | -3.9344011 | -1.7203255 |
| H  | -3.2674578 | -2.5705316 | -2.4142898 |
| H  | -2.8744440 | -1.6606747 | 2.8634539  |
| H  | -2.9462205 | -2.9696575 | 1.6890259  |
| H  | -3.1109573 | -1.2923039 | 1.1508730  |
| H  | -3.1927001 | -0.0369515 | -2.6102139 |
| H  | -1.7580212 | 0.9178826  | -3.0198384 |

|   |            |            |            |
|---|------------|------------|------------|
| H | 3.8252253  | 0.0022764  | -1.5079366 |
| H | 3.4933458  | 0.9681850  | -0.0605284 |
| H | -3.5602736 | 2.3516854  | -2.1631181 |
| H | -3.6651641 | 1.3772490  | -0.6738158 |
| H | 1.0662937  | -2.8128432 | 3.2054194  |
| H | -0.2887117 | -3.9141945 | 2.9707527  |
| H | -0.4542710 | -2.5446280 | 4.0671630  |
| H | 3.5895668  | 2.3836052  | -2.0661645 |
| H | 2.3383768  | 1.3917077  | -2.8593891 |
| H | -1.0207223 | -1.6797954 | -3.9109301 |
| H | 0.0473074  | -2.9731181 | -3.3782134 |
| H | 0.5750772  | -1.2887821 | -3.2578948 |

[Na(MeOCH<sub>2</sub>CH<sub>2</sub>OSiMe<sub>2</sub>)<sub>3</sub>CH]<sup>+</sup> [Na-1-H]<sup>+</sup>

|    |            |            |            |
|----|------------|------------|------------|
| C  | -3.0234777 | 2.8958868  | 0.5904690  |
| Si | -1.5439070 | 1.8032548  | 1.0137335  |
| C  | -1.3498292 | 1.8416603  | 2.8905732  |
| C  | 0.0010428  | 2.2755984  | 0.0006349  |
| Si | -0.1017151 | 1.8039823  | -1.8436091 |
| C  | -1.8226425 | 1.8366401  | -2.6174635 |
| O  | -1.8442958 | 0.1905162  | 0.5336810  |
| C  | -2.9282890 | -0.6026557 | 1.0129435  |
| C  | -3.2362323 | -1.7029200 | 0.0209224  |
| O  | -2.0696937 | -2.5004785 | -0.1758056 |
| C  | -2.3017960 | -3.6145770 | -1.0357151 |
| O  | 0.4669553  | 0.1915668  | -1.8650896 |
| C  | 0.5919103  | -0.5971521 | -3.0468729 |
| C  | 1.6032854  | -1.7001632 | -2.8246910 |

|    |            |            |            |
|----|------------|------------|------------|
| O  | 1.1900039  | -2.5041419 | -1.7204583 |
| C  | 2.0479860  | -3.6226492 | -1.5021372 |
| C  | 1.0028754  | 2.9001396  | -2.9108349 |
| Si | 1.6498220  | 1.8021287  | 0.8329347  |
| C  | 2.0308282  | 2.9050569  | 2.3161362  |
| O  | 1.3778992  | 0.1935361  | 1.3436430  |
| C  | 2.3326086  | -0.5934026 | 2.0539570  |
| C  | 1.6250966  | -1.6964414 | 2.8099731  |
| O  | 0.8863275  | -2.4991366 | 1.8898183  |
| C  | 0.2419880  | -3.6063140 | 2.5182908  |
| C  | 3.1802596  | 1.8229763  | -0.2713084 |
| Na | 0.0065124  | -1.2832115 | -0.0009362 |
| H  | 2.0311599  | -4.3005214 | -2.3617472 |
| H  | 1.6825109  | -4.1448538 | -0.6201677 |
| H  | 3.0794111  | -3.2994460 | -1.3236836 |
| H  | -0.4382821 | -3.2698914 | 3.3082455  |
| H  | 0.9784823  | -4.2920580 | 2.9496538  |
| H  | -0.3324889 | -4.1247551 | 1.7529982  |
| H  | -3.0328315 | -4.3009291 | -0.5958779 |
| H  | -1.3515949 | -4.1290081 | -1.1641958 |
| H  | -2.6655329 | -3.2866791 | -2.0155501 |
| H  | 2.8911672  | 0.0095405  | 2.7783803  |
| H  | 3.0520819  | -1.0284166 | 1.3513251  |
| H  | 2.3707442  | -2.3083328 | 3.3335919  |
| H  | 0.9437606  | -1.2699923 | 3.5573519  |
| H  | -3.3187645 | 2.8384787  | -0.4566064 |
| H  | -2.7870242 | 3.9402107  | 0.8146693  |
| H  | -3.8910837 | 2.6330761  | 1.2014410  |
| H  | -2.2828348 | 1.5165610  | 3.3596799  |



|   |            |            |            |
|---|------------|------------|------------|
| H | -1.1543000 | 2.8558435  | 3.2470769  |
| H | -0.5492633 | 1.1919119  | 3.2440347  |
| H | 2.0540448  | 2.8617738  | -2.6277959 |
| H | 0.6730315  | 3.9401824  | -2.8345044 |
| H | 0.9261702  | 2.6233411  | -3.9655740 |
| H | 4.0486618  | 1.4958649  | 0.3078292  |
| H | 3.4000040  | 2.8330720  | -0.6247738 |
| H | 3.0857698  | 1.1675840  | -1.1370484 |
| H | 0.9298877  | 0.0050272  | -3.8976281 |
| H | -0.3789423 | -1.0327367 | -3.3071897 |
| H | -3.8360163 | -0.0036417 | 1.1468370  |
| H | -2.6678088 | -1.0410534 | 1.9826341  |
| H | 1.6707782  | -2.3118752 | -3.7335847 |
| H | 2.5939615  | -1.2742069 | -2.6213825 |
| H | 1.2651364  | 2.8731308  | 3.0905828  |
| H | 2.1287465  | 3.9430951  | 1.9854221  |
| H | 2.9851231  | 2.6301608  | 2.7732873  |
| H | -4.0552192 | -2.3198573 | 0.4129106  |
| H | -3.5560529 | -1.2737398 | -0.9368577 |
| H | -1.7564814 | 1.5183764  | -3.6616754 |
| H | -2.2371082 | 2.8474716  | -2.6210543 |
| H | -2.5258233 | 1.1779051  | -2.1075329 |
| H | 0.0009125  | 3.3760679  | 0.0009126  |

[K(MeOCH<sub>2</sub>CH<sub>2</sub>OSiMe<sub>2</sub>)<sub>3</sub>C] (K-1)

|    |           |           |            |
|----|-----------|-----------|------------|
| C  | 2.5896182 | 2.9978862 | 1.5716224  |
| Si | 1.7850869 | 1.8127430 | 0.3155921  |
| C  | 2.9423037 | 1.8658518 | -1.1989014 |

|    |            |            |            |
|----|------------|------------|------------|
| C  | 0.0092275  | 1.9802557  | -0.0063843 |
| Si | -1.1568494 | 1.8326282  | 1.3735737  |
| C  | -0.4210551 | 1.9117153  | 3.1307890  |
| O  | 2.0229041  | 0.2135849  | 0.9870155  |
| C  | 3.2566651  | -0.3882256 | 1.2912597  |
| C  | 3.0416203  | -1.6200665 | 2.1468541  |
| O  | 2.2622706  | -2.5858517 | 1.4355450  |
| C  | 2.0989681  | -3.7896042 | 2.1653958  |
| O  | -1.8571229 | 0.2319936  | 1.2674707  |
| C  | -2.7314632 | -0.3581985 | 2.1965785  |
| C  | -3.3817990 | -1.5873320 | 1.5943197  |
| O  | -2.3880581 | -2.5625182 | 1.2665767  |
| C  | -2.9554445 | -3.7585403 | 0.7598785  |
| C  | -2.6466988 | 3.0186987  | 1.4252897  |
| Si | -0.6029774 | 1.8176414  | -1.7046460 |
| C  | 0.1037976  | 2.9870551  | -3.0321649 |
| O  | -0.1700145 | 0.2082382  | -2.2401281 |
| C  | -0.5279828 | -0.3897369 | -3.4610337 |
| C  | 0.3176234  | -1.6226479 | -3.7069115 |
| O  | 0.0916097  | -2.5923264 | -2.6802947 |
| C  | 0.7943667  | -3.7999057 | -2.9175833 |
| C  | -2.4919892 | 1.9064573  | -1.9519253 |
| K  | -0.0071551 | -1.3617746 | 0.0057529  |
| H  | -3.6302195 | -4.2208993 | 1.4913642  |
| H  | -2.1380198 | -4.4494991 | 0.5527924  |
| H  | -3.5139219 | -3.5783637 | -0.1674699 |
| H  | 1.8792981  | -3.6367172 | -2.9434637 |
| H  | 0.4867030  | -4.2611906 | -3.8647120 |
| H  | 0.5585931  | -4.4843057 | -2.1024200 |

|   |            |            |            |
|---|------------|------------|------------|
| H | 3.0667801  | -4.2580349 | 2.3846478  |
| H | 1.5119755  | -4.4717670 | 1.5498934  |
| H | 1.5699868  | -3.6183788 | 3.1116356  |
| H | -0.3710640 | 0.2864513  | -4.3135205 |
| H | -1.5887949 | -0.6785783 | -3.4644210 |
| H | 0.0547535  | -2.0548874 | -4.6831267 |
| H | 1.3807458  | -1.3483074 | -3.7238662 |
| H | 2.1128793  | 2.9598182  | 2.5513636  |
| H | 2.5094120  | 4.0238205  | 1.2023940  |
| H | 3.6544744  | 2.7815425  | 1.7052171  |
| H | 3.9589461  | 1.5902568  | -0.9024000 |
| H | 2.9929973  | 2.8721842  | -1.6209878 |
| H | 2.6233651  | 1.1816454  | -1.9878155 |
| H | -3.2488805 | 2.9774179  | 0.5175982  |
| H | -2.2864132 | 4.0448270  | 1.5384738  |
| H | -3.3012007 | 2.8068238  | 2.2767619  |
| H | -2.7482485 | 1.6419929  | -2.9825837 |
| H | -2.8631625 | 2.9193319  | -1.7794383 |
| H | -3.0299400 | 1.2294825  | -1.2855473 |
| H | -3.5407153 | 0.3244015  | 2.4937964  |
| H | -2.1977959 | -0.6501198 | 3.1123211  |
| H | 3.9172950  | 0.2869144  | 1.8543029  |
| H | 3.7913586  | -0.6800155 | 0.3760453  |
| H | -4.0917062 | -2.0152882 | 2.3168460  |
| H | -3.9351504 | -1.3094991 | 0.6873662  |
| H | 1.1910370  | 2.9426301  | -3.0986705 |
| H | -0.1724114 | 4.0164003  | -2.7876425 |
| H | -0.3048438 | 2.7666581  | -4.0236817 |
| H | 4.0165330  | -2.0558748 | 2.4085478  |

H 2.5245509 -1.3438495 3.0754247  
H -1.1864224 1.6597298 3.8712637  
H -0.0686128 2.9187507 3.3650282  
H 0.4145462 1.2209086 3.2593326

[K(MeOCH<sub>2</sub>CH<sub>2</sub>OSiMe<sub>2</sub>)<sub>3</sub>CH]<sup>+</sup> [K-1-H]<sup>+</sup>

C -2.1917959 -3.0336190 -2.0758269  
Si -0.8086450 -1.8102760 -1.6795210  
C 0.3568422 -1.7885463 -3.1646464  
C 0.0019766 -2.2191558 -0.0019419  
Si -1.0509207 -1.8067955 1.5345378  
C -2.9196154 -1.8281496 1.2656321  
O -1.4546861 -0.2393792 -1.4903045  
C -2.1854050 0.4137489 -2.5289163  
C -3.0790337 1.4990384 -1.9705546  
O -2.2948444 2.5354239 -1.3815418  
C -3.0753789 3.6780948 -1.0362393  
O -0.5924935 -0.2214510 1.9754183  
C -1.1598903 0.4564285 3.0952197  
C -0.2248830 1.5236133 3.6215690  
O -0.0305913 2.5409940 2.6398798  
C 0.7024846 3.6542616 3.1471984  
C -0.6796230 -3.0001386 2.9506870  
Si 1.8593405 -1.8086884 0.1381426  
C 2.8972504 -3.0068361 -0.8887818  
O 2.0164120 -0.2256130 -0.4846447  
C 3.2727539 0.4503150 -0.5376500  
C 3.2736535 1.5246688 -1.6026648

|   |            |            |            |
|---|------------|------------|------------|
| O | 2.3276240  | 2.5427603  | -1.2812703 |
| C | 2.4297394  | 3.6733983  | -2.1444922 |
| C | 2.5642979  | -1.8231764 | 1.8898538  |
| K | -0.0077054 | 1.6648572  | -0.0189207 |
| H | 0.1718870  | 4.1259602  | 3.9808880  |
| H | 0.8026393  | 4.3762732  | 2.3377227  |
| H | 1.7003196  | 3.3526245  | 3.4846978  |
| H | 2.2407801  | 3.3958272  | -3.1874840 |
| H | 3.4209320  | 4.1335252  | -2.0718747 |
| H | 1.6802713  | 4.3968436  | -1.8262801 |
| H | -3.5472030 | 4.1134574  | -1.9233728 |
| H | -2.4023247 | 4.4135231  | -0.5974318 |
| H | -3.8528187 | 3.4228999  | -0.3076091 |
| H | 4.0868883  | -0.2439595 | -0.7744021 |
| H | 3.4944153  | 0.9040339  | 0.4352219  |
| H | 4.2815802  | 1.9572464  | -1.6530624 |
| H | 3.0375209  | 1.0906743  | -2.5828222 |
| H | -2.9885965 | -3.0393651 | -1.3322652 |
| H | -1.7809489 | -4.0454695 | -2.1350572 |
| H | -2.6409326 | -2.8196866 | -3.0491428 |
| H | -0.1948671 | -1.4851870 | -4.0589971 |
| H | 0.7602817  | -2.7835245 | -3.3657767 |
| H | 1.1912015  | -1.0994105 | -3.0303906 |
| H | 0.3589970  | -2.9662939 | 3.2785988  |
| H | -0.8999998 | -4.0253729 | 2.6392247  |
| H | -1.3134767 | -2.7933934 | 3.8169238  |
| H | 3.6181153  | -1.5317981 | 1.8630214  |
| H | 2.5254769  | -2.8243066 | 2.3251081  |
| H | 2.0400415  | -1.1374182 | 2.5562211  |

|   |            |            |            |
|---|------------|------------|------------|
| H | -1.3591475 | -0.2371548 | 3.9199935  |
| H | -2.1127742 | 0.9174784  | 2.8103770  |
| H | -2.8274776 | -0.2938333 | -3.0658464 |
| H | -1.4923820 | 0.8532856  | -3.2556534 |
| H | -0.6732565 | 1.9588996  | 4.5242058  |
| H | 0.7412136  | 1.0817724  | 3.8973970  |
| H | 2.6441633  | -2.9939323 | -1.9485564 |
| H | 2.7568268  | -4.0277393 | -0.5221759 |
| H | 3.9633127  | -2.7841499 | -0.7945416 |
| H | -3.6759681 | 1.9097210  | -2.7953659 |
| H | -3.7677679 | 1.0811710  | -1.2249395 |
| H | -3.4264156 | -1.5281160 | 2.1871961  |
| H | -3.2730328 | -2.8333302 | 1.0248567  |
| H | -3.2337071 | -1.1528074 | 0.4695668  |
| H | 0.0025411  | -3.3211980 | -0.0009462 |

[Li(MeOCH<sub>2</sub>CH<sub>2</sub>OSiMe<sub>2</sub>)<sub>3</sub>Si] (Li-2)

|   |            |           |            |
|---|------------|-----------|------------|
| C | -0.2337487 | 1.6121749 | 3.5250142  |
| H | -1.0814468 | 0.9260450 | 3.4701790  |
| H | -0.6092729 | 2.5792193 | 3.8690372  |
| H | 0.4579742  | 1.2361453 | 4.2855749  |
| C | 2.2188527  | 2.7978524 | 2.1831183  |
| H | 2.8130489  | 2.3900456 | 3.0065677  |
| H | 1.9336970  | 3.8156780 | 2.4624474  |
| H | 2.8592157  | 2.8721653 | 1.3017168  |
| C | 2.3972647  | 2.4031385 | -1.7765197 |
| H | 2.9543745  | 1.9796647 | -0.9383976 |
| H | 2.5134943  | 3.4893564 | -1.7400319 |

|   |            |            |            |
|---|------------|------------|------------|
| H | 2.8606680  | 2.0518510  | -2.7038921 |
| C | -0.1870108 | 2.4956455  | -3.3687062 |
| H | 0.3793113  | 2.1429000  | -4.2360476 |
| H | -0.1753023 | 3.5885488  | -3.3956588 |
| H | -1.2256091 | 2.1798430  | -3.4858861 |
| C | -3.4225067 | 1.1073520  | -1.5060022 |
| H | -2.8142431 | 0.7664559  | -2.3462704 |
| H | -3.8208531 | 2.0927223  | -1.7605734 |
| H | -4.2716232 | 0.4240554  | -1.4029386 |
| C | -3.6695836 | 1.5131969  | 1.4952772  |
| H | -4.5100372 | 0.8125047  | 1.4809734  |
| H | -4.0825271 | 2.5173551  | 1.3669324  |
| H | -3.2084129 | 1.4768875  | 2.4843864  |
| C | 2.1077286  | -0.5445331 | 2.1861190  |
| H | 1.5875491  | -1.2683178 | 2.8249028  |
| H | 2.6936643  | 0.1113590  | 2.8386883  |
| C | 3.0664245  | -1.2724058 | 1.2679129  |
| H | 3.6470384  | -0.5502355 | 0.6786084  |
| H | 3.7665953  | -1.8760659 | 1.8639767  |
| C | 1.0492763  | -0.5738960 | -2.8399122 |
| H | 2.0653454  | -0.9180865 | -2.6137796 |
| H | 1.0985636  | 0.0261499  | -3.7551276 |
| C | 0.1567695  | -1.7660047 | -3.1068710 |
| H | -0.8453073 | -1.4286553 | -3.4033959 |
| H | 0.5752800  | -2.3696986 | -3.9259928 |
| C | 3.1166826  | -2.8580754 | -0.4915521 |
| H | 3.7588897  | -2.2049341 | -1.0958180 |
| H | 2.4430158  | -3.4033272 | -1.1486910 |
| H | 3.7549493  | -3.5645037 | 0.0548540  |

|    |            |            |            |
|----|------------|------------|------------|
| C  | -0.7281978 | -3.6978497 | -2.0610496 |
| H  | -1.7443676 | -3.4420825 | -2.3870004 |
| H  | -0.7771296 | -4.1760039 | -1.0854231 |
| H  | -0.2921503 | -4.3903520 | -2.7927325 |
| C  | -0.0940308 | -3.7148054 | 2.0622980  |
| H  | -0.0331013 | -3.3011184 | 3.0767144  |
| H  | 0.9118480  | -3.8670183 | 1.6781342  |
| H  | -0.6247165 | -4.6744281 | 2.1087829  |
| C  | -2.6607197 | -1.5460654 | 0.5658763  |
| H  | -2.7934137 | -2.0945457 | -0.3747427 |
| H  | -3.6536754 | -1.2426419 | 0.9150566  |
| C  | -2.0525889 | -2.4609444 | 1.6074776  |
| H  | -1.9995776 | -1.9490551 | 2.5774646  |
| H  | -2.6747848 | -3.3604644 | 1.7230207  |
| Li | 0.1664040  | -0.9179840 | -0.0246362 |
| O  | 1.1649460  | 0.1817011  | 1.4153429  |
| O  | 0.5381216  | 0.1718682  | -1.7474567 |
| O  | -1.8093602 | -0.4324333 | 0.3587261  |
| O  | 2.3091308  | -2.1055892 | 0.3984498  |
| O  | 0.0728497  | -2.5377434 | -1.9152074 |
| O  | -0.7431528 | -2.8157528 | 1.1786638  |
| Si | -0.6593039 | 2.7807586  | 0.1258670  |
| Si | 0.6275572  | 1.8000254  | 1.8310631  |
| Si | 0.5499371  | 1.9268426  | -1.6999100 |
| Si | -2.3988538 | 1.1999280  | 0.1033130  |

[Li(MeOCH<sub>2</sub>CH<sub>2</sub>OSiMe<sub>2</sub>)<sub>3</sub>SiH]<sup>+</sup> [Li-**2**-H]<sup>+</sup>

|   |           |           |           |
|---|-----------|-----------|-----------|
| C | 1.8213095 | 2.4731613 | 3.0571727 |
|---|-----------|-----------|-----------|



|    |            |            |            |
|----|------------|------------|------------|
| Si | 1.7487364  | 1.6826084  | 1.3408020  |
| C  | 3.4702028  | 1.7325650  | 0.5638485  |
| Si | 0.0015453  | 2.5513344  | 0.0056475  |
| Si | -2.0309752 | 1.6879576  | 0.8488169  |
| C  | -2.2147624 | 1.7208916  | 2.7295775  |
| O  | 1.2353077  | 0.0469475  | 1.4693261  |
| C  | 1.8149973  | -0.8774771 | 2.3905796  |
| C  | 0.7385631  | -1.7970488 | 2.9193043  |
| O  | 0.0825991  | -2.4101744 | 1.8113415  |
| C  | -0.8232989 | -3.4381293 | 2.2103582  |
| O  | -1.8932254 | 0.0573915  | 0.3221686  |
| C  | -2.9807891 | -0.8665778 | 0.3726522  |
| C  | -2.9080528 | -1.7879016 | -0.8227796 |
| O  | -1.6235114 | -2.4077546 | -0.8398996 |
| C  | -1.5191702 | -3.4252578 | -1.8345883 |
| C  | -3.5521129 | 2.4937313  | 0.0666012  |
| Si | 0.2831967  | 1.6833421  | -2.1756100 |
| C  | 1.7202070  | 2.4903296  | -3.1025959 |
| O  | 0.6711719  | 0.0510786  | -1.7995818 |
| C  | 1.1871950  | -0.8626591 | -2.7680223 |
| C  | 2.1755148  | -1.7915794 | -2.1018237 |
| O  | 1.5303592  | -2.4232158 | -0.9976871 |
| C  | 2.3258133  | -3.4534200 | -0.4127716 |
| C  | -1.2564331 | 1.7192444  | -3.2704233 |
| Li | 0.0016053  | -1.1667624 | -0.0071144 |
| H  | -2.2318960 | -4.2331445 | -1.6385347 |
| H  | -0.5044344 | -3.8110436 | -1.7918577 |
| H  | -1.7132607 | -3.0193177 | -2.8335127 |
| H  | 3.2851969  | -3.0574623 | -0.0620610 |

|   |            |            |            |
|---|------------|------------|------------|
| H | 2.5181432  | -4.2522735 | -1.1364168 |
| H | 1.7674087  | -3.8479755 | 0.4315988  |
| H | -0.2911595 | -4.2447008 | 2.7253224  |
| H | -1.2887102 | -3.8220570 | 1.3068082  |
| H | -1.5958983 | -3.0433620 | 2.8795960  |
| H | 1.6993275  | -0.3425779 | -3.5840865 |
| H | 0.3630770  | -1.4378260 | -3.2009679 |
| H | 2.5150605  | -2.5430588 | -2.8258554 |
| H | 3.0508800  | -1.2328088 | -1.7480716 |
| H | 0.8798834  | 2.3741345  | 3.6003855  |
| H | 2.0298296  | 3.5412334  | 2.9502422  |
| H | 2.6210213  | 2.0522110  | 3.6722314  |
| H | 4.2065632  | 1.2604922  | 1.2205543  |
| H | 3.7926769  | 2.7643220  | 0.4026433  |
| H | 3.4913200  | 1.2165252  | -0.3970942 |
| H | -3.5488811 | 2.4166421  | -1.0220876 |
| H | -3.5660424 | 3.5567809  | 0.3220498  |
| H | -4.4851550 | 2.0638248  | 0.4403520  |
| H | -1.0573656 | 1.2506320  | -4.2386140 |
| H | -1.5665349 | 2.7489390  | -3.4661636 |
| H | -2.0932191 | 1.1959420  | -2.8053456 |
| H | -3.9491650 | -0.3557506 | 0.3560168  |
| H | -2.9223835 | -1.4462780 | 1.2989519  |
| H | 2.2808319  | -0.3669626 | 3.2396908  |
| H | 2.5896917  | -1.4592539 | 1.8818113  |
| H | -3.6970911 | -2.5472182 | -0.7475623 |
| H | -3.0589506 | -1.2247186 | -1.7521140 |
| H | 2.6656712  | 2.3982291  | -2.5647894 |
| H | 1.5134566  | 3.5570371  | -3.2248446 |

|   |            |            |            |
|---|------------|------------|------------|
| H | 1.8513789  | 2.0739848  | -4.1049351 |
| H | 1.1945279  | -2.5606111 | 3.5624741  |
| H | 0.0094977  | -1.2347420 | 3.5158122  |
| H | -3.1556420 | 1.2555982  | 3.0376043  |
| H | -2.2257626 | 2.7497834  | 3.0980552  |
| H | -1.3973373 | 1.1935804  | 3.2240985  |
| H | 0.0045238  | 4.0455693  | 0.0031252  |

[Na(MeOCH<sub>2</sub>CH<sub>2</sub>OSiMe<sub>2</sub>)<sub>3</sub>Si] (Na-2)

|    |            |            |            |
|----|------------|------------|------------|
| Na | -0.0011619 | -1.1119807 | -0.0061828 |
| Si | -0.0041744 | 2.8252784  | 0.0027447  |
| Si | -2.0004568 | 1.7587392  | 0.6427387  |
| Si | 1.5570954  | 1.7683392  | 1.4088576  |
| Si | 0.4399141  | 1.7665872  | -2.0504366 |
| O  | -2.0230739 | 0.0456935  | 0.2888345  |
| O  | 1.2858695  | 0.0494410  | 1.5856037  |
| O  | 0.7604353  | 0.0534666  | -1.9010336 |
| O  | -1.9681139 | -2.6064516 | -0.5810191 |
| O  | 0.4812874  | -2.5876915 | 1.9857317  |
| O  | 1.4695603  | -2.5979781 | -1.4162315 |
| C  | -2.4113142 | 1.8858114  | 2.5037844  |
| C  | -3.5145754 | 2.4809119  | -0.2704669 |
| C  | 1.5094895  | 2.4697143  | 3.1853146  |
| C  | 3.3734869  | 1.9300484  | 0.8408647  |
| C  | -0.9706915 | 1.8984004  | -3.3317188 |
| C  | 1.9856259  | 2.4943336  | -2.9049775 |
| C  | -3.1216161 | -0.8130827 | 0.5224891  |
| C  | -3.1895355 | -1.8683683 | -0.5624546 |

|   |            |            |            |
|---|------------|------------|------------|
| C | 2.0395276  | -0.8122384 | 2.4149201  |
| C | 1.1319101  | -1.8600432 | 3.0267036  |
| C | 1.1260130  | -0.7990487 | -2.9679249 |
| C | 2.0866787  | -1.8602384 | -2.4706983 |
| C | -1.9372020 | -3.5888127 | -1.6055749 |
| C | -0.4193257 | -3.5670020 | 2.4809114  |
| C | 2.3259332  | -3.5856109 | -0.8621493 |
| H | -3.3998061 | 1.4715944  | 2.7277778  |
| H | -2.4131620 | 2.9319417  | 2.8197924  |
| H | -1.6757878 | 1.3547569  | 3.1117159  |
| H | -3.4069743 | 2.4044003  | -1.3543845 |
| H | -3.6055980 | 3.5422856  | -0.0255184 |
| H | -4.4537008 | 1.9970478  | 0.0160353  |
| H | 0.5204038  | 2.3659211  | 3.6365845  |
| H | 1.7428230  | 3.5371367  | 3.1529130  |
| H | 2.2396091  | 1.9950105  | 3.8486011  |
| H | 4.0645320  | 1.5112772  | 1.5794293  |
| H | 3.6356164  | 2.9820184  | 0.7027060  |
| H | 3.5418439  | 1.4176340  | -0.1089425 |
| H | -0.6704670 | 1.4924901  | -4.3029265 |
| H | -1.2502779 | 2.9440636  | -3.4826693 |
| H | -1.8611700 | 1.3597496  | -3.0000195 |
| H | 2.8750400  | 2.4029343  | -2.2779038 |
| H | 1.8230089  | 3.5598220  | -3.0870098 |
| H | 2.1985756  | 2.0260146  | -3.8712853 |
| H | -4.0761045 | -0.2726132 | 0.5207451  |
| H | -3.0217666 | -1.3001922 | 1.5017502  |
| H | -4.0341043 | -2.5454220 | -0.3707048 |
| H | -3.3425267 | -1.3889256 | -1.5380424 |

|   |            |            |            |
|---|------------|------------|------------|
| H | 2.5276330  | -0.2744525 | 3.2368000  |
| H | 2.8288687  | -1.3052006 | 1.8315438  |
| H | 1.7226741  | -2.5455337 | 3.6511973  |
| H | 0.3777385  | -1.3748525 | 3.6598687  |
| H | 1.6230232  | -0.2549639 | -3.7804361 |
| H | 0.2347641  | -1.2806179 | -3.3916094 |
| H | 2.3543687  | -2.5362671 | -3.2952708 |
| H | 3.0036139  | -1.3860099 | -2.0974700 |
| H | -2.6995721 | -4.3596233 | -1.4370901 |
| H | -0.9477989 | -4.0418010 | -1.5905727 |
| H | -2.1048932 | -3.1380703 | -2.5913255 |
| H | 0.1122090  | -4.3478905 | 3.0390489  |
| H | -0.9223635 | -4.0077154 | 1.6221918  |
| H | -1.1717627 | -3.1157912 | 3.1394876  |
| H | 2.5730660  | -4.3551412 | -1.6040242 |
| H | 1.7988730  | -4.0389580 | -0.0249231 |
| H | 3.2579665  | -3.1401671 | -0.4936074 |

[Na(MeOCH<sub>2</sub>CH<sub>2</sub>OSiMe<sub>2</sub>)<sub>3</sub>SiH]<sup>+</sup> [Na-**2**-H]<sup>+</sup>

|    |            |            |           |
|----|------------|------------|-----------|
| C  | 1.5825339  | 2.5898558  | 3.1941192 |
| Si | 1.6827020  | 1.7769396  | 1.4903151 |
| C  | 3.4429100  | 1.9445176  | 0.8223576 |
| Si | 0.0003978  | 2.5473703  | 0.0042112 |
| Si | -2.1301011 | 1.7770578  | 0.7113896 |
| C  | -2.4294388 | 1.9138714  | 2.5726613 |
| O  | 1.2851218  | 0.1125714  | 1.6198529 |
| C  | 2.0029448  | -0.8070826 | 2.4452792 |
| C  | 1.0523465  | -1.8185223 | 3.0468724 |

O 0.3737220 -2.5079908 1.9994142  
C -0.4734966 -3.5490136 2.4829471  
O -2.0556658 0.1185887 0.2767680  
C -3.1312775 -0.7982462 0.4906377  
C -3.1756846 -1.8179623 -0.6257919  
O -1.9318815 -2.5132219 -0.6780875  
C -1.9189678 -3.5457097 -1.6628664  
C -3.5502620 2.6151381 -0.2120370  
Si 0.4509909 1.7775940 -2.1954118  
C 1.9552292 2.6222084 -2.9682313  
O 0.7993629 0.1206176 -1.9140020  
C 1.1752288 -0.7877958 -2.9518071  
C 2.1442742 -1.8186982 -2.4164553  
O 1.5346456 -2.5231124 -1.3373472  
C 2.3505278 -3.5817581 -0.8386304  
C -1.0178699 1.9085923 -3.3779961  
Na -0.0031938 -1.1891709 -0.0067992  
H -2.6500504 -4.3243273 -1.4216374  
H -0.9181730 -3.9721040 -1.6688897  
H -2.1442718 -3.1434969 -2.6569563  
H 3.3265431 -3.2058383 -0.5120449  
H 2.5047677 -4.3491978 -1.6043823  
H 1.8316477 -4.0143883 0.0139408  
H 0.1117163 -4.3310861 2.9779424  
H -0.9905456 -3.9684614 1.6225125  
H -1.2124900 -3.1579767 3.1914773  
H 1.6616247 -0.2691717 -3.7849933  
H 0.2807796 -1.2848135 -3.3422009  
H 2.4067504 -2.5148455 -3.2235133

|   |            |            |            |
|---|------------|------------|------------|
| H | 3.0639211  | -1.3313763 | -2.0683576 |
| H | 0.6029251  | 2.4598005  | 3.6574825  |
| H | 1.7665013  | 3.6634414  | 3.1005499  |
| H | 2.3386609  | 2.1923532  | 3.8767160  |
| H | 4.1727651  | 1.5550842  | 1.5378263  |
| H | 3.6902540  | 2.9946650  | 0.6470273  |
| H | 3.5691251  | 1.4058347  | -0.1183856 |
| H | -3.4587896 | 2.5062567  | -1.2939399 |
| H | -3.5581668 | 3.6843051  | 0.0157280  |
| H | -4.5217471 | 2.2151143  | 0.0911728  |
| H | -0.7567503 | 1.5287905  | -4.3697900 |
| H | -1.3224881 | 2.9511838  | -3.4998470 |
| H | -1.8789429 | 1.3449246  | -3.0143915 |
| H | -4.0989870 | -0.2857708 | 0.5181907  |
| H | -2.9922256 | -1.3041932 | 1.4521419  |
| H | 2.5173852  | -0.2969935 | 3.2666885  |
| H | 2.7605526  | -1.3199344 | 1.8429390  |
| H | -3.9961117 | -2.5220764 | -0.4357609 |
| H | -3.3630907 | -1.3212778 | -1.5863865 |
| H | 2.8508387  | 2.5074401  | -2.3554326 |
| H | 1.7614694  | 3.6926642  | -3.0766015 |
| H | 2.1717919  | 2.2324273  | -3.9666550 |
| H | 1.6248193  | -2.5276061 | 3.6590196  |
| H | 0.3216852  | -1.3161185 | 3.6935872  |
| H | -3.4155982 | 1.5239788  | 2.8408450  |
| H | -2.3969150 | 2.9588846  | 2.8908791  |
| H | -1.6798892 | 1.3629407  | 3.1434839  |
| H | 0.0001146  | 4.0440244  | 0.0032249  |

[K(MeOCH<sub>2</sub>CH<sub>2</sub>OSiMe<sub>2</sub>)<sub>3</sub>Si] (K-2)

|    |            |            |            |
|----|------------|------------|------------|
| C  | 1.7457347  | 2.7964673  | 3.1125845  |
| Si | 1.7026038  | 1.9806623  | 1.3868349  |
| C  | 3.4546096  | 2.1913244  | 0.6541531  |
| Si | 0.0289839  | 2.9265519  | 0.0356035  |
| Si | -2.0024788 | 2.0216524  | 0.7935656  |
| C  | -2.2481659 | 2.2102600  | 2.6790895  |
| O  | 1.5435046  | 0.2701307  | 1.7069144  |
| C  | 2.4898740  | -0.4951517 | 2.4242160  |
| C  | 1.8147466  | -1.6386865 | 3.1534473  |
| O  | 1.2048809  | -2.5301515 | 2.2182152  |
| C  | 0.5821076  | -3.6357551 | 2.8518078  |
| O  | -2.2433674 | 0.3215799  | 0.4680311  |
| C  | -3.3699371 | -0.4143352 | 0.8986195  |
| C  | -3.6644370 | -1.5522504 | -0.0563807 |
| O  | -2.5716112 | -2.4720730 | -0.0821763 |
| C  | -2.8211849 | -3.5852200 | -0.9241224 |
| C  | -3.4925428 | 2.8899076  | -0.0263433 |
| Si | 0.3640345  | 2.0287401  | -2.1096455 |
| C  | 1.8311528  | 2.8760684  | -2.9904342 |
| O  | 0.7340118  | 0.3215780  | -2.1681349 |
| C  | 0.8957252  | -0.4091620 | -3.3663273 |
| C  | 1.8300171  | -1.5832512 | -3.1584715 |
| O  | 1.2767792  | -2.4935665 | -2.2055277 |
| C  | 2.0888587  | -3.6407919 | -2.0174937 |
| C  | -1.1451092 | 2.2512265  | -3.2601794 |
| K  | -0.0106977 | -1.1444369 | -0.0062832 |
| H  | -3.6885712 | -4.1603050 | -0.5761034 |



H -1.9391120 -4.2244477 -0.8952874  
H -2.9997272 -3.2729923 -1.9606552  
H 3.0890198 -3.3698966 -1.6570568  
H 2.1933106 -4.2110824 -2.9489869  
H 1.6033291 -4.2698203 -1.2714529  
H 1.3112980 -4.2371456 3.4091987  
H 0.1368567 -4.2541412 2.0724968  
H -0.2063799 -3.3109802 3.5418023  
H 1.3261334 0.2065195 -4.1675762  
H -0.0736824 -0.7802403 -3.7253318  
H 1.9778699 -2.1000754 -4.1178397  
H 2.8049918 -1.2257610 -2.8026164  
H 0.7889288 2.6911981 3.6284325  
H 1.9459161 3.8654520 3.0051223  
H 2.5269416 2.3764183 3.7541523  
H 4.2298709 1.8642686 1.3542638  
H 3.6424746 3.2424548 0.4218701  
H 3.5698043 1.6207209 -0.2703312  
H -3.4576669 2.8007461 -1.1142898  
H -3.4718511 3.9551108 0.2165874  
H -4.4523899 2.4915915 0.3178715  
H -0.9179764 1.9487617 -4.2872822  
H -1.4495962 3.3002488 -3.2844651  
H -1.9999146 1.6646989 -2.9149874  
H -4.2733368 0.2080064 0.9469863  
H -3.2015425 -0.8231486 1.9043859  
H 3.0143591 0.1038983 3.1800508  
H 3.2516457 -0.9009145 1.7443226  
H -4.5755472 -2.0734181 0.2718639

|   |            |            |            |
|---|------------|------------|------------|
| H | -3.8361280 | -1.1560290 | -1.0657670 |
| H | 2.7575647  | 2.7634715  | -2.4230068 |
| H | 1.6302461  | 3.9463568  | -3.0815144 |
| H | 1.9992983  | 2.4844408  | -3.9989749 |
| H | 2.5644424  | -2.1828838 | 3.7460409  |
| H | 1.0513871  | -1.2445517 | 3.8372019  |
| H | -3.2511892 | 1.9022120  | 2.9903168  |
| H | -2.1172295 | 3.2549039  | 2.9714406  |
| H | -1.5219408 | 1.6150362  | 3.2375560  |

[K(MeOCH<sub>2</sub>CH<sub>2</sub>OSiMe<sub>2</sub>)<sub>3</sub>SiH]<sup>+</sup> [K-2-H]<sup>+</sup>

|    |            |            |            |
|----|------------|------------|------------|
| C  | 3.0493185  | 2.7460328  | 1.7913396  |
| Si | 2.2699892  | 1.7809809  | 0.3645641  |
| C  | 3.3441419  | 1.9644440  | -1.1812061 |
| Si | 0.0099417  | 2.4264661  | -0.0008078 |
| Si | -1.4376496 | 1.7872518  | 1.7755081  |
| C  | -0.6250616 | 1.9406566  | 3.4764030  |
| O  | 2.1680874  | 0.1228746  | 0.7824006  |
| C  | 3.3238415  | -0.6844002 | 1.0176147  |
| C  | 3.0450685  | -1.7504567 | 2.0540446  |
| O  | 2.0367993  | -2.6429528 | 1.5830995  |
| C  | 1.8567196  | -3.7648809 | 2.4441126  |
| O  | -1.7769169 | 0.1372127  | 1.4639251  |
| C  | -2.5899718 | -0.6567808 | 2.3315176  |
| C  | -3.3150003 | -1.7386089 | 1.5621981  |
| O  | -2.3774080 | -2.6419364 | 0.9805175  |
| C  | -3.0080685 | -3.7656714 | 0.3709418  |
| C  | -3.0467543 | 2.7792044  | 1.7547422  |

|    |            |            |            |
|----|------------|------------|------------|
| Si | -0.8104229 | 1.7740497  | -2.1354540 |
| C  | 0.0373039  | 2.7252805  | -3.5321577 |
| O  | -0.4084906 | 0.1126815  | -2.2483643 |
| C  | -0.7914005 | -0.6949536 | -3.3639339 |
| C  | 0.2350398  | -1.7717163 | -3.6369860 |
| O  | 0.3194975  | -2.6653241 | -2.5288221 |
| C  | 1.1427557  | -3.7958634 | -2.8039863 |
| C  | -2.6857207 | 1.9679974  | -2.2881484 |
| K  | 0.0026504  | -1.5148434 | 0.0160228  |
| H  | -3.5694628 | -4.3484495 | 1.1090328  |
| H  | -2.2235359 | -4.3918509 | -0.0521939 |
| H  | -3.6889693 | -3.4542172 | -0.4291143 |
| H  | 2.1665950  | -3.4916072 | -3.0492226 |
| H  | 0.7380676  | -4.3832002 | -3.6352457 |
| H  | 1.1599183  | -4.4143018 | -1.9077467 |
| H  | 2.7737289  | -4.3599183 | 2.5104059  |
| H  | 1.0644318  | -4.3799727 | 2.0192271  |
| H  | 1.5633934  | -3.4490476 | 3.4514576  |
| H  | -0.8883195 | -0.0954568 | -4.2763886 |
| H  | -1.7642236 | -1.1585509 | -3.1655678 |
| H  | -0.0710611 | -2.3216129 | -4.5371937 |
| H  | 1.2170987  | -1.3203837 | -3.8283829 |
| H  | 2.4962460  | 2.6154049  | 2.7230648  |
| H  | 3.0622046  | 3.8135315  | 1.5567120  |
| H  | 4.0850713  | 2.4408488  | 1.9644149  |
| H  | 4.3784549  | 1.6729984  | -0.9788250 |
| H  | 3.3597223  | 3.0047918  | -1.5157902 |
| H  | 2.9730773  | 1.3509499  | -2.0045520 |
| H  | -3.5841450 | 2.6667789  | 0.8116312  |

|   |            |            |            |
|---|------------|------------|------------|
| H | -2.8303268 | 3.8417086  | 1.8923143  |
| H | -3.7148078 | 2.4777128  | 2.5660682  |
| H | -3.0341468 | 1.6673263  | -3.2800994 |
| H | -2.9751976 | 3.0121674  | -2.1451879 |
| H | -3.2144643 | 1.3669390  | -1.5456563 |
| H | -3.3495217 | -0.0471343 | 2.8341036  |
| H | -1.9642972 | -1.1150796 | 3.1053659  |
| H | 4.1635520  | -0.0826109 | 1.3844248  |
| H | 3.6378458  | -1.1577132 | 0.0808514  |
| H | -3.9707733 | -2.2787034 | 2.2582910  |
| H | -3.9406433 | -1.2929321 | 0.7780771  |
| H | 1.1205492  | 2.5929759  | -3.5171668 |
| H | -0.1708976 | 3.7940299  | -3.4358138 |
| H | -0.3302951 | 2.4119802  | -4.5132580 |
| H | 3.9756083  | -2.3034620 | 2.2405103  |
| H | 2.7247311  | -1.2890324 | 2.9970017  |
| H | -1.3160412 | 1.6458552  | 4.2712293  |
| H | -0.3317073 | 2.9755698  | 3.6703236  |
| H | 0.2674199  | 1.3166607  | 3.5529166  |
| H | 0.0116765  | 3.9261285  | -0.0043645 |

[Li(MeOCH<sub>2</sub>CH<sub>2</sub>OSiMe<sub>2</sub>)<sub>3</sub>Ge] (Li-3)

|    |            |           |            |
|----|------------|-----------|------------|
| C  | 3.2586258  | 2.1932548 | 1.3962541  |
| Si | 2.0638961  | 1.5253312 | 0.0619158  |
| C  | 3.0847571  | 1.5039083 | -1.5523606 |
| Ge | 0.0067531  | 2.7991324 | -0.0022651 |
| Si | -1.0871197 | 1.5426905 | 1.7534421  |
| C  | -0.2022147 | 1.5248268 | 3.4462457  |

|    |            |            |            |
|----|------------|------------|------------|
| O  | 1.7977817  | -0.1627963 | 0.4614097  |
| C  | 2.8424580  | -1.0525628 | 0.8190755  |
| C  | 2.3598605  | -1.9966095 | 1.8991818  |
| O  | 1.1996719  | -2.6686369 | 1.4227988  |
| C  | 0.6852439  | -3.6108145 | 2.3487288  |
| O  | -1.3089406 | -0.1459837 | 1.3293365  |
| C  | -2.1396906 | -1.0325907 | 2.0600014  |
| C  | -2.8234887 | -1.9886105 | 1.1070396  |
| O  | -1.8240252 | -2.6563204 | 0.3452571  |
| C  | -2.3600002 | -3.6133900 | -0.5526826 |
| C  | -2.8367187 | 2.2226236  | 2.1155484  |
| Si | -0.9757876 | 1.5402965  | -1.8211167 |
| C  | -0.4069957 | 2.2070491  | -3.5198917 |
| O  | -0.5098713 | -0.1513146 | -1.7931436 |
| C  | -0.7182906 | -1.0380947 | -2.8797417 |
| C  | 0.4577643  | -1.9836508 | -2.9985066 |
| O  | 0.6170888  | -2.6602247 | -1.7571085 |
| C  | 1.6664968  | -3.6131586 | -1.7743754 |
| C  | -2.8842032 | 1.5368928  | -1.9044842 |
| Li | -0.0099401 | -1.0796409 | -0.0003387 |
| H  | -2.8654342 | -4.4228474 | -0.0104928 |
| H  | -1.5264679 | -4.0162890 | -1.1233576 |
| H  | -3.0800702 | -3.1540990 | -1.2418625 |
| H  | 2.6232585  | -3.1485174 | -2.0438151 |
| H  | 1.4565587  | -4.4177378 | -2.4908246 |
| H  | 1.7392993  | -4.0242631 | -0.7701031 |
| H  | 1.4055884  | -4.4187620 | 2.5304427  |
| H  | -0.2244912 | -4.0192024 | 1.9148040  |
| H  | 0.4449062  | -3.1366587 | 3.3087094  |

H -0.8200564 -0.5019041 -3.8293320  
H -1.6385822 -1.6130991 -2.7225245  
H 0.2734480 -2.7062048 -3.8067418  
H 1.3720533 -1.4239709 -3.2366208  
H 2.8362964 2.1198265 2.4008187  
H 3.4328694 3.2539426 1.1957999  
H 4.2348008 1.6986298 1.3939501  
H 4.0359538 0.9781988 -1.4209968  
H 3.3124482 2.5255300 -1.8680013  
H 2.5376161 1.0188767 -2.3631063  
H -3.4903221 2.1589861 1.2429513  
H -2.7431522 3.2809233 2.3737192  
H -3.3320826 1.7265666 2.9559492  
H -3.2462373 1.0159195 -2.7968473  
H -3.2612071 2.5623089 -1.9453214  
H -3.3226624 1.0560736 -1.0279731  
H -2.9149240 -0.4972134 2.6186355  
H -1.5402192 -1.5982114 2.7831473  
H 3.7191534 -0.5186962 1.2015025  
H 3.1611328 -1.6283244 -0.0579795  
H -3.4208226 -2.7166925 1.6751997  
H -3.4958147 -1.4383248 0.4357348  
H 0.6744292 2.1285693 -3.6511980  
H -0.6632321 3.2687225 -3.5711815  
H -0.8950083 1.7154850 -4.3673192  
H 3.1504370 -2.7222640 2.1392589  
H 2.1158846 -1.4361382 2.8114636  
H -0.7983400 1.0087006 4.2056134  
H -0.0362083 2.5474774 3.7950198

H 0.7699105 1.0320321 3.3838352

[Li(MeOCH<sub>2</sub>CH<sub>2</sub>OSiMe<sub>2</sub>)<sub>3</sub>GeH]<sup>+</sup> [Li-**3**-H]<sup>+</sup>

C -2.6678060 -2.1926094 -2.4001666  
Si -0.9897077 -1.4205118 -1.9985104  
C 0.1052478 -1.4727870 -3.5371181  
Ge 0.0012097 -2.3203618 -0.0006957  
Si -1.2344398 -1.4318925 1.8612221  
C -3.1139127 -1.5064566 1.6859282  
O -1.2032303 0.2143339 -1.5088783  
C -1.9703379 1.1470209 -2.2719754  
C -2.7124874 2.0736740 -1.3366338  
O -1.7684567 2.6863785 -0.4606346  
C -2.3495492 3.7136935 0.3400290  
O -0.7196638 0.2066968 1.7950583  
C -0.9900154 1.1403581 2.8413572  
C 0.1930380 2.0664804 3.0071315  
O 0.4757312 2.6725019 1.7470803  
C 1.4510874 3.7093733 1.8434209  
C -0.7298315 -2.1948424 3.5153449  
Si 2.2329467 -1.4384008 0.1435542  
C 3.4168968 -2.2010153 -1.1174861  
O 1.9152609 0.1989181 -0.2714812  
C 2.9545398 1.1355215 -0.5589718  
C 2.5095524 2.0556597 -1.6728918  
O 1.2737653 2.6609135 -1.2971313  
C 0.8727396 3.6923965 -2.1975563  
C 3.0205741 -1.5093516 1.8591828

|    |            |            |            |
|----|------------|------------|------------|
| Li | -0.0056245 | 1.4157165  | 0.0016479  |
| H  | 1.0893228  | 4.5232163  | 2.4804886  |
| H  | 1.6239476  | 4.0792412  | 0.8365689  |
| H  | 2.3905809  | 3.3281463  | 2.2584077  |
| H  | 0.7679656  | 3.3056030  | -3.2173269 |
| H  | 1.6048017  | 4.5069513  | -2.2043247 |
| H  | -0.0874395 | 4.0635277  | -1.8504515 |
| H  | -2.7280713 | 4.5271165  | -0.2879514 |
| H  | -1.5678273 | 4.0885353  | 0.9952753  |
| H  | -3.1752952 | 3.3222612  | 0.9448142  |
| H  | 3.8761889  | 0.6356743  | -0.8747545 |
| H  | 3.1781447  | 1.7161677  | 0.3411835  |
| H  | 3.2756422  | 2.8240960  | -1.8364534 |
| H  | 2.3780459  | 1.4959108  | -2.6074392 |
| H  | -3.3733926 | -2.0984419 | -1.5729335 |
| H  | -2.5352165 | -3.2589975 | -2.6014698 |
| H  | -3.1220112 | -1.7530237 | -3.2921012 |
| H  | -0.3924581 | -0.9980091 | -4.3875204 |
| H  | 0.3193579  | -2.5065285 | -3.8203434 |
| H  | 1.0564108  | -0.9637825 | -3.3729476 |
| H  | 0.3370567  | -2.0801575 | 3.7148153  |
| H  | -0.9491869 | -3.2658157 | 3.5003977  |
| H  | -1.2854597 | -1.7669804 | 4.3540156  |
| H  | 4.0080771  | -1.0391183 | 1.8549253  |
| H  | 3.1544895  | -2.5463527 | 2.1776963  |
| H  | 2.4068376  | -1.0030699 | 2.6059540  |
| H  | -1.1697310 | 0.6382608  | 3.7975987  |
| H  | -1.8854664 | 1.7165855  | 2.5899336  |
| H  | -2.7044830 | 0.6428862  | -2.9089779 |



|   |            |            |            |
|---|------------|------------|------------|
| H | -1.3020104 | 1.7226527  | -2.9190565 |
| H | -0.0482600 | 2.8340854  | 3.7531269  |
| H | 1.0727952  | 1.5111618  | 3.3557104  |
| H | 3.0607966  | -2.0846252 | -2.1425417 |
| H | 3.5114338  | -3.2723747 | -0.9210334 |
| H | 4.4211342  | -1.7741771 | -1.0509865 |
| H | -3.2393159 | 2.8368331  | -1.9237464 |
| H | -3.4543152 | 1.5169987  | -0.7505254 |
| H | -3.6061424 | -1.0370967 | 2.5426444  |
| H | -3.4534383 | -2.5445835 | 1.6438487  |
| H | -3.4546614 | -1.0027841 | 0.7800667  |
| H | -0.0073474 | -3.8641339 | -0.0063682 |

[Na(MeOCH<sub>2</sub>CH<sub>2</sub>OSiMe<sub>2</sub>)<sub>3</sub>Ge] (Na-3)

|    |            |            |            |
|----|------------|------------|------------|
| C  | 3.1961143  | 2.3302007  | 1.5778812  |
| Si | 2.1187202  | 1.5939872  | 0.1816708  |
| C  | 3.2024716  | 1.6593554  | -1.3904110 |
| Ge | 0.0040869  | 2.7583262  | -0.0038525 |
| Si | -1.2187419 | 1.6079409  | 1.7397049  |
| C  | -0.3978993 | 1.6865183  | 3.4630912  |
| O  | 1.9652753  | -0.1064152 | 0.5621003  |
| C  | 3.0439748  | -0.9742229 | 0.8511672  |
| C  | 2.6126306  | -2.0080156 | 1.8713522  |
| O  | 1.4998912  | -2.7416798 | 1.3611447  |
| C  | 1.0198420  | -3.7153838 | 2.2759418  |
| O  | -1.4725091 | -0.0947778 | 1.4302674  |
| C  | -2.2532603 | -0.9594390 | 2.2316434  |
| C  | -2.9312827 | -1.9968350 | 1.3599171  |

|    |            |            |            |
|----|------------|------------|------------|
| O  | -1.9417988 | -2.7288038 | 0.6373132  |
| C  | -2.5034041 | -3.7133883 | -0.2175015 |
| C  | -2.9673495 | 2.3447720  | 1.9665618  |
| Si | -0.8976516 | 1.6072677  | -1.9329008 |
| C  | -0.2208350 | 2.3459035  | -3.5601714 |
| O  | -0.4959092 | -0.0935787 | -1.9937916 |
| C  | -0.7780839 | -0.9552709 | -3.0789162 |
| C  | 0.3206100  | -1.9900410 | -3.2122235 |
| O  | 0.4215191  | -2.7330454 | -1.9974665 |
| C  | 1.4479901  | -3.7132452 | -2.0394025 |
| C  | -2.8008114 | 1.6802064  | -2.0891181 |
| Na | -0.0088847 | -1.2514085 | -0.0040577 |
| H  | -3.0183000 | -4.4908692 | 0.3604986  |
| H  | -1.6851609 | -4.1568194 | -0.7820567 |
| H  | -3.2179422 | -3.2671389 | -0.9203547 |
| H  | 2.4198708  | -3.2594078 | -2.2688926 |
| H  | 1.2310720  | -4.4793846 | -2.7940174 |
| H  | 1.4987584  | -4.1722880 | -1.0539923 |
| H  | 1.7780173  | -4.4850214 | 2.4668406  |
| H  | 0.1377034  | -4.1714198 | 1.8311182  |
| H  | 0.7370274  | -3.2562571 | 3.2311659  |
| H  | -0.8408866 | -0.4129809 | -4.0302173 |
| H  | -1.7404714 | -1.4608442 | -2.9235855 |
| H  | 0.0943200  | -2.6674913 | -4.0478048 |
| H  | 1.2774048  | -1.4921675 | -3.4165221 |
| H  | 2.7077386  | 2.2466910  | 2.5514651  |
| H  | 3.3511910  | 3.3944030  | 1.3810822  |
| H  | 4.1837991  | 1.8631580  | 1.6470206  |
| H  | 4.1894572  | 1.2170672  | -1.2207867 |

|   |            |            |            |
|---|------------|------------|------------|
| H | 3.3537115  | 2.6964252  | -1.7012238 |
| H | 2.7300102  | 1.1291539  | -2.2201691 |
| H | -3.5621117 | 2.2563195  | 1.0547768  |
| H | -2.8770292 | 3.4096067  | 2.1965911  |
| H | -3.5238532 | 1.8792122  | 2.7863328  |
| H | -3.1469069 | 1.2408674  | -3.0304526 |
| H | -3.1412202 | 2.7186798  | -2.0646616 |
| H | -3.2880553 | 1.1511846  | -1.2671711 |
| H | -3.0371829 | -0.4198440 | 2.7766701  |
| H | -1.6215973 | -1.4621232 | 2.9760052  |
| H | 3.9056103  | -0.4369688 | 1.2662362  |
| H | 3.3811656  | -1.4801153 | -0.0630632 |
| H | -3.5205857 | -2.6811091 | 1.9870940  |
| H | -3.6091248 | -1.5025675 | 0.6520332  |
| H | 0.8668347  | 2.2625434  | -3.6179300 |
| H | -0.4688500 | 3.4100301  | -3.5954555 |
| H | -0.6497785 | 1.8811085  | -4.4536814 |
| H | 3.4469468  | -2.6917052 | 2.0842014  |
| H | 2.3238577  | -1.5095627 | 2.8056313  |
| H | -1.0372062 | 1.2501248  | 4.2374728  |
| H | -0.2036607 | 2.7253921  | 3.7419106  |
| H | 0.5563874  | 1.1554693  | 3.4703583  |

[Na(MeOCH<sub>2</sub>CH<sub>2</sub>OSiMe<sub>2</sub>)<sub>3</sub>GeH]<sup>+</sup> [Na-3-H]<sup>+</sup>

|    |            |            |            |
|----|------------|------------|------------|
| C  | 3.1618686  | -2.3508250 | 1.7072016  |
| Si | 1.4609774  | -1.5289633 | 1.7463720  |
| C  | 0.7299321  | -1.6676220 | 3.4830815  |
| Ge | -0.0003658 | -2.3194310 | -0.0033348 |

|    |            |            |            |
|----|------------|------------|------------|
| Si | 0.7777916  | -1.5267895 | -2.1455840 |
| C  | 2.6497290  | -1.6377032 | -2.3798839 |
| O  | 1.6076262  | 0.1289759  | 1.3281894  |
| C  | 2.4142071  | 1.0555929  | 2.0589259  |
| C  | 3.0274562  | 2.0681405  | 1.1171381  |
| O  | 1.9896173  | 2.7496815  | 0.4162807  |
| C  | 2.4843177  | 3.7941818  | -0.4200780 |
| O  | 0.3195468  | 0.1254542  | -2.0705775 |
| C  | 0.5436503  | 1.0500247  | -3.1377249 |
| C  | -0.5692727 | 2.0734952  | -3.1826111 |
| O  | -0.6284468 | 2.7618392  | -1.9353175 |
| C  | -1.5996176 | 3.8073001  | -1.9289489 |
| C  | -0.0951729 | -2.3683799 | -3.5944614 |
| Si | -2.2430544 | -1.5208818 | 0.3925829  |
| C  | -3.0701131 | -2.3690173 | 1.8643927  |
| O  | -1.9460086 | 0.1283797  | 0.7633590  |
| C  | -2.9810847 | 1.0465685  | 1.1239200  |
| C  | -2.4498798 | 2.0736747  | 2.0991918  |
| O  | -1.3559847 | 2.7670214  | 1.5035608  |
| C  | -0.8628538 | 3.8268647  | 2.3210816  |
| C  | -3.3764721 | -1.6216040 | -1.1158603 |
| Na | -0.0026302 | 1.4188363  | -0.0045066 |
| H  | -1.3381785 | 4.5869583  | -2.6519779 |
| H  | -1.6133408 | 4.2273519  | -0.9255995 |
| H  | -2.5958669 | 3.4198223  | -2.1699012 |
| H  | -0.5548985 | 3.4548497  | 3.3046046  |
| H  | -1.6253010 | 4.6008899  | 2.4580461  |
| H  | 0.0014026  | 4.2494770  | 1.8134813  |
| H  | 2.9618157  | 4.5788210  | 0.1762416  |

|   |            |            |            |
|---|------------|------------|------------|
| H | 1.6324183  | 4.2081778  | -0.9553142 |
| H | 3.2108958  | 3.4078163  | -1.1437704 |
| H | -3.8249579 | 0.5351693  | 1.5993940  |
| H | -3.3548683 | 1.5463306  | 0.2239388  |
| H | -3.2541078 | 2.7776654  | 2.3492036  |
| H | -2.1194321 | 1.5845898  | 3.0244803  |
| H | 3.6549596  | -2.2297729 | 0.7411322  |
| H | 3.0554462  | -3.4225634 | 1.8947426  |
| H | 3.8230593  | -1.9524792 | 2.4817032  |
| H | 1.4162082  | -1.2612853 | 4.2316399  |
| H | 0.5490895  | -2.7137543 | 3.7426907  |
| H | -0.2167376 | -1.1305949 | 3.5631479  |
| H | -1.1801564 | -2.2674813 | -3.5337557 |
| H | 0.1402342  | -3.4359297 | -3.5951636 |
| H | 0.2333233  | -1.9658526 | -4.5566768 |
| H | -4.3678797 | -1.2186321 | -0.8898582 |
| H | -3.5112160 | -2.6611065 | -1.4253585 |
| H | -2.9687939 | -1.0665044 | -1.9625796 |
| H | 0.5755030  | 0.5443895  | -4.1089674 |
| H | 1.5056754  | 1.5520619  | -2.9887302 |
| H | 3.2293783  | 0.5513754  | 2.5889523  |
| H | 1.7955737  | 1.5666487  | 2.8044712  |
| H | -0.3708481 | 2.7817618  | -3.9973814 |
| H | -1.5302399 | 1.5814876  | -3.3800995 |
| H | -2.4871084 | -2.2622037 | 2.7808308  |
| H | -3.1744862 | -3.4377580 | 1.6596341  |
| H | -4.0742088 | -1.9772915 | 2.0491427  |
| H | 3.6241016  | 2.7823874  | 1.6995566  |
| H | 3.6913912  | 1.5680111  | 0.4005547  |

H 2.9496540 -1.2312371 -3.3501935  
H 2.9795317 -2.6790977 -2.3480070  
H 3.1849406 -1.0897048 -1.6022563  
H -0.0051048 -3.8662526 -0.0026728

[K(MeOCH<sub>2</sub>CH<sub>2</sub>OSiMe<sub>2</sub>)<sub>3</sub>Ge] (K-3)

C 3.0230111 2.5127848 1.8790692  
Si 2.1598780 1.6564346 0.4056268  
C 3.3526401 1.8281223 -1.0781993  
Ge 0.0007773 2.6643154 -0.0020034  
Si -1.4309029 1.6606811 1.6673514  
C -0.7488452 1.8721259 3.4400824  
O 2.1721257 -0.0443224 0.8059491  
C 3.3531736 -0.7923831 1.0149346  
C 3.0948510 -1.9559852 1.9493830  
O 2.1476353 -2.8554136 1.3699610  
C 1.9211673 -3.9979297 2.1788838  
O -1.7536711 -0.0476668 1.4995286  
C -2.5084640 -0.8062560 2.4228158  
C -3.2124474 -1.9532743 1.7269833  
O -2.2553751 -2.8506926 1.1617486  
C -2.8645104 -3.9592660 0.5201249  
C -3.1519678 2.4892760 1.6585651  
Si -0.7304937 1.6569506 -2.0729826  
C 0.1555328 2.4625789 -3.5612636  
O -0.4418135 -0.0557984 -2.2567469  
C -0.8731361 -0.8161214 -3.3671267  
C 0.0808608 -1.9609062 -3.6375829

O 0.1123096 -2.8520946 -2.5216340  
C 0.9576079 -3.9683371 -2.7449288  
C -2.6027428 1.8886634 -2.3798806  
K 0.0063116 -1.4744836 0.0099064  
H -3.4504279 -4.5570182 1.2296387  
H -2.0684590 -4.5799456 0.1091466  
H -3.5227459 -3.6382961 -0.2965799  
H 1.9918141 -3.6565091 -2.9371480  
H 0.6075839 -4.5677139 -3.5948327  
H 0.9360131 -4.5838328 -1.8459709  
H 2.8428467 -4.5772207 2.3161624  
H 1.1850918 -4.6205341 1.6706476  
H 1.5305208 -3.7202030 3.1657832  
H -0.9229372 -0.2140130 -4.2839607  
H -1.8788246 -1.2200055 -3.1874772  
H -0.2520857 -2.5052183 -4.5334005  
H 1.0893047 -1.5692057 -3.8245977  
H 2.4404476 2.4075230 2.7971910  
H 3.1185090 3.5816909 1.6722937  
H 4.0285421 2.1217800 2.0658139  
H 4.3692460 1.5131336 -0.8222436  
H 3.4011793 2.8705414 -1.4024960  
H 3.0162868 1.2315489 -1.9297851  
H -3.6491107 2.3655199 0.6938973  
H -3.0391317 3.5621337 1.8341520  
H -3.8132911 2.0946447 2.4365997  
H -2.8974713 1.5656049 -3.3832817  
H -2.8680789 2.9440643 -2.2804286  
H -3.1961977 1.3278804 -1.6539308

|   |            |            |            |
|---|------------|------------|------------|
| H | -3.2833324 | -0.2025254 | 2.9130010  |
| H | -1.8594718 | -1.2073693 | 3.2132503  |
| H | 4.1474168  | -0.1852600 | 1.4695307  |
| H | 3.7400719  | -1.1762387 | 0.0614221  |
| H | -3.8363996 | -2.4905754 | 2.4560065  |
| H | -3.8636464 | -1.5629835 | 0.9338769  |
| H | 1.2383377  | 2.3357875  | -3.4944373 |
| H | -0.0492026 | 3.5360551  | -3.5722759 |
| H | -0.1773326 | 2.0532826  | -4.5206043 |
| H | 4.0406744  | -2.4864007 | 2.1330241  |
| H | 2.7121373  | -1.5865175 | 2.9095497  |
| H | -1.4685195 | 1.5474205  | 4.1984761  |
| H | -0.5203777 | 2.9238312  | 3.6305569  |
| H | 0.1730797  | 1.3025567  | 3.5799329  |

[K(MeOCH<sub>2</sub>CH<sub>2</sub>OSiMe<sub>2</sub>)<sub>3</sub>GeH]<sup>+</sup> [K-**3**-H]<sup>+</sup>

|    |            |            |            |
|----|------------|------------|------------|
| C  | 1.9790045  | 2.5752216  | 2.9624143  |
| Si | 1.8976409  | 1.5951007  | 1.3488119  |
| C  | 3.5411138  | 1.7441591  | 0.4260746  |
| Ge | 0.0000934  | 2.2458153  | -0.0029012 |
| Si | -2.1062056 | 1.5760544  | 0.9806749  |
| C  | -2.1110670 | 1.7383782  | 2.8645987  |
| O  | 1.5941859  | -0.0548013 | 1.6931981  |
| C  | 2.4993667  | -0.8638974 | 2.4483240  |
| C  | 1.7595607  | -1.9387793 | 3.2128002  |
| O  | 1.1148034  | -2.8322198 | 2.3072602  |
| C  | 0.5237544  | -3.9471883 | 2.9705190  |
| O  | -2.2367442 | -0.0781603 | 0.5586255  |



C -3.3182331 -0.9063360 0.9916774  
C -3.6478799 -1.9578452 -0.0445044  
O -2.5393828 -2.8367597 -0.2245322  
C -2.8488451 -3.9333621 -1.0809039  
C -3.5637881 2.5350545 0.2546813  
Si 0.2232574 1.5815819 -2.3188335  
C 1.5897890 2.5485789 -3.1952817  
O 0.6590528 -0.0724453 -2.2305263  
C 0.8398549 -0.8852747 -3.3926976  
C 1.8742037 -1.9625173 -3.1517110  
O 1.4315563 -2.8484120 -2.1251669  
C 2.2833043 -3.9816299 -1.9760983  
C -1.3951832 1.7485802 -3.2810818  
K 0.0152551 -1.6796712 -0.0042820  
H -3.6561025 -4.5435360 -0.6616288  
H -1.9513866 -4.5440132 -1.1689219  
H -3.1459416 -3.5870992 -2.0771912  
H 3.3027594 -3.6808079 -1.7095288  
H 2.3160421 -4.5720850 -2.8978332  
H 1.8726622 -4.5960550 -1.1758577  
H 1.2823929 -4.5403128 3.4922160  
H 0.0507045 -4.5676540 2.2103769  
H -0.2343784 -3.6242801 3.6928856  
H 1.1806234 -0.2890170 -4.2471020  
H -0.1134426 -1.3491609 -3.6685367  
H 2.0187473 -2.5188802 -4.0876110  
H 2.8342397 -1.5118689 -2.8687156  
H 1.0710856 2.4556088 3.5556654  
H 2.0997781 3.6396267 2.7455306

|   |            |            |            |
|---|------------|------------|------------|
| H | 2.8312504  | 2.2715509  | 3.5766169  |
| H | 4.3785264  | 1.4366394  | 1.0589927  |
| H | 3.7214220  | 2.7808140  | 0.1306107  |
| H | 3.5519268  | 1.1288824  | -0.4757154 |
| H | -3.6340862 | 2.4124686  | -0.8275733 |
| H | -3.4485875 | 3.6016824  | 0.4639415  |
| H | -4.5133491 | 2.2195412  | 0.6961642  |
| H | -1.2682297 | 1.4433996  | -4.3234765 |
| H | -1.7311536 | 2.7885914  | -3.2855601 |
| H | -2.1882912 | 1.1401589  | -2.8419762 |
| H | -4.2271262 | -0.3189007 | 1.1651208  |
| H | -3.0521070 | -1.3941927 | 1.9360851  |
| H | 3.0546791  | -0.2647203 | 3.1787754  |
| H | 3.2281264  | -1.3287310 | 1.7748858  |
| H | -4.5218302 | -2.5254159 | 0.3029954  |
| H | -3.9056683 | -1.4815892 | -0.9992795 |
| H | 2.5578563  | 2.4164876  | -2.7085698 |
| H | 1.3548442  | 3.6159418  | -3.1886633 |
| H | 1.6894294  | 2.2450925  | -4.2411464 |
| H | 2.4841807  | -2.4895985 | 3.8272294  |
| H | 1.0172089  | -1.4847535 | 3.8822304  |
| H | -3.0713292 | 1.4278664  | 3.2859098  |
| H | -1.9478250 | 2.7782492  | 3.1588201  |
| H | -1.3266306 | 1.1317103  | 3.3215643  |
| H | -0.0067436 | 3.7970777  | -0.0077105 |

[(MeOCH<sub>2</sub>CH<sub>2</sub>OSiMe<sub>2</sub>)<sub>3</sub>CH] (1-A)

|    |            |            |            |
|----|------------|------------|------------|
| C  | 0.2122341  | 3.3292480  | 2.3880367  |
| Si | -0.3940611 | 2.1060616  | 1.0695136  |
| O  | 0.7397753  | 2.0281479  | -0.1792761 |
| C  | 1.0141696  | 3.1153568  | -1.0561565 |
| C  | 2.3277641  | 2.9212911  | -1.7974775 |
| O  | 2.3039200  | 1.8990581  | -2.7756805 |
| C  | 2.6659733  | 0.6054824  | -2.3024448 |
| C  | -2.0173434 | 2.8065544  | 0.3973275  |
| C  | -0.5104324 | 0.3601046  | 1.8226213  |
| Si | -1.9559233 | -0.7067701 | 1.1895349  |
| C  | -1.7962766 | -2.5617578 | 1.5224355  |
| Si | 1.1488632  | -0.5528601 | 2.0277336  |
| C  | 1.1130738  | -1.5860663 | 3.6193145  |
| C  | 2.6742552  | 0.5591858  | 2.1475716  |
| O  | 1.3114048  | -1.5828337 | 0.7000407  |
| C  | 2.4864529  | -2.3413676 | 0.4368210  |
| C  | 2.2231977  | -3.4567144 | -0.5630776 |
| O  | 1.9965670  | -3.0167070 | -1.8886329 |
| C  | 0.6360970  | -2.7374276 | -2.2054453 |
| C  | -3.5690635 | -0.1481240 | 2.0184228  |
| O  | -2.0673486 | -0.4451878 | -0.4748156 |
| C  | -2.9564543 | -1.1625607 | -1.3235290 |
| C  | -3.1480766 | -0.4607362 | -2.6591811 |
| O  | -2.0202567 | -0.5023107 | -3.5127679 |
| C  | -1.1036101 | 0.5760828  | -3.3527225 |
| H  | 0.0105179  | -3.6263397 | -2.0481977 |
| H  | 0.6056245  | -2.4744843 | -3.2615433 |

H 0.2383531 -1.9110207 -1.6144217  
H -0.6441464 0.5812533 -2.3630570  
H -1.6036852 1.5392157 -3.5221078  
H -0.3311771 0.4485453 -4.1094835  
H 3.6772013 0.6178595 -1.8735096  
H 2.6637825 -0.0586730 -3.1651938  
H 1.9647618 0.2310305 -1.5549021  
H -3.9484487 -1.2639268 -0.8594961  
H -2.5680475 -2.1708536 -1.5087948  
H -3.9529967 -0.9810497 -3.1885960  
H -3.4700735 0.5757273 -2.4893418  
H 1.1844278 3.0526217 2.7983367  
H -0.5004562 3.3844970 3.2161896  
H 0.2996765 4.3369567 1.9727488  
H -1.8387987 3.7898107 -0.0474366  
H -2.7489815 2.9457538 1.1969510  
H -2.4526195 2.1582301 -0.3626388  
H 0.3040876 -2.3180614 3.6246607  
H 0.9883492 -0.9388003 4.4923547  
H 2.0534072 -2.1278549 3.7536678  
H -2.6506954 -3.0896292 1.0896353  
H -1.7984598 -2.7719745 2.5946830  
H -0.8829564 -2.9703716 1.0910811  
H 2.8693052 -2.8068304 1.3568346  
H 3.2732536 -1.6904110 0.0383003  
H 1.0856399 4.0617534 -0.5001042  
H 0.2077794 3.2185015 -1.7912321  
H 3.1205662 -4.0834248 -0.5965320  
H 1.3892310 -4.0794549 -0.2114396

|   |            |            |            |
|---|------------|------------|------------|
| H | -3.7953913 | 0.9014428  | 1.8259764  |
| H | -3.5107975 | -0.2885689 | 3.1018212  |
| H | -4.4152099 | -0.7429566 | 1.6637550  |
| H | 2.5423651  | 3.8531299  | -2.3311698 |
| H | 3.1381844  | 2.7511519  | -1.0759008 |
| H | 3.5755661  | -0.0558806 | 2.2213954  |
| H | 2.6380226  | 1.1817102  | 3.0451212  |
| H | 2.7698184  | 1.2097384  | 1.2787086  |
| H | -0.8018814 | 0.5664879  | 2.8647113  |

[(MeOCH<sub>2</sub>CH<sub>2</sub>OSiMe<sub>2</sub>)<sub>3</sub>CH] (**1-B**)

|    |            |            |            |
|----|------------|------------|------------|
| C  | -0.6160180 | 0.7761917  | -0.8162385 |
| Si | -2.2484204 | -0.1678922 | -1.0234892 |
| Si | -0.0854548 | 0.9850491  | 1.0042499  |
| Si | 0.7836767  | 0.2155769  | -1.9722035 |
| C  | -0.1781249 | -0.6163845 | 1.9992094  |
| C  | -1.0865230 | 2.3542495  | 1.8380791  |
| C  | -3.2038527 | 0.4217624  | -2.5477878 |
| C  | -2.0456113 | -2.0465314 | -1.0720904 |
| C  | 2.0806125  | 1.5639792  | -2.2267822 |
| C  | 0.1982171  | -0.2777193 | -3.7109928 |
| O  | -3.1705825 | 0.2290338  | 0.3424336  |
| C  | -4.4781735 | -0.2652295 | 0.5916087  |
| O  | 1.4377106  | -1.1477202 | -1.2226984 |
| C  | 2.5734394  | -1.8585854 | -1.6870674 |
| O  | 1.5309909  | 1.4946207  | 0.9585047  |
| C  | 2.3072190  | 1.7550782  | 2.1161513  |
| C  | -5.0011355 | 0.3735332  | 1.8672598  |

O -6.3026162 -0.1327959 2.1014566  
C -6.8963890 0.3856748 3.2750388  
C 2.7989862 -3.0471345 -0.7685394  
O 3.9318958 -3.7543455 -1.2398524  
C 4.2405388 -4.8895089 -0.4566521  
C 3.6623694 2.2839533 1.6772827  
O 4.4279690 2.5410596 2.8405306  
C 5.7195895 3.0379666 2.5534569  
H 0.2262356 -0.4709248 3.0043526  
H 0.3983967 -1.4029599 1.5088789  
H -1.2116080 -0.9516055 2.1030817  
H -0.7937557 2.4812940 2.8838979  
H -0.9339045 3.3103608 1.3299170  
H -2.1493094 2.1137037 1.8060660  
H -4.1774125 -0.0716569 -2.6114222  
H -3.3796826 1.4997333 -2.5026804  
H -2.6676943 0.2057138 -3.4734182  
H -3.0205639 -2.5363338 -1.1427628  
H -1.5467555 -2.4109753 -0.1724695  
H -1.4519185 -2.3677260 -1.9294392  
H 2.8930956 1.2096791 -2.8671721  
H 2.4920007 1.8908644 -1.2734141  
H 1.6304072 2.4291561 -2.7224124  
H 1.0609263 -0.5645933 -4.3191220  
H -0.4995454 -1.1165735 -3.7150402  
H -0.2814948 0.5653344 -4.2151171  
H -4.4730696 -1.3543905 0.7142192  
H -5.1595861 -0.0229942 -0.2320056  
H 2.4276809 -2.2223250 -2.7112603

|   |            |            |            |
|---|------------|------------|------------|
| H | 3.4673260  | -1.2245397 | -1.6792701 |
| H | 2.4549053  | 0.8442210  | 2.7079140  |
| H | 1.8274644  | 2.5005434  | 2.7616643  |
| H | -5.0207671 | 1.4666485  | 1.7535673  |
| H | -4.3309129 | 0.1333584  | 2.7044075  |
| H | -7.8856750 | -0.0624620 | 3.3622170  |
| H | -7.0025651 | 1.4776278  | 3.2248944  |
| H | -6.3101135 | 0.1330907  | 4.1687519  |
| H | 2.9578592  | -2.6934940 | 0.2597586  |
| H | 1.9073804  | -3.6897765 | -0.7707923 |
| H | 5.1189297  | -5.3589630 | -0.8982335 |
| H | 4.4676246  | -4.6136097 | 0.5819705  |
| H | 3.4140147  | -5.6131314 | -0.4518411 |
| H | 3.5281330  | 3.2016594  | 1.0870660  |
| H | 4.1602575  | 1.5411188  | 1.0380874  |
| H | 6.2221775  | 3.2040761  | 3.5058097  |
| H | 6.3051268  | 2.3215217  | 1.9615109  |
| H | 5.6734786  | 3.9881052  | 2.0040938  |
| H | -0.8499991 | 1.7988428  | -1.1471244 |

$[(\text{MeOCH}_2\text{CH}_2\text{OSiMe}_2)_3\text{C}]^- (\mathbf{1}^- \text{-A})$

|    |           |           |            |
|----|-----------|-----------|------------|
| C  | 2.4747882 | 2.8445139 | 1.3552195  |
| Si | 1.9416991 | 1.7493069 | -0.1302123 |
| O  | 3.1796276 | 2.0068667 | -1.3116193 |
| C  | 3.7130373 | 3.2622886 | -1.6493475 |
| C  | 4.6999268 | 3.1500010 | -2.8040285 |
| O  | 4.1162458 | 2.9356843 | -4.0827077 |
| C  | 3.7115452 | 1.5940926 | -4.3326835 |

|    |            |            |            |
|----|------------|------------|------------|
| C  | 0.3990044  | 2.6359425  | -0.8296545 |
| C  | 1.7449529  | -0.0153263 | 0.2083492  |
| Si | 0.1617225  | -0.8230479 | -0.1201599 |
| C  | 0.1227730  | -2.7115812 | 0.1717993  |
| Si | 3.1659651  | -0.9945265 | 0.7466855  |
| C  | 2.9780466  | -1.9109571 | 2.4245822  |
| C  | 4.8095399  | -0.0348306 | 0.9251914  |
| O  | 3.5024236  | -2.2544464 | -0.3909632 |
| C  | 4.4083230  | -3.3062986 | -0.1746664 |
| C  | 4.5633616  | -4.1657174 | -1.4224644 |
| O  | 5.3274615  | -3.5819931 | -2.4701548 |
| C  | 4.6258564  | -2.6199505 | -3.2500052 |
| C  | -1.3488868 | -0.1670949 | 0.8692053  |
| O  | -0.2961623 | -0.6152127 | -1.7765417 |
| C  | -1.5633670 | -0.9231409 | -2.2998392 |
| C  | -1.5988579 | -0.7245756 | -3.8094243 |
| O  | -0.9272106 | -1.7219246 | -4.5682462 |
| C  | 0.4892398  | -1.5844866 | -4.6057220 |
| H  | 3.7278363  | -3.0632867 | -3.7023206 |
| H  | 5.3059930  | -2.3106837 | -4.0456539 |
| H  | 4.3210331  | -1.7551851 | -2.6589167 |
| H  | 0.9386170  | -1.6899880 | -3.6173523 |
| H  | 0.7764885  | -0.6050801 | -5.0128280 |
| H  | 0.8581062  | -2.3659691 | -5.2723912 |
| H  | 4.5610699  | 0.9044578  | -4.2311503 |
| H  | 3.3547981  | 1.5655467  | -5.3637092 |
| H  | 2.9226417  | 1.2694857  | -3.6526759 |
| H  | -2.3421966 | -0.2727189 | -1.8679173 |
| H  | -1.8547884 | -1.9628455 | -2.0853563 |



|   |            |            |            |
|---|------------|------------|------------|
| H | -2.6425212 | -0.7651993 | -4.1384692 |
| H | -1.1984545 | 0.2708130  | -4.0496058 |
| H | 3.4300520  | 2.5225872  | 1.7767921  |
| H | 1.7231669  | 2.7635257  | 2.1458861  |
| H | 2.5636821  | 3.9034682  | 1.0883539  |
| H | 0.6664173  | 3.6317742  | -1.1971908 |
| H | -0.3690688 | 2.7692915  | -0.0631930 |
| H | -0.0349622 | 2.0688970  | -1.6549470 |
| H | 2.1335449  | -2.6042337 | 2.4191176  |
| H | 2.7929152  | -1.1747628 | 3.2119059  |
| H | 3.8757792  | -2.4753994 | 2.7002939  |
| H | -0.7921408 | -3.1426082 | -0.2468835 |
| H | 0.1383208  | -2.9517863 | 1.2381098  |
| H | 0.9792014  | -3.1958138 | -0.3006066 |
| H | 4.0632871  | -3.9696297 | 0.6361375  |
| H | 5.4051824  | -2.9375317 | 0.1119392  |
| H | 4.2571353  | 3.7066770  | -0.7991124 |
| H | 2.9281852  | 3.9773681  | -1.9393617 |
| H | 5.1005012  | -5.0795121 | -1.1472718 |
| H | 3.5663008  | -4.4479103 | -1.7899482 |
| H | -1.5316294 | 0.8935977  | 0.6813743  |
| H | -1.1512552 | -0.2823986 | 1.9387471  |
| H | -2.2706824 | -0.7136570 | 0.6410476  |
| H | 5.2400581  | 4.0988947  | -2.8888928 |
| H | 5.4264350  | 2.3562601  | -2.5792524 |
| H | 5.6448160  | -0.7290135 | 1.0614124  |
| H | 4.7928243  | 0.6266701  | 1.7955112  |
| H | 5.0046275  | 0.5720262  | 0.0395003  |

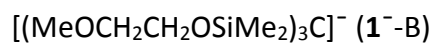

|    |            |            |            |
|----|------------|------------|------------|
| C  | -0.6072186 | 0.3128240  | -0.7557144 |
| Si | -2.3655746 | 0.3142979  | -1.1373876 |
| Si | -0.1215652 | 0.9672475  | 0.8676368  |
| Si | 0.6951692  | -0.3830185 | -1.7904281 |
| C  | -0.1783532 | -0.2939774 | 2.3027660  |
| C  | -1.0903867 | 2.4996532  | 1.4830153  |
| C  | -3.0810529 | 1.9458345  | -1.8550380 |
| C  | -3.0461953 | -1.0452302 | -2.2998674 |
| C  | 1.9934810  | 0.8655153  | -2.4394498 |
| C  | 0.1535102  | -1.3296891 | -3.3667056 |
| O  | -3.2394072 | 0.0904542  | 0.3413059  |
| C  | -4.6194434 | 0.2941986  | 0.4922198  |
| O  | 1.6034136  | -1.5494224 | -0.8911533 |
| C  | 2.8600142  | -2.0455464 | -1.2666619 |
| O  | 1.5202393  | 1.4964817  | 0.7956233  |
| C  | 2.2962664  | 1.7954020  | 1.9251111  |
| C  | -5.0341048 | -0.2940327 | 1.8319456  |
| O  | -6.4326068 | -0.0911172 | 2.0197067  |
| C  | -6.8955527 | -0.6022069 | 3.2464193  |
| C  | 3.1946762  | -3.2072417 | -0.3444190 |
| O  | 4.4762566  | -3.7298765 | -0.6896165 |
| C  | 4.8589226  | -4.8095059 | 0.1269215  |
| C  | 3.6116725  | 2.3882625  | 1.4447312  |
| O  | 4.4222488  | 2.7056357  | 2.5738905  |
| C  | 5.6700356  | 3.2449723  | 2.2108385  |
| H  | 0.1265305  | 0.1206697  | 3.2701711  |
| H  | 0.4632581  | -1.1466874 | 2.0662383  |

|   |            |            |            |
|---|------------|------------|------------|
| H | -1.2028185 | -0.6635420 | 2.3946531  |
| H | -0.7177485 | 2.8445675  | 2.4533758  |
| H | -0.9970531 | 3.3236911  | 0.7705933  |
| H | -2.1505951 | 2.2629472  | 1.5958608  |
| H | -4.1647568 | 1.9134619  | -2.0151830 |
| H | -2.8563123 | 2.7880729  | -1.1952891 |
| H | -2.6077074 | 2.1547556  | -2.8195048 |
| H | -4.1410718 | -1.0185353 | -2.3060660 |
| H | -2.7330901 | -2.0369222 | -1.9664124 |
| H | -2.7110111 | -0.9135293 | -3.3307508 |
| H | 2.8145389  | 0.3892631  | -2.9871834 |
| H | 2.4047754  | 1.4375094  | -1.6063909 |
| H | 1.5038902  | 1.5703199  | -3.1187357 |
| H | 1.0391502  | -1.7140926 | -3.8838036 |
| H | -0.4948511 | -2.1762978 | -3.1352664 |
| H | -0.3748795 | -0.6792615 | -4.0693152 |
| H | -5.2044958 | -0.1936045 | -0.3007432 |
| H | -4.8794804 | 1.3618776  | 0.4765471  |
| H | 2.8773847  | -2.4074163 | -2.3057721 |
| H | 3.6457026  | -1.2824742 | -1.1756690 |
| H | 2.5083921  | 0.9001685  | 2.5253824  |
| H | 1.8052519  | 2.5229118  | 2.5883119  |
| H | -4.4656725 | 0.1911788  | 2.6369720  |
| H | -4.7969834 | -1.3665839 | 1.8507375  |
| H | -7.9666026 | -0.4013037 | 3.3044094  |
| H | -6.3986086 | -0.1220776 | 4.1022629  |
| H | -6.7345023 | -1.6878557 | 3.3234086  |
| H | 3.1919349  | -2.8587910 | 0.6970247  |
| H | 2.4259327  | -3.9864991 | -0.4420337 |

|   |           |            |            |
|---|-----------|------------|------------|
| H | 5.8452325 | -5.1402171 | -0.2029629 |
| H | 4.9191572 | -4.5193046 | 1.1862978  |
| H | 4.1575163 | -5.6533837 | 0.0443230  |
| H | 3.4127991 | 3.2913367  | 0.8512034  |
| H | 4.1250764 | 1.6649283  | 0.7970209  |
| H | 6.2192129 | 3.4546043  | 3.1302940  |
| H | 6.2564994 | 2.5425566  | 1.6005469  |
| H | 5.5610599 | 4.1811444  | 1.6430543  |

$[(\text{MeOCH}_2\text{CH}_2\text{OSiMe}_2)_3\text{Si}]^- (\mathbf{2}^- \text{-A})$

|    |           |            |            |
|----|-----------|------------|------------|
| C  | 2.2970855 | 2.4651264  | 2.9358272  |
| Si | 2.0084997 | 1.6066614  | 1.2405265  |
| O  | 3.5956968 | 1.5143800  | 0.5446404  |
| C  | 4.3259156 | 2.6434208  | 0.1315843  |
| C  | 5.8199390 | 2.4028313  | 0.2316666  |
| O  | 6.2567020 | 1.5191041  | -0.7912361 |
| C  | 7.6186739 | 1.1880834  | -0.6775575 |
| C  | 1.0432147 | 2.8803623  | 0.1845952  |
| Si | 0.8351317 | -0.4098328 | 1.4780043  |
| Si | 0.2291686 | -0.9544876 | -0.7498827 |
| C  | 0.3032838 | -2.8366779 | -1.1022652 |
| Si | 2.4508870 | -2.0034314 | 2.1223084  |
| C  | 1.6179610 | -3.6475995 | 2.6224057  |
| C  | 3.4276357 | -1.4204671 | 3.6708012  |
| O  | 3.6490570 | -2.6224571 | 1.0485509  |
| C  | 4.6743792 | -1.8450431 | 0.4784391  |
| C  | 5.4935908 | -2.6802933 | -0.4833273 |
| O  | 4.7629236 | -2.9544904 | -1.6712250 |

C 5.4329289 -3.8409233 -2.5307505  
C -1.5697870 -0.4211542 -1.1036880  
O 1.0034903 -0.1877831 -2.0772118  
C 2.3959505 -0.2064826 -2.3135015  
C 2.7142666 0.4626297 -3.6324725  
O 2.5307417 1.8718728 -3.5458224  
C 2.7374246 2.5203672 -4.7736252  
H 6.4030086 -3.4386063 -2.8636750  
H 4.7990849 -3.9922746 -3.4054503  
H 5.6131605 -4.8155486 -2.0527206  
H 2.0327588 2.1727107 -5.5447627  
H 3.7605526 2.3682832 -5.1533036  
H 2.5802145 3.5881186 -4.6130635  
H 8.2641871 2.0778502 -0.7495059  
H 7.8614659 0.5120012 -1.4980293  
H 7.8386200 0.6824878 0.2739925  
H 2.7812256 -1.2333406 -2.3671982  
H 2.9408603 0.3032737 -1.5117247  
H 3.7607039 0.2448059 -3.8992105  
H 2.0631941 0.0521724 -4.4188798  
H 2.8531082 1.8132121 3.6141387  
H 1.3351148 2.6879610 3.4053879  
H 2.8498621 3.4064886 2.8382867  
H 1.5210150 3.8660869 0.1886510  
H 0.0314573 2.9981287 0.5828024  
H 0.9629298 2.5420172 -0.8508896  
H 1.0763288 -4.0826079 1.7794679  
H 0.9023134 -3.4810744 3.4314976  
H 2.3673645 -4.3725962 2.9551420

|   |            |            |            |
|---|------------|------------|------------|
| H | -0.0801928 | -3.0527247 | -2.1053633 |
| H | -0.3051926 | -3.3868739 | -0.3785141 |
| H | 1.3255427  | -3.2155989 | -1.0317138 |
| H | 5.3696769  | -1.4822770 | 1.2530424  |
| H | 4.2849940  | -0.9586015 | -0.0317046 |
| H | 4.1069769  | 3.5237850  | 0.7558805  |
| H | 4.0789847  | 2.9071403  | -0.9056068 |
| H | 6.4178289  | -2.1353566 | -0.7375153 |
| H | 5.7739097  | -3.6245034 | 0.0072083  |
| H | -1.6898280 | 0.6547928  | -0.9545907 |
| H | -2.2599561 | -0.9306626 | -0.4259069 |
| H | -1.8475572 | -0.6570831 | -2.1359046 |
| H | 6.3493024  | 3.3661504  | 0.1338912  |
| H | 6.0532652  | 1.9826786  | 1.2203740  |
| H | 4.0838420  | -2.2193466 | 4.0328374  |
| H | 2.7397923  | -1.1484923 | 4.4758434  |
| H | 4.0440264  | -0.5444779 | 3.4540154  |

$[(\text{MeOCH}_2\text{CH}_2\text{OSiMe}_2)_3\text{Si}]^- (\mathbf{2}^- \text{-B})$

|    |            |            |            |
|----|------------|------------|------------|
| Si | -0.6116660 | 1.6187414  | -1.4519933 |
| Si | -2.4332814 | 0.1085805  | -1.3356280 |
| Si | 0.0957634  | 1.5124945  | 0.8021488  |
| Si | 1.0109043  | 0.2131923  | -2.4245616 |
| C  | 0.1689383  | -0.1438259 | 1.7625535  |
| C  | -0.9546980 | 2.6771200  | 1.9019305  |
| C  | -3.5878474 | 0.3048234  | -2.8565504 |
| C  | -2.1877389 | -1.7873805 | -1.1698619 |
| C  | 2.6994950  | 1.1044618  | -2.5699440 |

|   |            |            |            |
|---|------------|------------|------------|
| C | 0.5609453  | -0.2996118 | -4.2225905 |
| O | -3.3803305 | 0.5591704  | 0.0370318  |
| C | -4.6791430 | 0.0826185  | 0.2935387  |
| O | 1.3400054  | -1.2689445 | -1.5968209 |
| C | 2.2527857  | -2.2422826 | -2.0418535 |
| O | 1.7083917  | 2.1326047  | 0.8376243  |
| C | 2.4127432  | 2.4229578  | 2.0177937  |
| C | -4.9124933 | 0.1283646  | 1.7951105  |
| O | -6.2363431 | -0.3186231 | 2.0750792  |
| C | -6.5187504 | -0.3462557 | 3.4540757  |
| C | 2.2483606  | -3.3834011 | -1.0368795 |
| O | 3.1546087  | -4.3917925 | -1.4766951 |
| C | 3.2098231  | -5.4918691 | -0.6000085 |
| C | 3.8068374  | 2.8878905  | 1.6286084  |
| O | 4.5370875  | 3.2053915  | 2.8107720  |
| C | 5.8484984  | 3.6389439  | 2.5397028  |
| H | 0.6020683  | -0.0240001 | 2.7622195  |
| H | 0.7563878  | -0.8768209 | 1.2064420  |
| H | -0.8425999 | -0.5415306 | 1.8825999  |
| H | -0.6575657 | 2.6491870  | 2.9558916  |
| H | -0.8882017 | 3.7090009  | 1.5470091  |
| H | -2.0013587 | 2.3693095  | 1.8316894  |
| H | -4.4819579 | -0.3240792 | -2.7913415 |
| H | -3.9011052 | 1.3464365  | -2.9629837 |
| H | -3.0518295 | 0.0282718  | -3.7699605 |
| H | -3.1421226 | -2.3213754 | -1.0915654 |
| H | -1.5795095 | -2.0251908 | -0.2956700 |
| H | -1.6573607 | -2.1743478 | -2.0440934 |
| H | 3.4741242  | 0.4644887  | -3.0061814 |

|   |            |            |            |
|---|------------|------------|------------|
| H | 3.0278010  | 1.4362841  | -1.5828796 |
| H | 2.5988633  | 1.9914101  | -3.2021509 |
| H | 1.3751215  | -0.8422682 | -4.7142718 |
| H | -0.3305676 | -0.9321048 | -4.2498698 |
| H | 0.3502689  | 0.5947749  | -4.8153888 |
| H | -4.8257242 | -0.9505091 | -0.0511723 |
| H | -5.4348572 | 0.7039411  | -0.2064560 |
| H | 1.9792471  | -2.6419265 | -3.0284118 |
| H | 3.2738635  | -1.8436416 | -2.1215942 |
| H | 2.5027175  | 1.5451169  | 2.6735558  |
| H | 1.9252541  | 3.2175469  | 2.5997243  |
| H | -4.7698045 | 1.1550889  | 2.1588001  |
| H | -4.1768415 | -0.5133759 | 2.2985316  |
| H | -7.5454389 | -0.6963497 | 3.5730003  |
| H | -6.4299346 | 0.6511473  | 3.9086934  |
| H | -5.8457619 | -1.0283674 | 3.9941136  |
| H | 2.5454400  | -3.0059289 | -0.0491767 |
| H | 1.2325786  | -3.7922974 | -0.9507568 |
| H | 3.9158797  | -6.2108622 | -1.0184631 |
| H | 3.5546699  | -5.1988222 | 0.4025627  |
| H | 2.2292179  | -5.9787340 | -0.4946234 |
| H | 3.7304993  | 3.7690562  | 0.9769479  |
| H | 4.3160203  | 2.0939619  | 1.0653543  |
| H | 6.3266940  | 3.8607713  | 3.4953580  |
| H | 6.4351107  | 2.8658465  | 2.0224063  |
| H | 5.8578183  | 4.5475234  | 1.9195287  |



[(MeOCH<sub>2</sub>CH<sub>2</sub>OSiMe<sub>2</sub>)<sub>3</sub>SiH] (2-H-A)

|    |            |            |            |
|----|------------|------------|------------|
| C  | 2.0068629  | 2.5408007  | 2.9242255  |
| Si | 2.0021877  | 1.7690655  | 1.1881720  |
| O  | 3.6077939  | 1.5931002  | 0.6635035  |
| C  | 4.3868554  | 2.6386239  | 0.0998598  |
| C  | 5.8489690  | 2.2521142  | 0.0587888  |
| O  | 6.0598847  | 1.2328971  | -0.9034849 |
| C  | 7.4137877  | 0.8405620  | -0.9936501 |
| C  | 1.0477258  | 2.9148796  | 0.0218237  |
| Si | 1.1526111  | -0.4432635 | 1.1909110  |
| Si | 0.4383245  | -1.1267286 | -0.9926972 |
| C  | 0.7967764  | -2.9606234 | -1.2945264 |
| Si | 2.5631585  | -2.0116158 | 2.3064548  |
| C  | 1.5548384  | -3.4932854 | 2.9048162  |
| C  | 3.4669573  | -1.2141301 | 3.7727666  |
| O  | 3.6891268  | -2.6974835 | 1.2541305  |
| C  | 4.7673765  | -2.0343706 | 0.6152157  |
| C  | 5.3800097  | -2.9428756 | -0.4280090 |
| O  | 4.5013545  | -3.0856759 | -1.5323453 |
| C  | 4.9642653  | -4.0221642 | -2.4839975 |
| C  | -1.4039687 | -0.7697769 | -1.2111257 |
| O  | 1.1732152  | -0.1886654 | -2.1855899 |
| C  | 2.5705900  | -0.0970423 | -2.4323839 |
| C  | 2.8307040  | 0.8607777  | -3.5720376 |
| O  | 2.5742249  | 2.1949289  | -3.1575811 |
| C  | 2.6828628  | 3.1268986  | -4.2127646 |
| H  | 5.9321051  | -3.7225023 | -2.9102438 |
| H  | 4.2257729  | -4.0657935 | -3.2840961 |

|   |            |            |            |
|---|------------|------------|------------|
| H | 5.0716940  | -5.0230673 | -2.0453030 |
| H | 1.9648917  | 2.9120077  | -5.0156950 |
| H | 3.6940680  | 3.1367671  | -4.6434625 |
| H | 2.4650262  | 4.1123189  | -3.8009759 |
| H | 8.0602084  | 1.6796037  | -1.2872052 |
| H | 7.4772931  | 0.0650283  | -1.7565306 |
| H | 7.7836697  | 0.4361032  | -0.0413193 |
| H | 2.9840578  | -1.0761299 | -2.7001498 |
| H | 3.1047460  | 0.2548997  | -1.5431182 |
| H | 3.8800741  | 0.7616000  | -3.8877758 |
| H | 2.1863038  | 0.5994717  | -4.4232562 |
| H | 2.5758259  | 1.9358288  | 3.6326154  |
| H | 0.9858926  | 2.6349274  | 3.3041053  |
| H | 2.4463862  | 3.5426621  | 2.9040517  |
| H | 1.4248100  | 3.9403654  | 0.0812411  |
| H | -0.0089755 | 2.9371585  | 0.3022511  |
| H | 1.1242886  | 2.5788025  | -1.0137390 |
| H | 1.0765596  | -4.0049360 | 2.0675530  |
| H | 0.7758817  | -3.1832871 | 3.6054779  |
| H | 2.2065504  | -4.2112690 | 3.4099857  |
| H | 0.4687023  | -3.2464214 | -2.2984330 |
| H | 0.2538732  | -3.5804271 | -0.5753476 |
| H | 1.8609454  | -3.1840144 | -1.1956005 |
| H | 5.5498845  | -1.7896516 | 1.3460032  |
| H | 4.4507357  | -1.0956560 | 0.1484810  |
| H | 4.3084342  | 3.5575888  | 0.6976676  |
| H | 4.0421182  | 2.8597107  | -0.9160165 |
| H | 6.3366975  | -2.5112816 | -0.7603285 |
| H | 5.5850894  | -3.9241587 | 0.0228394  |

|   |            |            |            |
|---|------------|------------|------------|
| H | -1.6182596 | 0.2911369  | -1.0700779 |
| H | -2.0009119 | -1.3368023 | -0.4927374 |
| H | -1.7212338 | -1.0491269 | -2.2193379 |
| H | 6.4399718  | 3.1445432  | -0.2024186 |
| H | 6.1701439  | 1.9115371  | 1.0535612  |
| H | 4.0924623  | -1.9526697 | 4.2827808  |
| H | 2.7508782  | -0.8203457 | 4.4989480  |
| H | 4.1054575  | -0.3875172 | 3.4532656  |
| H | -0.0943122 | -0.3894834 | 2.0329831  |

[(MeOCH<sub>2</sub>CH<sub>2</sub>OSiMe<sub>2</sub>)<sub>3</sub>SiH] (2-H-B)

|    |            |            |            |
|----|------------|------------|------------|
| Si | -0.4691057 | 1.3470298  | -0.1088820 |
| Si | -2.3353928 | 0.5601406  | -1.3414318 |
| Si | -0.0358952 | -0.0566258 | 1.7484379  |
| Si | 1.4579823  | 1.6357675  | -1.4535843 |
| C  | 0.0212445  | -1.8822809 | 1.2445229  |
| C  | -1.3337307 | 0.1818351  | 3.1073490  |
| C  | -3.1826491 | 1.9613804  | -2.2992939 |
| C  | -1.8881970 | -0.8317697 | -2.5476018 |
| C  | 2.8653002  | 2.4549980  | -0.4883380 |
| C  | 1.1199712  | 2.6550633  | -3.0203005 |
| O  | -3.3922818 | -0.0374227 | -0.1578739 |
| C  | -4.6839488 | -0.5648352 | -0.4312624 |
| O  | 1.8814911  | 0.0558122  | -1.8905571 |
| C  | 3.0261669  | -0.2872342 | -2.6589089 |
| O  | 1.4868768  | 0.4263718  | 2.3148261  |
| C  | 2.1053464  | -0.1084940 | 3.4768584  |
| C  | -5.3573485 | -0.8850206 | 0.8919479  |

O -6.6400296 -1.4143967 0.6097698  
C -7.3730274 -1.7398313 1.7737955  
C 3.0610184 -1.7984835 -2.8114173  
O 4.2046978 -2.1314517 -3.5775278  
C 4.3450738 -3.5222794 -3.7880851  
C 3.4826830 0.5174043 3.6151241  
O 4.0885018 -0.0173939 4.7783229  
C 5.3856326 0.4935980 5.0115549  
H 0.2894672 -2.5215341 2.0904618  
H 0.7490856 -2.0452638 0.4470528  
H -0.9593253 -2.2037301 0.8845126  
H -1.1690898 -0.4992731 3.9471097  
H -1.3223782 1.2051180 3.4890290  
H -2.3280792 -0.0157309 2.6999054  
H -4.0464665 1.5981562 -2.8633669  
H -3.5222117 2.7485796 -1.6228328  
H -2.4891784 2.4114755 -3.0145709  
H -2.7711553 -1.1824280 -3.0893321  
H -1.4469177 -1.6827997 -2.0250483  
H -1.1592445 -0.4841092 -3.2835468  
H 3.7758518 2.5295450 -1.0897049  
H 3.0862563 1.8908827 0.4193148  
H 2.5792576 3.4678893 -0.1924951  
H 2.0310758 2.7857656 -3.6115560  
H 0.3712127 2.1797101 -3.6579987  
H 0.7540143 3.6512017 -2.7572954  
H -4.6181368 -1.4795299 -1.0317674  
H -5.3006480 0.1559387 -0.9802555  
H 2.9899766 0.1726923 -3.6533521

|   |            |            |            |
|---|------------|------------|------------|
| H | 3.9480670  | 0.0443152  | -2.1675051 |
| H | 2.2137829  | -1.1971967 | 3.4064231  |
| H | 1.5183715  | 0.1141729  | 4.3751996  |
| H | -5.4340804 | 0.0291870  | 1.4971666  |
| H | -4.7491349 | -1.6099745 | 1.4510216  |
| H | -8.3368012 | -2.1318627 | 1.4506368  |
| H | -7.5409768 | -0.8565157 | 2.4047701  |
| H | -6.8599203 | -2.5039885 | 2.3731625  |
| H | 3.1035567  | -2.2684972 | -1.8190390 |
| H | 2.1426268  | -2.1413879 | -3.3081813 |
| H | 5.2462749  | -3.6704517 | -4.3821942 |
| H | 4.4497437  | -4.0652666 | -2.8391596 |
| H | 3.4862843  | -3.9363016 | -4.3334407 |
| H | 3.3859673  | 1.6095555  | 3.6896100  |
| H | 4.0830334  | 0.2914645  | 2.7225953  |
| H | 5.7610797  | 0.0226794  | 5.9194815  |
| H | 6.0661394  | 0.2606798  | 4.1812993  |
| H | 5.3706859  | 1.5825600  | 5.1548297  |
| H | -0.8404886 | 2.7038217  | 0.4170616  |

$[(\text{MeOCH}_2\text{CH}_2\text{OSiMe}_2)_3\text{Ge}]^- (\mathbf{3}^-\text{-A})$

|    |           |           |            |
|----|-----------|-----------|------------|
| C  | 1.4428250 | 1.6836405 | 3.8287809  |
| Si | 0.3014431 | 1.4786265 | 2.3120572  |
| O  | 1.3021590 | 2.1577074 | 1.0947906  |
| C  | 0.9803141 | 2.1330018 | -0.2825560 |
| C  | 1.5152615 | 3.3596170 | -0.9874598 |
| O  | 2.9359336 | 3.3108182 | -1.0969728 |
| C  | 3.4695975 | 4.4720797 | -1.6771613 |

C -1.1267826 2.7362131 2.5607670  
Ge -0.5093274 -0.8134648 2.1962064  
Si -2.3966514 -0.7224141 0.6736628  
C -2.9244772 -2.5028622 0.1748216  
Si 1.2265033 -1.8510448 0.8789164  
C 1.1012023 -3.7693111 0.9706977  
C 2.9791557 -1.4478237 1.5465218  
O 1.2769484 -1.4900256 -0.8141256  
C 2.2356850 -1.9975887 -1.7091288  
C 1.6528507 -2.9848551 -2.7064346  
O 0.8633107 -2.3070028 -3.6744192  
C 0.1960623 -3.1876819 -4.5458877  
C -3.9139349 0.0381551 1.5499967  
O -2.4328613 0.1815516 -0.7912742  
C -1.6575923 -0.1325949 -1.9263538  
C -2.0025886 0.7936555 -3.0725956  
O -1.5087650 2.1077458 -2.8391845  
C -1.9207352 3.0233683 -3.8218272  
H 0.9013119 -3.8156465 -5.1127702  
H -0.3758441 -2.5815998 -5.2494362  
H -0.4955211 -3.8503890 -4.0064543  
H -3.0165424 3.1169766 -3.8590921  
H -1.5675735 2.7377025 -4.8254596  
H -1.4959518 3.9951293 -3.5656518  
H 3.0887650 4.6367091 -2.6982779  
H 4.5531631 4.3501249 -1.7248094  
H 3.2424488 5.3702744 -1.0822154  
H -1.8654736 -1.1553325 -2.2763439  
H -0.5854339 -0.0916858 -1.7132396

|   |            |            |            |
|---|------------|------------|------------|
| H | -1.5603090 | 0.3956761  | -3.9999380 |
| H | -3.0956409 | 0.8256775  | -3.1945280 |
| H | 2.3019781  | 1.0120051  | 3.7652174  |
| H | 0.9003705  | 1.4482775  | 4.7486408  |
| H | 1.8167080  | 2.7104585  | 3.8922074  |
| H | -0.7245859 | 3.7256457  | 2.8037026  |
| H | -1.7870624 | 2.4224860  | 3.3742910  |
| H | -1.7354543 | 2.8277151  | 1.6577786  |
| H | 0.1449964  | -4.1227164 | 0.5755223  |
| H | 1.1613161  | -4.0880167 | 2.0149442  |
| H | 1.9061391  | -4.2695359 | 0.4199177  |
| H | -3.8446199 | -2.4855270 | -0.4195708 |
| H | -3.1050534 | -3.1025375 | 1.0710648  |
| H | -2.1509997 | -3.0101656 | -0.4072412 |
| H | 3.0571106  | -2.5123406 | -1.1898978 |
| H | 2.6821372  | -1.1660339 | -2.2692637 |
| H | -0.1023943 | 2.1144161  | -0.4520184 |
| H | 1.3927931  | 1.2340184  | -0.7537770 |
| H | 2.4769625  | -3.5163580 | -3.2130226 |
| H | 1.0445252  | -3.7280285 | -2.1736244 |
| H | -3.7327757 | 1.0834933  | 1.8090347  |
| H | -4.1338803 | -0.5028486 | 2.4741291  |
| H | -4.7936835 | -0.0039728 | 0.8998688  |
| H | 1.0703820  | 3.4085318  | -1.9931590 |
| H | 1.2176154  | 4.2604888  | -0.4305260 |
| H | 3.7641899  | -2.0282595 | 1.0495456  |
| H | 3.0282012  | -1.6727552 | 2.6157220  |
| H | 3.2023375  | -0.3863803 | 1.4163518  |

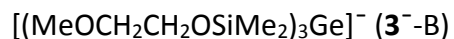

|    |            |            |            |
|----|------------|------------|------------|
| Ge | -0.4716294 | 0.2694362  | -1.5708237 |
| Si | -2.1773915 | -1.0883987 | -0.4918719 |
| Si | 0.1926162  | 1.5788787  | 0.3640046  |
| Si | 1.3498469  | -1.3332728 | -1.5282207 |
| C  | 0.4879420  | 0.7991562  | 2.0904909  |
| C  | -1.0580574 | 2.9985490  | 0.6729193  |
| C  | -3.0789851 | -2.1784381 | -1.7914806 |
| C  | -1.8237271 | -2.2863390 | 0.9641413  |
| C  | 2.9810362  | -0.5132815 | -2.1118547 |
| C  | 1.0706146  | -2.7925522 | -2.7493415 |
| O  | -3.3629631 | 0.0179207  | 0.1042759  |
| C  | -4.5981696 | -0.3612076 | 0.6594469  |
| O  | 1.7132003  | -2.0765948 | -0.0095088 |
| C  | 2.7291484  | -3.0307514 | 0.1867140  |
| O  | 1.6861592  | 2.3340692  | -0.0640176 |
| C  | 2.3519133  | 3.2836527  | 0.7300702  |
| C  | -5.3675836 | 0.9075173  | 0.9894529  |
| O  | -6.6279930 | 0.5554619  | 1.5534090  |
| C  | -7.4054272 | 1.6804762  | 1.8870561  |
| C  | 2.7585052  | -3.3823465 | 1.6654757  |
| O  | 3.7736662  | -4.3571551 | 1.8914264  |
| C  | 3.8729562  | -4.7328906 | 3.2445993  |
| C  | 3.4678456  | 3.8888764  | -0.1072278 |
| O  | 4.1782578  | 4.8413072  | 0.6800166  |
| C  | 5.2325167  | 5.4512381  | -0.0253189 |
| H  | 0.8949622  | 1.5229580  | 2.8063623  |
| H  | 1.1706100  | -0.0493818 | 2.0151262  |



|   |            |            |            |
|---|------------|------------|------------|
| H | -0.4588965 | 0.4303126  | 2.4944594  |
| H | -0.7944602 | 3.6241592  | 1.5325944  |
| H | -1.1401047 | 3.6372410  | -0.2105388 |
| H | -2.0434698 | 2.5615446  | 0.8560074  |
| H | -3.9132433 | -2.7450380 | -1.3635832 |
| H | -3.4601803 | -1.5629180 | -2.6103845 |
| H | -2.3771887 | -2.8985198 | -2.2230111 |
| H | -2.7157957 | -2.8504511 | 1.2599385  |
| H | -1.4512586 | -1.7440526 | 1.8358104  |
| H | -1.0463756 | -2.9968072 | 0.6739324  |
| H | 3.8235824  | -1.2132438 | -2.1312684 |
| H | 3.2331927  | 0.3265691  | -1.4607199 |
| H | 2.8498892  | -0.1176222 | -3.1231214 |
| H | 1.9573086  | -3.4281352 | -2.8476021 |
| H | 0.2351773  | -3.4239543 | -2.4347971 |
| H | 0.8303120  | -2.3985375 | -3.7407526 |
| H | -4.4718955 | -0.9503104 | 1.5786835  |
| H | -5.1946997 | -0.9656688 | -0.0378972 |
| H | 2.5479857  | -3.9472472 | -0.3922067 |
| H | 3.7163245  | -2.6483162 | -0.1067728 |
| H | 2.7890425  | 2.8292251  | 1.6300821  |
| H | 1.6824242  | 4.0894377  | 1.0622768  |
| H | -5.5084738 | 1.4987762  | 0.0742806  |
| H | -4.7876392 | 1.5152125  | 1.6970766  |
| H | -8.3469383 | 1.3189163  | 2.3034443  |
| H | -7.6230812 | 2.3014906  | 1.0056041  |
| H | -6.9069487 | 2.3136310  | 2.6357206  |
| H | 2.9589415  | -2.4769583 | 2.2542932  |
| H | 1.7781152  | -3.7719509 | 1.9703635  |

|   |           |            |            |
|---|-----------|------------|------------|
| H | 4.6668474 | -5.4774022 | 3.3225539  |
| H | 4.1256404 | -3.8773935 | 3.8880392  |
| H | 2.9360580 | -5.1738857 | 3.6152005  |
| H | 3.0391211 | 4.3697194  | -0.9968966 |
| H | 4.1437109 | 3.0925689  | -0.4470084 |
| H | 5.7184343 | 6.1554046  | 0.6519924  |
| H | 5.9764288 | 4.7153085  | -0.3639625 |
| H | 4.8698710 | 6.0008376  | -0.9065895 |

[(MeOCH<sub>2</sub>CH<sub>2</sub>OSiMe<sub>2</sub>)<sub>3</sub>GeH] (**3**-H-A)

|    |            |            |            |
|----|------------|------------|------------|
| C  | 2.8153223  | 2.8062408  | 1.5650198  |
| Si | 2.2691412  | 1.9067028  | -0.0026074 |
| O  | 3.6411064  | 1.9258659  | -0.9799700 |
| C  | 3.7525245  | 1.3407611  | -2.2712782 |
| C  | 5.1398262  | 1.5676720  | -2.8255433 |
| O  | 6.0854929  | 0.7760493  | -2.1207911 |
| C  | 7.4147269  | 1.0201060  | -2.5303499 |
| C  | 0.8524577  | 2.8342759  | -0.8469467 |
| Ge | 1.6319419  | -0.3875326 | 0.5154923  |
| Si | -0.3982803 | -1.1546738 | -0.5747009 |
| C  | -0.5085593 | -3.0486886 | -0.5611473 |
| Si | 3.4877084  | -1.9098788 | 0.2755129  |
| C  | 3.2207722  | -3.5278901 | 1.2323592  |
| C  | 5.1311106  | -1.1434761 | 0.8182739  |
| O  | 3.5167261  | -2.2558484 | -1.3860500 |
| C  | 4.6612165  | -2.7068409 | -2.0959070 |
| C  | 4.2794893  | -3.1589306 | -3.4879773 |
| O  | 3.9155700  | -2.0435234 | -4.2836347 |

C 3.5594555 -2.4079324 -5.6008909  
C -1.9184957 -0.4073842 0.2594300  
O -0.4953248 -0.5952673 -2.1629135  
C 0.3560136 -0.9584567 -3.2370908  
C 0.0965232 -0.0566243 -4.4236088  
O 0.5973110 1.2458685 -4.1687409  
C 0.2618401 2.1713157 -5.1826238  
H 4.3904235 -2.9029282 -6.1226894  
H 3.3052267 -1.4925298 -6.1345222  
H 2.6917746 -3.0819304 -5.6153567  
H -0.8260608 2.2769594 -5.2876442  
H 0.6786215 1.8756340 -6.1556965  
H 0.6834193 3.1344987 -4.8964801  
H 7.5610980 0.7865632 -3.5944693  
H 8.0628426 0.3766552 -1.9355916  
H 7.7029637 2.0664430 -2.3614582  
H 0.1532620 -1.9914880 -3.5504375  
H 1.4131719 -0.9037673 -2.9562126  
H 0.5886178 -0.4822614 -5.3118071  
H -0.9845291 -0.0165800 -4.6168716  
H 3.6534073 2.2922836 2.0390694  
H 1.9983306 2.8665040 2.2880799  
H 3.1350539 3.8231462 1.3214370  
H 1.1650965 3.8547154 -1.0889374  
H -0.0136065 2.8970430 -0.1820978  
H 0.5361379 2.3372858 -1.7664087  
H 2.3032142 -4.0311454 0.9212989  
H 3.1510720 -3.3315856 2.3056193  
H 4.0558964 -4.2170689 1.0739733

H -1.4274999 -3.3829114 -1.0519516  
H -0.5176196 -3.4261044 0.4648003  
H 0.3406014 -3.5041316 -1.0753518  
H 5.1279994 -3.5632928 -1.5893310  
H 5.4029979 -1.9040455 -2.1689619  
H 3.0270177 1.7830343 -2.9635393  
H 3.5574482 0.2639866 -2.2323437  
H 5.1421794 -3.6759155 -3.9375136  
H 3.4469639 -3.8750391 -3.4290095  
H -1.8954686 0.6826591 0.2071869  
H -1.9694969 -0.6972645 1.3115605  
H -2.8297948 -0.7507871 -0.2376985  
H 5.1435767 1.2949623 -3.8914595  
H 5.3998272 2.6322063 -2.7391992  
H 5.9498846 -1.8648587 0.7349752  
H 5.0706391 -0.8344299 1.8654106  
H 5.3800384 -0.2689503 0.2138935  
H 1.2838393 -0.3987594 2.0355944

[(MeOCH<sub>2</sub>CH<sub>2</sub>OSiMe<sub>2</sub>)<sub>3</sub>GeH] (**3**-H-B)

Ge -0.6877535 0.9937979 -0.9909959  
Si -2.7226528 -0.2934269 -1.1319452  
Si 0.0251379 1.2092012 1.3015209  
Si 1.1105422 0.1785517 -2.3685274  
C -0.0286681 -0.4598201 2.1950733  
C -1.0369479 2.4642197 2.2408896  
C -3.7489978 0.1721362 -2.6570460  
C -2.4039313 -2.1616977 -1.1451777

C 2.5231672 1.4368134 -2.4348461  
C 0.5741606 -0.2429492 -4.1400035  
O -3.5648023 0.1284648 0.2769323  
C -4.8682181 -0.3366520 0.6037476  
O 1.6070665 -1.2327131 -1.5790215  
C 2.7465511 -1.9996761 -1.9414645  
O 1.6256779 1.7564298 1.2108904  
C 2.4493914 1.9820087 2.3465943  
C -5.2936918 0.3146037 1.9090696  
O -6.5889129 -0.1610776 2.2277756  
C -7.0997553 0.3798549 3.4299042  
C 2.8964927 -3.1279694 -0.9360079  
O 4.0387292 -3.8838966 -1.2962601  
C 4.2848475 -4.9655469 -0.4204465  
C 3.8122313 2.4462252 1.8630022  
O 4.6272163 2.6609046 3.0011893  
C 5.9308246 3.0979744 2.6733166  
H 0.3356507 -0.3748078 3.2226443  
H 0.5808609 -1.2008443 1.6737656  
H -1.0563893 -0.8288848 2.2352975  
H -0.7408866 2.5373606 3.2913527  
H -0.9634707 3.4577377 1.7935359  
H -2.0838752 2.1539385 2.2047062  
H -4.6760875 -0.4057649 -2.7094949  
H -4.0068291 1.2333213 -2.6502221  
H -3.1829503 -0.0284846 -3.5705565  
H -3.3418080 -2.7242646 -1.1654733  
H -1.8370962 -2.4730392 -0.2655199  
H -1.8266452 -2.4453475 -2.0287646

|   |            |            |            |
|---|------------|------------|------------|
| H | 3.3764076  | 1.0610307  | -3.0066451 |
| H | 2.8564969  | 1.6880070  | -1.4264562 |
| H | 2.1814857  | 2.3578299  | -2.9145428 |
| H | 1.4212514  | -0.5953753 | -4.7358217 |
| H | -0.1927516 | -1.0207331 | -4.1537045 |
| H | 0.1667234  | 0.6410530  | -4.6375653 |
| H | -4.8812785 | -1.4258904 | 0.7263424  |
| H | -5.5913728 | -0.0762322 | -0.1775883 |
| H | 2.6365415  | -2.4254211 | -2.9458909 |
| H | 3.6565892  | -1.3890830 | -1.9313025 |
| H | 2.5735529  | 1.0658877  | 2.9356549  |
| H | 2.0216225  | 2.7492798  | 3.0026549  |
| H | -5.2939850 | 1.4075042  | 1.7934560  |
| H | -4.5760582 | 0.0589558  | 2.7014612  |
| H | -8.0925050 | -0.0437820 | 3.5788303  |
| H | -7.1834958 | 1.4736084  | 3.3768391  |
| H | -6.4682586 | 0.1198920  | 4.2900863  |
| H | 3.0063481  | -2.7078177 | 0.0734693  |
| H | 1.9931858  | -3.7537935 | -0.9447634 |
| H | 5.1761240  | -5.4780894 | -0.7811653 |
| H | 4.4630512  | -4.6201244 | 0.6068503  |
| H | 3.4455560  | -5.6741043 | -0.4088585 |
| H | 3.7027845  | 3.3705600  | 1.2787420  |
| H | 4.2506248  | 1.6814577  | 1.2061401  |
| H | 6.4708564  | 3.2372317  | 3.6093360  |
| H | 6.4629007  | 2.3569733  | 2.0614604  |
| H | 5.9112364  | 4.0509076  | 2.1274975  |
| H | -1.0344112 | 2.4150872  | -1.5159568 |

$[(\text{SiMe}_3)_3\text{C}]^-$  (**7**<sup>-</sup>)

|    |            |            |            |
|----|------------|------------|------------|
| C  | 2.2562551  | 2.7725955  | 1.4373531  |
| Si | 1.9693161  | 1.7580082  | -0.1818432 |
| C  | 3.3997730  | 2.3264087  | -1.3439781 |
| C  | 0.4491840  | 2.6442820  | -0.9662173 |
| C  | 1.7914155  | -0.0455709 | 0.0457084  |
| Si | 0.1564246  | -0.8293924 | -0.1744601 |
| C  | 0.1215141  | -2.7435154 | 0.0432032  |
| Si | 3.1756377  | -1.0170325 | 0.7358430  |
| C  | 2.9082873  | -1.6865568 | 2.5287145  |
| C  | 4.8499993  | -0.0766078 | 0.8878525  |
| C  | 3.6939836  | -2.5779427 | -0.2715998 |
| C  | -1.2122378 | -0.2405174 | 1.0558232  |
| C  | -0.6534423 | -0.6191800 | -1.9121505 |
| H  | 3.1404073  | 2.4255225  | 1.9791792  |
| H  | 1.3989623  | 2.6542511  | 2.1071394  |
| H  | 2.3855809  | 3.8425976  | 1.2345214  |
| H  | 0.6237235  | 3.7255067  | -0.9517595 |
| H  | -0.4831789 | 2.4535058  | -0.4292600 |
| H  | 0.3027759  | 2.3466452  | -2.0075506 |
| H  | 2.0063737  | -2.3000089 | 2.6025011  |
| H  | 2.7888188  | -0.8501162 | 3.2243290  |
| H  | 3.7556283  | -2.2940834 | 2.8689047  |
| H  | -0.9178837 | -3.0858849 | -0.0069774 |
| H  | 0.5325023  | -3.0756294 | 0.9994359  |
| H  | 0.6745183  | -3.2491256 | -0.7524370 |
| H  | -1.3508806 | 0.8433606  | 1.0157660  |
| H  | -0.9224005 | -0.4918639 | 2.0808930  |

|   |            |            |            |
|---|------------|------------|------------|
| H | -2.1814814 | -0.7109865 | 0.8508641  |
| H | 5.5706474  | -0.7196217 | 1.4045751  |
| H | 4.7710276  | 0.8533618  | 1.4559509  |
| H | 5.2660231  | 0.1649431  | -0.0934192 |
| H | 3.3771251  | 3.4132017  | -1.4870061 |
| H | 3.2977951  | 1.8520773  | -2.3246357 |
| H | 4.3829474  | 2.0626445  | -0.9496956 |
| H | 2.8995127  | -3.3255402 | -0.3194871 |
| H | 4.5756318  | -3.0546688 | 0.1728535  |
| H | 3.9423875  | -2.2939096 | -1.2986475 |
| H | -0.8785514 | 0.4238966  | -2.1429131 |
| H | -1.5894716 | -1.1862195 | -1.9771408 |
| H | 0.0239002  | -0.9904730 | -2.6871372 |

[(SiMe<sub>3</sub>)<sub>3</sub>CH] (7-H)

|    |            |            |            |
|----|------------|------------|------------|
| C  | 0.4229467  | 3.3225047  | 2.3772272  |
| Si | -0.3716271 | 2.1274520  | 1.1284152  |
| C  | 0.6522427  | 2.1092534  | -0.4732961 |
| C  | -2.0444299 | 2.9319881  | 0.7008160  |
| C  | -0.5321154 | 0.3734616  | 1.8981868  |
| Si | -1.9938237 | -0.6722233 | 1.2179991  |
| C  | -1.9627848 | -2.4921404 | 1.7784564  |
| Si | 1.1263236  | -0.5800449 | 2.0817234  |
| C  | 1.0256312  | -1.7894026 | 3.5467314  |
| C  | 2.6119474  | 0.5400824  | 2.4886992  |
| C  | 1.5787589  | -1.5354367 | 0.5007507  |
| C  | -3.6440666 | 0.0008005  | 1.8828052  |
| C  | -2.0316326 | -0.6894522 | -0.6829555 |



|   |            |            |            |
|---|------------|------------|------------|
| H | 1.4536150  | 3.0677673  | 2.6229226  |
| H | -0.1484238 | 3.3428491  | 3.3096104  |
| H | 0.4185406  | 4.3374656  | 1.9692048  |
| H | -1.8534301 | 3.9323080  | 0.3005417  |
| H | -2.6739148 | 3.0509988  | 1.5857628  |
| H | -2.6163571 | 2.3843260  | -0.0497138 |
| H | 0.2934545  | -2.5831241 | 3.4002769  |
| H | 0.7660755  | -1.2598175 | 4.4679461  |
| H | 2.0000966  | -2.2605303 | 3.7045113  |
| H | -2.8473944 | -2.9916635 | 1.3721581  |
| H | -2.0081682 | -2.5839611 | 2.8661720  |
| H | -1.0879793 | -3.0430638 | 1.4296116  |
| H | -3.8670262 | 1.0114419  | 1.5426605  |
| H | -3.6447263 | 0.0072650  | 2.9765559  |
| H | -4.4634012 | -0.6482620 | 1.5601683  |
| H | 3.4962927  | -0.0923801 | 2.6112861  |
| H | 2.4665982  | 1.0811140  | 3.4267289  |
| H | 2.8372020  | 1.2688803  | 1.7089010  |
| H | -0.8259388 | 0.5768538  | 2.9400060  |
| H | 0.1997651  | 1.4652183  | -1.2307103 |
| H | 1.6767448  | 1.7680299  | -0.3142246 |
| H | 0.7035258  | 3.1196914  | -0.8883272 |
| H | 0.8470695  | -2.3058624 | 0.2504832  |
| H | 2.5443788  | -2.0309885 | 0.6350884  |
| H | 1.6683976  | -0.8691445 | -0.3603251 |
| H | -2.1732939 | 0.3045684  | -1.1112979 |
| H | -2.8591884 | -1.3157540 | -1.0279060 |
| H | -1.1101625 | -1.1032721 | -1.0985961 |

$[(\text{SiMe}_3)_3\text{Si}]^-$  (**8**<sup>-</sup>)

|    |            |            |            |
|----|------------|------------|------------|
| C  | 2.1538672  | 2.3852095  | 3.0547372  |
| Si | 1.8588808  | 1.5903468  | 1.3252717  |
| C  | 3.5850108  | 1.6797568  | 0.4672308  |
| C  | 0.7957999  | 2.8900549  | 0.3810017  |
| Si | 0.6977692  | -0.4711762 | 1.5754598  |
| Si | 0.1980861  | -1.0360650 | -0.6805408 |
| C  | -0.2762724 | -2.8955167 | -0.8514670 |
| Si | 2.4674379  | -1.9774828 | 2.0852169  |
| C  | 1.7439921  | -3.6926993 | 2.5801107  |
| C  | 3.4482290  | -1.4109814 | 3.6436593  |
| C  | 3.8381763  | -2.4011647 | 0.7949537  |
| C  | -1.3774538 | -0.0915295 | -1.2596774 |
| C  | 1.4690231  | -0.7401654 | -2.1021182 |
| H  | 2.7916255  | 1.7525630  | 3.6778550  |
| H  | 1.2041166  | 2.5108249  | 3.5816514  |
| H  | 2.6322929  | 3.3678136  | 2.9678142  |
| H  | 1.2542280  | 3.8841279  | 0.4358446  |
| H  | -0.2090528 | 2.9542811  | 0.8070060  |
| H  | 0.6901086  | 2.6284955  | -0.6753464 |
| H  | 1.1966417  | -4.1473610 | 1.7499212  |
| H  | 1.0427089  | -3.5824541 | 3.4115589  |
| H  | 2.5347698  | -4.3877816 | 2.8854778  |
| H  | -0.6748475 | -3.1067631 | -1.8504241 |
| H  | -1.0360379 | -3.1725283 | -0.1157390 |
| H  | 0.5886310  | -3.5453930 | -0.6927956 |
| H  | -1.2156995 | 0.9897811  | -1.2589819 |
| H  | -2.2133436 | -0.2967141 | -0.5856082 |

|   |            |            |            |
|---|------------|------------|------------|
| H | -1.6705770 | -0.3896487 | -2.2730753 |
| H | 4.1373287  | -2.1958244 | 3.9759948  |
| H | 2.7692929  | -1.1815113 | 4.4693009  |
| H | 4.0374695  | -0.5124646 | 3.4413857  |
| H | 3.5357408  | 1.3010773  | -0.5567066 |
| H | 4.3225695  | 1.0766518  | 1.0039530  |
| H | 3.9564448  | 2.7113237  | 0.4328214  |
| H | 3.4084076  | -2.8657353 | -0.0965607 |
| H | 4.5741719  | -3.0978649 | 1.2150189  |
| H | 4.3668186  | -1.5008349 | 0.4725884  |
| H | 1.7179858  | 0.3207693  | -2.1911326 |
| H | 1.0674328  | -1.0732974 | -3.0670827 |
| H | 2.4007680  | -1.2802826 | -1.9172399 |

[(SiMe<sub>3</sub>)<sub>3</sub>SiH] (**8-H**)

|    |            |            |            |
|----|------------|------------|------------|
| C  | 1.8794022  | 2.4418123  | 3.0364090  |
| Si | 1.8884548  | 1.7722272  | 1.2539407  |
| C  | 3.6615246  | 1.8822229  | 0.5655535  |
| C  | 0.7665661  | 2.8929170  | 0.1980925  |
| Si | 1.1084808  | -0.4799907 | 1.2340187  |
| Si | 0.3678273  | -1.1896790 | -0.9175527 |
| C  | 0.0119035  | -3.0612604 | -0.9350679 |
| Si | 2.6387708  | -2.0049906 | 2.2402126  |
| C  | 1.7331435  | -3.6130538 | 2.7088266  |
| C  | 3.3897038  | -1.2704850 | 3.8297805  |
| C  | 4.0601985  | -2.4255044 | 1.0433997  |
| C  | -1.2416806 | -0.2813431 | -1.3759695 |
| C  | 1.6824240  | -0.8186645 | -2.2456129 |

|   |            |            |            |
|---|------------|------------|------------|
| H | 2.5295244  | 1.8585737  | 3.6917794  |
| H | 0.8727980  | 2.4203243  | 3.4608572  |
| H | 2.2282608  | 3.4788254  | 3.0535372  |
| H | 1.1013527  | 3.9324074  | 0.2661773  |
| H | -0.2709203 | 2.8535809  | 0.5378054  |
| H | 0.7852967  | 2.6066704  | -0.8558095 |
| H | 1.3038724  | -4.1073470 | 1.8349240  |
| H | 0.9211320  | -3.4153957 | 3.4124081  |
| H | 2.4259261  | -4.3140475 | 3.1844828  |
| H | -0.3858960 | -3.3599740 | -1.9096880 |
| H | -0.7243833 | -3.3353539 | -0.1759608 |
| H | 0.9157420  | -3.6468801 | -0.7525940 |
| H | -1.1000926 | 0.8006545  | -1.4164518 |
| H | -2.0304230 | -0.4874477 | -0.6487039 |
| H | -1.5959471 | -0.6103308 | -2.3575843 |
| H | 4.0441714  | -2.0039476 | 4.3105326  |
| H | 2.6140365  | -0.9944232 | 4.5477229  |
| H | 3.9867903  | -0.3797070 | 3.6217423  |
| H | -0.1157357 | -0.4938683 | 2.1098075  |
| H | 3.7189881  | 1.5120567  | -0.4608838 |
| H | 4.3642373  | 1.3024645  | 1.1687946  |
| H | 4.0050197  | 2.9210250  | 0.5635613  |
| H | 3.6906672  | -2.9024939 | 0.1326661  |
| H | 4.7642342  | -3.1159002 | 1.5174117  |
| H | 4.6172097  | -1.5328026 | 0.7496379  |
| H | 1.8853124  | 0.2521245  | -2.3222863 |
| H | 1.3388611  | -1.1624915 | -3.2257773 |
| H | 2.6277268  | -1.3220432 | -2.0294493 |

$[(\text{SiMe}_3)_3\text{Ge}]^-$  (**9**<sup>-</sup>)

|    |            |            |            |
|----|------------|------------|------------|
| C  | 1.5448675  | 1.7763516  | 3.6830504  |
| Si | 0.2171742  | 1.5014432  | 2.3141402  |
| C  | 0.9977950  | 2.2931348  | 0.7377871  |
| C  | -1.2073779 | 2.7077222  | 2.7936762  |
| Ge | -0.5325371 | -0.8267124 | 2.3713038  |
| Si | -2.3577915 | -0.7402620 | 0.7442203  |
| C  | -2.8149872 | -2.5033082 | 0.1149348  |
| Si | 1.2155647  | -1.8825864 | 1.0236306  |
| C  | 0.9795402  | -3.7944685 | 1.0581427  |
| C  | 2.9551466  | -1.6087143 | 1.8061550  |
| C  | 1.4659249  | -1.4741162 | -0.8450370 |
| C  | -3.9597135 | -0.1213632 | 1.6181544  |
| C  | -2.2586263 | 0.3255401  | -0.8603580 |
| H  | 2.4381735  | 1.1746227  | 3.4946451  |
| H  | 1.1530946  | 1.4799418  | 4.6599980  |
| H  | 1.8502396  | 2.8278384  | 3.7398024  |
| H  | -0.8260753 | 3.7224920  | 2.9575012  |
| H  | -1.7021898 | 2.3780339  | 3.7113930  |
| H  | -1.9687329 | 2.7594642  | 2.0102303  |
| H  | 0.0414268  | -4.0862870 | 0.5779186  |
| H  | 0.9438182  | -4.1562945 | 2.0894060  |
| H  | 1.7986222  | -4.3090610 | 0.5419755  |
| H  | -3.7468374 | -2.4867673 | -0.4623274 |
| H  | -2.9463809 | -3.1934958 | 0.9527920  |
| H  | -2.0304232 | -2.9122849 | -0.5276912 |
| H  | -3.8466512 | 0.9082495  | 1.9686764  |
| H  | -4.1814025 | -0.7405810 | 2.4917993  |

|   |            |            |            |
|---|------------|------------|------------|
| H | -4.8240627 | -0.1571664 | 0.9442914  |
| H | 3.7103508  | -2.2360076 | 1.3181790  |
| H | 2.9449141  | -1.8553782 | 2.8713760  |
| H | 3.2746497  | -0.5670042 | 1.7136770  |
| H | 1.2594289  | 3.3443283  | 0.9119263  |
| H | 0.3068887  | 2.2501241  | -0.1077705 |
| H | 1.9089379  | 1.7657632  | 0.4428439  |
| H | 1.6706442  | -0.4107828 | -0.9918446 |
| H | 0.5706357  | -1.7175616 | -1.4238697 |
| H | 2.3034463  | -2.0443871 | -1.2657693 |
| H | -2.1319091 | 1.3845421  | -0.6197045 |
| H | -3.1722409 | 0.2233728  | -1.4588274 |
| H | -1.4098202 | 0.0278006  | -1.4809352 |

[(SiMe<sub>3</sub>)<sub>3</sub>GeH] (9-H)

|    |            |            |            |
|----|------------|------------|------------|
| C  | 3.2869253  | 2.6019331  | 1.4584457  |
| Si | 2.1627996  | 1.9254114  | 0.0801125  |
| C  | 3.0728415  | 2.0710510  | -1.5862193 |
| C  | 0.5930129  | 3.0007292  | 0.0086838  |
| Ge | 1.5952469  | -0.3875100 | 0.5454796  |
| Si | -0.3546848 | -1.1634198 | -0.6737201 |
| C  | -0.5935241 | -3.0377472 | -0.4371014 |
| Si | 3.4861150  | -1.9004428 | 0.3883045  |
| C  | 3.1056280  | -3.5010297 | 1.3445872  |
| C  | 5.0482349  | -1.1137513 | 1.1407086  |
| C  | 3.8459350  | -2.3359314 | -1.4301706 |
| C  | -1.9117903 | -0.2779638 | -0.0315433 |
| C  | -0.1642400 | -0.8085657 | -2.5349288 |

|   |            |            |            |
|---|------------|------------|------------|
| H | 4.2214865  | 2.0414466  | 1.5277445  |
| H | 2.7925936  | 2.5481748  | 2.4312901  |
| H | 3.5374711  | 3.6499000  | 1.2665914  |
| H | 0.8602739  | 4.0502955  | -0.1482539 |
| H | 0.0239427  | 2.9363592  | 0.9388690  |
| H | -0.0656397 | 2.6999686  | -0.8092114 |
| H | 2.2320473  | -4.0158327 | 0.9389838  |
| H | 2.9095753  | -3.2929089 | 2.3990877  |
| H | 3.9555368  | -4.1883163 | 1.2902955  |
| H | -1.5011938 | -3.3720195 | -0.9491846 |
| H | -0.6920405 | -3.2961856 | 0.6197230  |
| H | 0.2457247  | -3.6058957 | -0.8446811 |
| H | -1.8457104 | 0.8035799  | -0.1669752 |
| H | -2.0636642 | -0.4718493 | 1.0328125  |
| H | -2.7986165 | -0.6301928 | -0.5673473 |
| H | 5.8793640  | -1.8251581 | 1.1138718  |
| H | 4.8875384  | -0.8268122 | 2.1823855  |
| H | 5.3569155  | -0.2216965 | 0.5910911  |
| H | 1.1766242  | -0.4114060 | 2.0479961  |
| H | 2.4652722  | 1.6917165  | -2.4112338 |
| H | 4.0121897  | 1.5132681  | -1.5801603 |
| H | 3.3086725  | 3.1178603  | -1.8002744 |
| H | 4.0699035  | -1.4437663 | -2.0198099 |
| H | 2.9969913  | -2.8398820 | -1.8981121 |
| H | 4.7086125  | -3.0054686 | -1.4985698 |
| H | -0.0739950 | 0.2621698  | -2.7324381 |
| H | -1.0374499 | -1.1751663 | -3.0829849 |
| H | 0.7193385  | -1.2994518 | -2.9494806 |

## 6. References

- 1) A. G. Brook, F. Abdesaken and H. Söllradl, *J. Organomet. Chem.* **1986**, *299*, 9-13.
- 2) U. Herzog, N. Schulze, K. Trommer and G. Roewer, *J. Organomet. Chem.* **1997**, *547*, 133.
- 3) H. Li, L. J. Hope-Weeks and C. Krempner, *Chem. Comm.* **2011**, *47*, 4117-4119.
- 4) H. Li, A. J. A. Aquino, D. B. Cordes, F. Hung-Low, W. L. Hase and C. Krempner, *J. Am. Chem. Soc.* **2013**, *135*, 16066-16069.
- 5) M. Schlosser and J. Hartmann, *Angew. Chem.* **1973**, *85*, 544-5.
- 6) G. C. Vougioukalakis, M. M. Roubelakis and M. Orfanopoulos, *J. Org. Chem.* **2010**, *75*, 4124-4130.
- 7) H. Nakamura, Y. Nakayama, H. Yasuda, T. Maruo, N. Kanehisa and Y. Kai, *Organometallics* **2000**, *19*, 5392-5399.
- 8) L. A. Carpino and A. C. Wu, PCT Int. Appl. **1991**, WO 9108190 A1 19910613.
- 9) G. M. Sheldrick, *SADABS v2008/1*, 2008.
- 10) G. M. Sheldrick, *Acta Crystallogr.*, **2008**, *A64*, 112-122.
- 11) A. D. Becke, *J. Chem. Phys.* **1993**, *98*, 5648.
- 12) A. Schäfer, H. Horne and R. Ahlrichs, *J. Chem. Phys.* **1992**, *97*, 2571-2577.
- 13) A. Schäfer, C. Huber and R. Ahlrichs, *J. Chem. Phys.* **1994**, *100*, 5829-5835.
- 14) A. E. Reed, R. B. Weinstock and F. Weinhold, *J. Chem. Phys.* **1985**, *83*, 735-46.
- 15) R. Ahlrichs, M. Bär, M.; Häser, H. Horn and C. Kölmel, *Chem. Phys. Lett.* **1989**, *162*, 165.
- 16) NBO, version 3.1 E. D. Glendening, A. E. Reed, J. E. Carpenter and F. Weinhold  
Theoretical Chemistry Institute WISC-TCI, University of Wisconsin-Madison
- 17) F. Weigend and R. Ahlrichs, *Phys. Chem. Chem. Phys.*, **2005**, *7*, 3297-305.
- 18) F. Weigend, *Phys. Chem. Chem. Phys.* **2006**, *8*, 1057-65.
- 19) Gaussian 09, Revision **E.01**, M. J. Frisch, G. W. Trucks, H. B. Schlegel, G. E. Scuseria, M. A. Robb, J. R. Cheeseman, G. Scalmani, V. Barone, B. Mennucci, G. A. Petersson, H. Nakatsuji, M. Caricato, X. Li, H. P. Hratchian, A. F. Izmaylov, J. Bloino, G. Zheng, J. L. Sonnenberg, M. Hada, M. Ehara, K. Toyota, R. Fukuda, J. Hasegawa, M. Ishida, T. Nakajima, Y. Honda, O.



Kitao, H. Nakai, T. Vreven, J. A. Montgomery, Jr., J. E. Peralta, F. Ogliaro, M. Bearpark, J. J. Heyd, E. Brothers, K. N. Kudin, V. N. Staroverov, R. Kobayashi, J. Normand, K. Raghavachari, A. Rendell, J. C. Burant, S. S. Iyengar, J. Tomasi, M. Cossi, N. Rega, J. M. Millam, M. Klene, J. E. Knox, J. B. Cross, V. Bakken, C. Adamo, J. Jaramillo, R. Gomperts, R. E. Stratmann, O. Yazyev, A. J. Austin, R. Cammi, C. Pomelli, J. W. Ochterski, R. L. Martin, K. Morokuma, V. G. Zakrzewski, G. A. Voth, P. Salvador, J. J. Dannenberg, S. Dapprich, A. D. Daniels, Ö. Farkas, J. B. Foresman, J. V. Ortiz, J. Cioslowski, and D. J. Fox, Gaussian, Inc., Wallingford CT, **2009**.
